# Supplementary material for: Synthetic Exploration of Bis(phenolate) Aza-BODIPYs and Heavier Group 13 Chelates
Source: MDPI journal article supplement (doi:10.3390/molecules27238256), 2022-11-26

## Supplementary Information

### Synthetic Exploration of Bis(phenolate) aza-BODIPYs and Heavier Group 13 Chelates

Aiden M. Lane,<sup>†</sup> Ny T. C. Luong,<sup>†</sup> Jordan C. Kelly,<sup>‡</sup> Martin J. Neal,<sup>‡</sup> Jeremiah Jamrom,<sup>‡</sup> Aaron J. Bloomfield,<sup>‡</sup> Paul A. Lummis,<sup>‡</sup> Thomas D. Montgomery,<sup>\*‡</sup> and Daniel T. Chase<sup>\*†</sup>,

<sup>†</sup>Department of Chemistry and Biochemistry, St. Mary's College of Maryland, St. Mary's City, Maryland 20686

<sup>‡</sup>Department of Chemistry and Biochemistry, Duquesne University, Pittsburgh, Pennsylvania 15282

*Email: dtchase@smcm.edu; montgomerytl@duq.edu*

#### Table of Contents

|                                                                                                                          |     |
|--------------------------------------------------------------------------------------------------------------------------|-----|
| Cartesian Coordinates of Stationary Points for <b>1a-b</b> , <b>2a-b</b> , <b>3a-b</b> , and <b>4a-b</b>                 | S2  |
| HOMO/LUMO Energies and Orbital Maps for <b>1a-b</b> , <b>2a-b</b> , <b>3a-b</b> , and <b>4a-b</b>                        | S20 |
| Single crystal X-ray diffraction structures for <b>1a</b> , <b>2a-b</b> , <b>3a-b</b> , <b>4a-b</b> , and <b>4a'</b>     | S26 |
| Crystallographic data and refinement parameters for <b>1a</b> , <b>2a-b</b> , <b>3a-b</b> , <b>4a-b</b> , and <b>4a'</b> | S37 |
| Crystallographic bond and dihedral angles for <b>1a</b> , <b>2a-b</b> , <b>3a-b</b> , <b>4a-b</b> , and <b>4a'</b>       | S41 |
| References                                                                                                               | S43 |
| NMR Spectra                                                                                                              | S44 |

## Cartesian Coordinates

1a

|                                     |              |                |
|-------------------------------------|--------------|----------------|
| Imaginary Freq                      | 0            |                |
| Temperature                         | 298.150      | Kelvin         |
| Pressure                            | 1.00000      | atm            |
| Frequencies scaled by               | 1.0000       |                |
| Electronic Energy (EE)              | -1649.987899 | Hartree        |
| Zero-point Energy Correction        | 0.495678     | Hartree        |
| Thermal Correction to Energy        | 0.526563     | Hartree        |
| Thermal Correction to Enthalpy      | 0.527508     | Hartree        |
| Thermal Correction to Free Energy   | 0.431019     | Hartree        |
| EE + Zero-point Energy              | -1649.492221 | Hartree        |
| EE + Thermal Energy Correction      | -1649.461335 | Hartree        |
| EE + Thermal Enthalpy Correction    | -1649.460391 | Hartree        |
| EE + Thermal Free Energy Correction | -1649.556880 | Hartree        |
| E (Thermal)                         | 330.424      | kcal/mol       |
| Heat Capacity (Cv)                  | 124.980      | cal/mol-kelvin |
| Entropy (S)                         | 203.077      | cal/mol-kelvin |

```

B   -1.999020  -0.000000  -0.000007
C    6.345344   4.211769  -0.888230
O   -2.884194  -0.386858  -1.127632
N    1.005383   0.000007  -0.000017
N   -1.066528   1.171658  -0.232528
N   -1.066520  -1.171653   0.232506
O   -2.884185   0.386852   1.127627
C    4.913605   3.752410  -0.760561
C    3.181050  -2.062756   1.083446
H    2.893187  -1.081285   1.456653
C    6.345344  -4.211786   0.888276
C   -2.794884  -2.703337  -0.371722
C   -1.454915  -2.463405   0.115456
C    0.324567  -1.111237   0.268790
C    4.504009  -2.489904   1.215143
H    5.232178  -1.827863   1.688475
C   -3.418284  -3.968123  -0.345718
H   -2.926753  -4.789010   0.178473
C    0.811928  -2.471456   0.370739
C   -0.313432  -3.296866   0.266840
H   -0.323951  -4.381535   0.252010
C    0.324559   1.111247  -0.268819
C    2.210191  -2.892499   0.489965
C    4.913615  -3.752402   0.760567
C    3.943295   4.580905  -0.167782
H    4.231109   5.568200   0.200048
C    2.210178   2.892511  -0.489981

```

|   |           |           |           |
|---|-----------|-----------|-----------|
| C | -3.437918 | -1.620095 | -1.051629 |
| C | 2.621401  | 4.163468  | -0.034726 |
| H | 1.900213  | 4.825288  | 0.446451  |
| C | 3.943298  | -4.580915 | 0.167824  |
| H | 4.231105  | -5.568227 | -0.199967 |
| C | 0.811916  | 2.471468  | -0.370761 |
| C | -2.794891 | 2.703333  | 0.371724  |
| C | -1.454926 | 2.463408  | -0.115465 |
| C | -0.313446 | 3.296873  | -0.266849 |
| H | -0.323967 | 4.381543  | -0.252010 |
| C | 4.503989  | 2.489932  | -1.215191 |
| H | 5.232151  | 1.827909  | -1.688558 |
| C | -3.418297 | 3.968117  | 0.345730  |
| H | -2.926773 | 4.789007  | -0.178462 |
| C | -4.640516 | -4.173866 | -0.973314 |
| H | -5.117729 | -5.153302 | -0.937640 |
| C | -4.657876 | -1.851821 | -1.706758 |
| H | -5.131101 | -1.024263 | -2.235816 |
| C | 2.621406  | -4.163476 | 0.034758  |
| H | 1.900214  | -4.825312 | -0.446391 |
| C | 3.181030  | 2.062787  | -1.083503 |
| H | 2.893158  | 1.081333  | -1.456749 |
| C | -5.252999 | 3.110779  | 1.661643  |
| H | -6.209327 | 3.268181  | 2.163024  |
| C | -3.437916 | 1.620086  | 1.051632  |
| C | -4.657868 | 1.851805  | 1.706773  |
| H | -5.131086 | 1.024244  | 2.235832  |
| C | -4.640524 | 4.173853  | 0.973338  |
| H | -5.117741 | 5.153288  | 0.937672  |
| C | -5.253001 | -3.110797 | -1.661618 |
| H | -6.209333 | -3.268204 | -2.162990 |
| H | 6.822596  | 4.294686  | 0.100411  |
| H | 6.936630  | 3.509759  | -1.490435 |
| H | 6.403795  | 5.204794  | -1.357220 |
| H | 6.403772  | -5.204710 | 1.357486  |
| H | 6.822563  | -4.294943 | -0.100359 |
| H | 6.936675  | -3.509669 | 1.490311  |

1b

|                                     |              |                |
|-------------------------------------|--------------|----------------|
| Imaginary Freq                      | 0            |                |
| Temperature                         | 298.150      | Kelvin         |
| Pressure                            | 1.00000      | atm            |
| Frequencies scaled by               | 1.0000       |                |
| Electronic Energy (EE)              | -1800.426880 | Hartree        |
| Zero-point Energy Correction        | 0.506095     | Hartree        |
| Thermal Correction to Energy        | 0.538360     | Hartree        |
| Thermal Correction to Enthalpy      | 0.539304     | Hartree        |
| Thermal Correction to Free Energy   | 0.441511     | Hartree        |
| EE + Zero-point Energy              | -1799.920786 | Hartree        |
| EE + Thermal Energy Correction      | -1799.888521 | Hartree        |
| EE + Thermal Enthalpy Correction    | -1799.887576 | Hartree        |
| EE + Thermal Free Energy Correction | -1799.985369 | Hartree        |
| E (Thermal)                         | 337.826      | kcal/mol       |
| Heat Capacity (Cv)                  | 131.279      | cal/mol-kelvin |
| Entropy (S)                         | 205.823      | cal/mol-kelvin |

|   |           |           |           |
|---|-----------|-----------|-----------|
| B | 2.358032  | -0.000000 | -0.000000 |
| O | -5.850579 | 4.077891  | 0.852432  |
| O | 3.244540  | -0.370337 | 1.133354  |
| N | -0.645566 | 0.000000  | 0.000000  |
| N | 1.426264  | 1.174739  | 0.215117  |
| N | 1.426263  | -1.174739 | -0.215118 |
| O | 3.244541  | 0.370337  | -1.133354 |
| C | -4.536387 | 3.759744  | 0.690236  |
| C | -2.835577 | -2.060781 | -1.008421 |
| H | -2.557031 | -1.070371 | -1.363805 |
| O | -5.850580 | -4.077890 | -0.852432 |
| C | 3.156964  | -2.696747 | 0.408352  |
| C | 1.814884  | -2.465328 | -0.079340 |
| C | 0.035159  | -1.115608 | -0.251274 |
| C | -4.153513 | -2.480389 | -1.132230 |
| H | -4.906178 | -1.829367 | -1.578094 |
| C | 3.782459  | -3.960437 | 0.397101  |
| H | 3.290577  | -4.788996 | -0.114633 |
| C | -0.452670 | -2.477844 | -0.332963 |
| C | 0.675630  | -3.300968 | -0.217602 |
| H | 0.688008  | -4.385250 | -0.186184 |
| C | 0.035159  | 1.115609  | 0.251274  |
| C | -1.848484 | -2.900476 | -0.443330 |
| C | -4.536388 | -3.759744 | -0.690236 |
| C | -3.574377 | 4.611911  | 0.124042  |
| H | -3.838637 | 5.604193  | -0.234971 |
| C | -1.848483 | 2.900477  | 0.443330  |
| C | 3.800338  | -1.603676 | 1.071662  |
| C | -2.253143 | 4.176874  | 0.009107  |

|   |           |           |           |
|---|-----------|-----------|-----------|
| H | -1.526005 | 4.846903  | -0.450844 |
| C | -3.574378 | -4.611910 | -0.124042 |
| H | -3.838637 | -5.604192 | 0.234970  |
| C | -0.452669 | 2.477845  | 0.332963  |
| C | 3.156965  | 2.696747  | -0.408352 |
| C | 1.814885  | 2.465327  | 0.079340  |
| C | 0.675631  | 3.300969  | 0.217602  |
| H | 0.688009  | 4.385251  | 0.186183  |
| C | -4.153512 | 2.480390  | 1.132231  |
| H | -4.906177 | 1.829369  | 1.578096  |
| C | 3.782460  | 3.960436  | -0.397101 |
| H | 3.290579  | 4.788996  | 0.114633  |
| C | 5.007196  | -4.156251 | 1.023596  |
| H | 5.485679  | -5.135449 | 0.999332  |
| C | 5.023064  | -1.824715 | 1.725373  |
| H | 5.496746  | -0.989362 | 2.241685  |
| C | -2.253144 | -4.176874 | -0.009108 |
| H | -1.526006 | -4.846903 | 0.450843  |
| C | -2.835575 | 2.060782  | 1.008422  |
| H | -2.557030 | 1.070373  | 1.363806  |
| C | -6.295041 | 5.371824  | 0.427710  |
| H | -5.775173 | 6.168245  | 0.980227  |
| H | -7.365429 | 5.405110  | 0.654833  |
| H | -6.142716 | 5.505738  | -0.653326 |
| C | 5.620260  | 3.083331  | -1.695500 |
| H | 6.578448  | 3.232426  | -2.195906 |
| C | 3.800339  | 1.603675  | -1.071662 |
| C | 5.023065  | 1.824714  | -1.725372 |
| H | 5.496747  | 0.989360  | -2.241685 |
| C | 5.007198  | 4.156249  | -1.023596 |
| H | 5.485681  | 5.135447  | -0.999332 |
| C | 5.620258  | -3.083333 | 1.695501  |
| H | 6.578446  | -3.232428 | 2.195906  |
| C | -6.295042 | -5.371824 | -0.427711 |
| H | -6.142716 | -5.505738 | 0.653325  |
| H | -7.365430 | -5.405110 | -0.654834 |
| H | -5.775174 | -6.168244 | -0.980228 |

2a

|                                     |              |                |
|-------------------------------------|--------------|----------------|
| Imaginary Freq                      | 0            |                |
| Temperature                         | 298.150      | Kelvin         |
| Pressure                            | 1.00000      | atm            |
| Frequencies scaled by               | 1.0000       |                |
| Electronic Energy (EE)              | -2364.314438 | Hartree        |
| Zero-point Energy Correction        | 0.671516     | Hartree        |
| Thermal Correction to Energy        | 0.715441     | Hartree        |
| Thermal Correction to Enthalpy      | 0.716385     | Hartree        |
| Thermal Correction to Free Energy   | 0.587331     | Hartree        |
| EE + Zero-point Energy              | -2363.642922 | Hartree        |
| EE + Thermal Energy Correction      | -2363.598997 | Hartree        |
| EE + Thermal Enthalpy Correction    | -2363.598053 | Hartree        |
| EE + Thermal Free Energy Correction | -2363.727107 | Hartree        |
| E (Thermal)                         | 448.946      | kcal/mol       |
| Heat Capacity (Cv)                  | 171.962      | cal/mol-kelvin |
| Entropy (S)                         | 271.617      | cal/mol-kelvin |

|    |           |           |           |
|----|-----------|-----------|-----------|
| Al | -1.918981 | -0.000003 | -0.000322 |
| C  | 7.257205  | -3.495261 | 0.198355  |
| O  | -3.244461 | 1.288399  | -0.019451 |
| N  | 1.472151  | 0.000001  | 0.000201  |
| N  | -0.511583 | -1.385720 | 0.024185  |
| N  | -0.511578 | 1.385720  | -0.024032 |
| O  | -3.244470 | -1.288408 | 0.018023  |
| C  | 5.781456  | -3.216364 | 0.183152  |
| N  | -1.969754 | 0.033718  | 2.121088  |
| C  | 3.889165  | 1.768712  | -0.692892 |
| H  | 3.509007  | 0.845655  | -1.126710 |
| C  | 7.257213  | 3.495275  | -0.197742 |
| N  | -1.968569 | -0.033722 | -2.121765 |
| C  | -2.008345 | 3.358851  | -0.025370 |
| C  | -0.705089 | 2.725582  | -0.035849 |
| C  | 0.858984  | 1.169953  | -0.046411 |
| C  | 5.255124  | 2.040147  | -0.727181 |
| H  | 5.928794  | 1.319020  | -1.196190 |
| C  | -2.099588 | 4.767897  | -0.022061 |
| H  | -1.182028 | 5.356454  | -0.024954 |
| C  | 1.545983  | 2.438875  | -0.080255 |
| C  | 0.552035  | 3.399246  | -0.066973 |
| H  | 0.697083  | 4.473557  | -0.109365 |
| C  | 0.858977  | -1.169950 | 0.046746  |
| C  | 2.990168  | 2.675335  | -0.109171 |
| C  | 5.781461  | 3.216394  | -0.182556 |
| C  | 4.883419  | -4.122058 | -0.398365 |
| H  | 5.261694  | -5.049530 | -0.834766 |
| C  | 2.990157  | -2.675332 | 0.109777  |

|   |           |           |           |
|---|-----------|-----------|-----------|
| C | -3.214312 | 2.595075  | -0.018331 |
| C | 3.519219  | -3.858805 | -0.435497 |
| H | 2.849141  | -4.576501 | -0.912027 |
| C | 4.883427  | 4.122037  | 0.399042  |
| H | 5.261702  | 5.049488  | 0.835490  |
| C | 1.545972  | -2.438869 | 0.080793  |
| C | -2.008350 | -3.358854 | 0.025587  |
| C | -0.705097 | -2.725581 | 0.036166  |
| C | 0.552023  | -3.399240 | 0.067535  |
| H | 0.697070  | -4.473547 | 0.110026  |
| C | 5.255117  | -2.040084 | 0.727701  |
| H | 5.928791  | -1.318909 | 1.196633  |
| C | -2.099594 | -4.767902 | 0.023056  |
| H | -1.182036 | -5.356458 | 0.026730  |
| C | -0.864160 | -0.072786 | -2.878633 |
| H | 0.087025  | -0.087290 | -2.348713 |
| C | -3.315258 | 5.429497  | -0.014079 |
| H | -3.349404 | 6.519221  | -0.011456 |
| C | -4.445680 | 3.291770  | -0.011222 |
| H | -5.359303 | 2.694937  | -0.006806 |
| C | 3.519228  | 3.858770  | 0.436181  |
| H | 2.849151  | 4.576433  | 0.912760  |
| C | 3.889154  | -1.768662 | 0.693420  |
| H | 3.508998  | -0.845569 | 1.127162  |
| C | -2.146794 | 0.075750  | 4.899589  |
| H | -2.216101 | 0.092067  | 5.988059  |
| C | -4.498932 | -4.675406 | 0.008927  |
| H | -5.468180 | -5.178523 | 0.002654  |
| C | -3.214316 | -2.595083 | 0.017617  |
| C | -4.445680 | -3.291784 | 0.010294  |
| H | -5.359301 | -2.694954 | 0.005114  |
| C | -0.865716 | 0.072682  | 2.878502  |
| H | 0.085730  | 0.087109  | 2.349043  |
| C | -3.161576 | -0.015597 | -2.733165 |
| H | -4.026939 | 0.017026  | -2.073404 |
| C | -3.315259 | -5.429508 | 0.014925  |
| H | -3.349402 | -6.519233 | 0.012948  |
| C | -2.144236 | -0.075763 | -4.900357 |
| H | -2.213006 | -0.092085 | -5.988862 |
| C | -3.296682 | 0.035786  | 4.114700  |
| H | -4.289519 | 0.019870  | 4.562562  |
| C | -3.294509 | -0.035693 | -4.116038 |
| H | -4.287125 | -0.019695 | -4.564389 |
| C | -0.906282 | 0.094470  | 4.267088  |
| H | 0.022367  | 0.125709  | 4.835443  |
| C | -4.498932 | 4.675391  | -0.009086 |

|   |           |           |           |
|---|-----------|-----------|-----------|
| H | -5.468183 | 5.178504  | -0.002971 |
| C | -0.904041 | -0.094583 | -4.267240 |
| H | 0.024888  | -0.125907 | -4.835132 |
| C | -3.163069 | 0.015691  | 2.731891  |
| H | -4.028119 | -0.016846 | 2.071710  |
| H | 7.463078  | 4.544665  | -0.449275 |
| H | 7.703745  | 3.306839  | 0.790562  |
| H | 7.776596  | 2.856320  | -0.923336 |
| H | 7.463068  | -4.544569 | 0.450240  |
| H | 7.776627  | -2.856077 | 0.923720  |
| H | 7.703694  | -3.307168 | -0.790031 |

## 2b

|                                     |              |                |
|-------------------------------------|--------------|----------------|
| Imaginary Freq                      | 0            |                |
| Temperature                         | 298.150      | Kelvin         |
| Pressure                            | 1.00000      | atm            |
| Frequencies scaled by               | 1.0000       |                |
| Electronic Energy (EE)              | -2514.752698 | Hartree        |
| Zero-point Energy Correction        | 0.681941     | Hartree        |
| Thermal Correction to Energy        | 0.727221     | Hartree        |
| Thermal Correction to Enthalpy      | 0.728166     | Hartree        |
| Thermal Correction to Free Energy   | 0.598381     | Hartree        |
| EE + Zero-point Energy              | -2514.070757 | Hartree        |
| EE + Thermal Energy Correction      | -2514.025477 | Hartree        |
| EE + Thermal Enthalpy Correction    | -2514.024533 | Hartree        |
| EE + Thermal Free Energy Correction | -2514.154317 | Hartree        |
| E (Thermal)                         | 456.338      | kcal/mol       |
| Heat Capacity (Cv)                  | 178.257      | cal/mol-kelvin |
| Entropy (S)                         | 273.155      | cal/mol-kelvin |

|    |           |           |           |
|----|-----------|-----------|-----------|
| Al | 2.237488  | -0.000000 | 0.000000  |
| O  | -6.810739 | 3.441466  | 0.392474  |
| O  | 3.564831  | -1.295626 | -0.013127 |
| N  | -1.165775 | 0.000000  | 0.000000  |
| N  | 0.826105  | 1.391940  | 0.018500  |
| N  | 0.826105  | -1.391940 | -0.018500 |
| O  | 3.564831  | 1.295625  | 0.013128  |
| C  | -5.461865 | 3.262600  | 0.274954  |
| N  | 2.297958  | -0.024944 | 2.153466  |
| C  | -3.585172 | -1.803251 | -0.762602 |
| H  | -3.204411 | -0.883382 | -1.200529 |
| O  | -6.810739 | -3.441465 | -0.392474 |
| N  | 2.297958  | 0.024944  | -2.153465 |
| C  | 2.327767  | -3.375492 | -0.004073 |
| C  | 1.020461  | -2.738970 | -0.025397 |
| C  | -0.552916 | -1.175053 | -0.049048 |
| C  | -4.946130 | -2.079586 | -0.831527 |



|   |           |           |           |
|---|-----------|-----------|-----------|
| H | -5.630285 | -1.386082 | -1.322050 |
| C | 2.422962  | -4.789104 | 0.012964  |
| H | 1.508319  | -5.381175 | 0.014249  |
| C | -1.239541 | -2.450862 | -0.088831 |
| C | -0.240200 | -3.412201 | -0.065761 |
| H | -0.384313 | -4.485883 | -0.110535 |
| C | -0.552916 | 1.175053  | 0.049048  |
| C | -2.685497 | -2.697361 | -0.140510 |
| C | -5.461866 | -3.262600 | -0.274954 |
| C | -4.590167 | 4.165485  | -0.352436 |
| H | -4.955692 | 5.086098  | -0.802692 |
| C | -2.685497 | 2.697362  | 0.140510  |
| C | 3.538246  | -2.609652 | -0.000429 |
| C | -3.224446 | 3.874660  | -0.410436 |
| H | -2.565056 | 4.580120  | -0.917784 |
| C | -4.590167 | -4.165485 | 0.352436  |
| H | -4.955692 | -5.086098 | 0.802690  |
| C | -1.239540 | 2.450862  | 0.088831  |
| C | 2.327767  | 3.375491  | 0.004072  |
| C | 1.020462  | 2.738970  | 0.025397  |
| C | -0.240199 | 3.412201  | 0.065761  |
| H | -0.384313 | 4.485883  | 0.110535  |
| C | -4.946129 | 2.079587  | 0.831527  |
| H | -5.630284 | 1.386083  | 1.322051  |
| C | 2.422963  | 4.789104  | -0.012964 |
| H | 1.508320  | 5.381175  | -0.014251 |
| C | 1.194000  | 0.060724  | -2.921616 |
| H | 0.239416  | 0.077192  | -2.400873 |
| C | 3.644034  | -5.449528 | 0.030491  |
| H | 3.679898  | -6.539163 | 0.044075  |
| C | 4.774799  | -3.304931 | 0.015774  |
| H | 5.688062  | -2.707759 | 0.016908  |
| C | -3.224447 | -3.874660 | 0.410435  |
| H | -2.565056 | -4.580120 | 0.917783  |
| C | -3.585172 | 1.803251  | 0.762603  |
| H | -3.204410 | 0.883383  | 1.200530  |
| C | 2.487611  | -0.055489 | 4.944086  |
| H | 2.561532  | -0.067290 | 6.032126  |
| C | -7.384385 | 4.635664  | -0.148570 |
| H | -6.965282 | 5.530393  | 0.335501  |
| H | -8.456636 | 4.571845  | 0.063876  |
| H | -7.227391 | 4.692800  | -1.236056 |
| C | 4.830663  | 4.692559  | -0.031014 |
| H | 5.800249  | 5.194650  | -0.044270 |
| C | 3.538246  | 2.609652  | 0.000429  |
| C | 4.774800  | 3.304930  | -0.015773 |

|   |           |           |           |
|---|-----------|-----------|-----------|
| H | 5.688062  | 2.707759  | -0.016908 |
| C | 1.194000  | -0.060723 | 2.921616  |
| H | 0.239416  | -0.077192 | 2.400873  |
| C | 3.497722  | 0.004615  | -2.764627 |
| H | 4.362774  | -0.024765 | -2.106199 |
| C | 3.644035  | 5.449527  | -0.030492 |
| H | 3.679899  | 6.539163  | -0.044076 |
| C | 2.487612  | 0.055489  | -4.944085 |
| H | 2.561533  | 0.067290  | -6.032126 |
| C | 3.636714  | -0.018968 | 4.150934  |
| H | 4.631401  | -0.001444 | 4.594709  |
| C | 3.636715  | 0.018967  | -4.150933 |
| H | 4.631401  | 0.001443  | -4.594708 |
| C | 1.241564  | -0.076654 | 4.314105  |
| H | 0.315406  | -0.105436 | 4.886703  |
| C | 4.830663  | -4.692559 | 0.031014  |
| H | 5.800248  | -5.194651 | 0.044270  |
| C | -7.384385 | -4.635664 | 0.148569  |
| H | -7.227391 | -4.692801 | 1.236056  |
| C | 1.241565  | 0.076654  | -4.314104 |
| H | 0.315407  | 0.105437  | -4.886703 |
| C | 3.497721  | -0.004616 | 2.764628  |
| H | 4.362774  | 0.024765  | 2.106200  |
| H | -8.456636 | -4.571845 | -0.063876 |
| H | -6.965282 | -5.530393 | -0.335502 |

### 3a

|                                     |              |                |
|-------------------------------------|--------------|----------------|
| Imaginary Freq                      | 0            |                |
| Temperature                         | 298.150      | Kelvin         |
| Pressure                            | 1.00000      | atm            |
| Frequencies scaled by               | 1.0000       |                |
| Electronic Energy (EE)              | -4046.646586 | Hartree        |
| Zero-point Energy Correction        | 0.669446     | Hartree        |
| Thermal Correction to Energy        | 0.714323     | Hartree        |
| Thermal Correction to Enthalpy      | 0.715267     | Hartree        |
| Thermal Correction to Free Energy   | 0.582304     | Hartree        |
| EE + Zero-point Energy              | -4045.977139 | Hartree        |
| EE + Thermal Energy Correction      | -4045.932263 | Hartree        |
| EE + Thermal Enthalpy Correction    | -4045.931318 | Hartree        |
| EE + Thermal Free Energy Correction | -4046.064282 | Hartree        |
| E (Thermal)                         | 448.244      | kcal/mol       |
| Heat Capacity (Cv)                  | 173.375      | cal/mol-kelvin |
| Entropy (S)                         | 279.845      | cal/mol-kelvin |

|    |           |           |           |
|----|-----------|-----------|-----------|
| Ga | -1.832979 | 0.000000  | 0.000000  |
| C  | 7.386492  | 3.533959  | -0.344098 |
| O  | -3.229624 | -1.346860 | -0.033122 |

|   |           |           |           |
|---|-----------|-----------|-----------|
| N | 1.576754  | -0.000000 | -0.000000 |
| N | -0.402449 | 1.414593  | 0.017391  |
| N | -0.402450 | -1.414593 | -0.017391 |
| O | -3.229623 | 1.346861  | 0.033122  |
| C | 5.905371  | 3.247686  | -0.279923 |
| N | -1.926884 | 0.042989  | -2.220100 |
| C | 3.984798  | -1.831027 | 0.804553  |
| H | 3.586183  | -0.941617 | 1.287980  |
| C | 7.386491  | -3.533960 | 0.344098  |
| N | -1.926884 | -0.042989 | 2.220100  |
| C | -1.904728 | -3.397440 | -0.077397 |
| C | -0.598278 | -2.757615 | -0.034413 |
| C | 0.972461  | -1.180151 | 0.028467  |
| C | 5.352031  | -2.108466 | 0.883376  |
| H | 6.002089  | -1.424286 | 1.433395  |
| C | -1.970860 | -4.814013 | -0.125332 |
| H | -1.042411 | -5.383522 | -0.133542 |
| C | 1.662322  | -2.454585 | 0.052338  |
| C | 0.670531  | -3.421905 | 0.004472  |
| H | 0.826161  | -4.494469 | 0.032162  |
| C | 0.972461  | 1.180151  | -0.028467 |
| C | 3.110362  | -2.694262 | 0.117283  |
| C | 5.905371  | -3.247687 | 0.279922  |
| C | 5.032740  | 4.109769  | 0.406977  |
| H | 5.430388  | 5.004830  | 0.890883  |
| C | 3.110363  | 2.694262  | -0.117283 |
| C | -3.137252 | -2.660181 | -0.072819 |
| C | 3.667160  | 3.841164  | 0.487080  |
| H | 3.020870  | 4.523364  | 1.041438  |
| C | 5.032739  | -4.109770 | -0.406977 |
| H | 5.430387  | -5.004830 | -0.890883 |
| C | 1.662322  | 2.454585  | -0.052338 |
| C | -1.904728 | 3.397440  | 0.077397  |
| C | -0.598277 | 2.757615  | 0.034413  |
| C | 0.670532  | 3.421905  | -0.004472 |
| H | 0.826162  | 4.494469  | -0.032162 |
| C | 5.352032  | 2.108465  | -0.883376 |
| H | 6.002089  | 1.424285  | -1.433395 |
| C | -1.970859 | 4.814014  | 0.125332  |
| H | -1.042410 | 5.383523  | 0.133542  |
| C | -0.827587 | 0.031973  | 2.989562  |
| H | 0.125733  | 0.111066  | 2.470654  |
| C | -3.172087 | -5.506092 | -0.165362 |
| H | -3.178634 | -6.595653 | -0.202679 |
| C | -4.354325 | -3.392715 | -0.112226 |
| H | -5.281926 | -2.818138 | -0.106593 |

|   |           |           |           |
|---|-----------|-----------|-----------|
| C | 3.667159  | -3.841164 | -0.487080 |
| H | 3.020870  | -4.523365 | -1.041438 |
| C | 3.984798  | 1.831026  | -0.804553 |
| H | 3.586184  | 0.941616  | -1.287980 |
| C | -2.127652 | 0.088319  | -5.004006 |
| H | -2.206207 | 0.105928  | -6.091645 |
| C | -4.377599 | 4.779078  | 0.157514  |
| H | -5.334924 | 5.303449  | 0.187969  |
| C | -3.137251 | 2.660181  | 0.072819  |
| C | -4.354325 | 3.392715  | 0.112226  |
| H | -5.281925 | 2.818139  | 0.106594  |
| C | -0.827587 | -0.031971 | -2.989562 |
| H | 0.125733  | -0.111063 | -2.470654 |
| C | -3.126778 | -0.140710 | 2.819496  |
| H | -3.986057 | -0.202211 | 2.155201  |
| C | -3.172086 | 5.506092  | 0.165362  |
| H | -3.178633 | 6.595654  | 0.202679  |
| C | -2.127651 | -0.088319 | 5.004006  |
| H | -2.206206 | -0.105928 | 6.091645  |
| C | -3.271256 | 0.166086  | -4.205612 |
| H | -4.264791 | 0.245863  | -4.645203 |
| C | -3.271255 | -0.166087 | 4.205613  |
| H | -4.264790 | -0.245865 | 4.645204  |
| C | -0.881067 | -0.012218 | -4.382147 |
| H | 0.039509  | -0.075367 | -4.961057 |
| C | -4.377600 | -4.779078 | -0.157514 |
| H | -5.334925 | -5.303448 | -0.187969 |
| C | -0.881067 | 0.012220  | 4.382147  |
| H | 0.039509  | 0.075370  | 4.961057  |
| C | -3.126779 | 0.140709  | -2.819495 |
| H | -3.986057 | 0.202208  | -2.155200 |
| H | 7.578959  | -4.594986 | 0.557890  |
| H | 7.875814  | -3.303951 | -0.615442 |
| H | 7.875291  | -2.929749 | 1.119861  |
| H | 7.578959  | 4.594985  | -0.557889 |
| H | 7.875291  | 2.929748  | -1.119862 |
| H | 7.875814  | 3.303949  | 0.615441  |

3b

|                                     |              |                |
|-------------------------------------|--------------|----------------|
| Imaginary Freq                      | 0            |                |
| Temperature                         | 298.150      | Kelvin         |
| Pressure                            | 1.00000      | atm            |
| Frequencies scaled by               | 1.0000       |                |
| Electronic Energy (EE)              | -4197.084828 | Hartree        |
| Zero-point Energy Correction        | 0.679741     | Hartree        |
| Thermal Correction to Energy        | 0.726045     | Hartree        |
| Thermal Correction to Enthalpy      | 0.726989     | Hartree        |
| Thermal Correction to Free Energy   | 0.592356     | Hartree        |
| EE + Zero-point Energy              | -4196.405087 | Hartree        |
| EE + Thermal Energy Correction      | -4196.358783 | Hartree        |
| EE + Thermal Enthalpy Correction    | -4196.357839 | Hartree        |
| EE + Thermal Free Energy Correction | -4196.492472 | Hartree        |
| E (Thermal)                         | 455.600      | kcal/mol       |
| Heat Capacity (Cv)                  | 179.724      | cal/mol-kelvin |
| Entropy (S)                         | 283.359      | cal/mol-kelvin |

|    |           |           |           |
|----|-----------|-----------|-----------|
| Ga | 2.140625  | -0.000001 | 0.000001  |
| O  | -6.931023 | -3.415960 | -0.400335 |
| O  | 3.538409  | 1.346295  | 0.029011  |
| N  | -1.267770 | 0.000000  | -0.000002 |
| N  | 0.711317  | -1.414325 | -0.025632 |
| N  | 0.711318  | 1.414325  | 0.025630  |
| O  | 3.538408  | -1.346297 | -0.029007 |
| C  | -5.581231 | -3.244178 | -0.283250 |
| N  | 2.235618  | 0.043677  | -2.221085 |
| C  | -3.696917 | 1.795329  | 0.772585  |
| H  | -3.311441 | 0.877917  | 1.211665  |
| O  | -6.931020 | 3.415966  | 0.400333  |
| N  | 2.235612  | -0.043678 | 2.221086  |
| C  | 2.214497  | 3.397861  | 0.017996  |
| C  | 0.907069  | 2.757801  | 0.037597  |
| C  | -0.664208 | 1.179731  | 0.054333  |
| C  | -5.059330 | 2.064494  | 0.841118  |
| H  | -5.739862 | 1.367819  | 1.332168  |
| C  | 2.281649  | 4.814967  | 0.001007  |
| H  | 1.353454  | 5.384977  | -0.001776 |
| C  | -1.354880 | 2.453925  | 0.098649  |
| C  | -0.360682 | 3.421372  | 0.080310  |
| H  | -0.514910 | 4.493324  | 0.129896  |
| C  | -0.664209 | -1.179731 | -0.054336 |
| C  | -2.802134 | 2.693679  | 0.149711  |
| C  | -5.581229 | 3.244183  | 0.283247  |
| C  | -4.714333 | -4.150984 | 0.345133  |
| H  | -5.084766 | -5.069049 | 0.796570  |
| C  | -2.802135 | -2.693678 | -0.149715 |

|   |           |           |           |
|---|-----------|-----------|-----------|
| C | 3.446658  | 2.660229  | 0.015613  |
| C | -3.347058 | -3.867432 | 0.402734  |
| H | -2.691381 | -4.575630 | 0.911081  |
| C | -4.714329 | 4.150989  | -0.345135 |
| H | -5.084761 | 5.069054  | -0.796571 |
| C | -1.354882 | -2.453924 | -0.098652 |
| C | 2.214495  | -3.397863 | -0.017996 |
| C | 0.907067  | -2.757802 | -0.037598 |
| C | -0.360685 | -3.421372 | -0.080312 |
| H | -0.514913 | -4.493324 | -0.129898 |
| C | -5.059331 | -2.064490 | -0.841122 |
| H | -5.739862 | -1.367815 | -1.332172 |
| C | 2.281646  | -4.814969 | -0.001007 |
| H | 1.353450  | -5.384978 | 0.001774  |
| C | 1.133129  | -0.079374 | 2.988768  |
| H | 0.177322  | -0.087295 | 2.468445  |
| C | 3.483444  | 5.507368  | -0.015146 |
| H | 3.490524  | 6.597508  | -0.028926 |
| C | 4.664285  | 3.392825  | 0.001003  |
| H | 5.591529  | 2.817609  | 0.001099  |
| C | -3.347055 | 3.867435  | -0.402737 |
| H | -2.691378 | 4.575633  | -0.911083 |
| C | -3.696918 | -1.795326 | -0.772589 |
| H | -3.311441 | -0.877915 | -1.211670 |
| C | 2.436142  | 0.094601  | -5.004891 |
| H | 2.514603  | 0.114379  | -6.092506 |
| C | -7.511041 | -4.606243 | 0.142601  |
| H | -7.096816 | -5.503948 | -0.340145 |
| H | -8.582953 | -4.536952 | -0.069825 |
| H | -7.354215 | -4.662542 | 1.230155  |
| C | 4.688587  | -4.779898 | 0.014068  |
| H | 5.646331  | -5.304298 | 0.026111  |
| C | 3.446656  | -2.660232 | -0.015610 |
| C | 4.664283  | -3.392829 | -0.000999 |
| H | 5.591527  | -2.817613 | -0.001093 |
| C | 1.133136  | 0.079352  | -2.988769 |
| H | 0.177328  | 0.087257  | -2.468449 |
| C | 3.438522  | -0.033297 | 2.822132  |
| H | 4.300558  | -0.003072 | 2.159279  |
| C | 3.483441  | -5.507370 | 0.015147  |
| H | 3.490520  | -6.597511 | 0.028926  |
| C | 2.436129  | -0.094603 | 5.004894  |
| H | 2.514587  | -0.114382 | 6.092509  |
| C | 3.583047  | 0.058160  | -4.208270 |
| H | 4.579131  | 0.048667  | -4.649233 |
| C | 3.583036  | -0.058140 | 4.208275  |

|   |           |           |           |
|---|-----------|-----------|-----------|
| H | 4.579118  | -0.048630 | 4.649242  |
| C | 1.186393  | 0.105228  | -4.381306 |
| H | 0.263212  | 0.133330  | -4.958844 |
| C | 4.688590  | 4.779895  | -0.014065 |
| H | 5.646334  | 5.304294  | -0.026106 |
| C | -7.511037 | 4.606250  | -0.142601 |
| H | -7.354212 | 4.662550  | -1.230156 |
| C | 1.186383  | -0.105251 | 4.381305  |
| H | 0.263201  | -0.133371 | 4.958840  |
| C | 3.438529  | 0.033317  | -2.822126 |
| H | 4.300564  | 0.003109  | -2.159271 |
| H | -8.582949 | 4.536961  | 0.069825  |
| H | -7.096811 | 5.503954  | 0.340145  |

#### 4a

|                                     |              |                |
|-------------------------------------|--------------|----------------|
| Imaginary Freq                      | 0            |                |
| Temperature                         | 298.150      | Kelvin         |
| Pressure                            | 1.00000      | atm            |
| Frequencies scaled by               | 1.0000       |                |
| Electronic Energy (EE)              | -2123.677773 | Hartree        |
| Zero-point Energy Correction        | 0.668011     | Hartree        |
| Thermal Correction to Energy        | 0.713478     | Hartree        |
| Thermal Correction to Enthalpy      | 0.714423     | Hartree        |
| Thermal Correction to Free Energy   | 0.580827     | Hartree        |
| EE + Zero-point Energy              | -2123.009762 | Hartree        |
| EE + Thermal Energy Correction      | -2122.964295 | Hartree        |
| EE + Thermal Enthalpy Correction    | -2122.963350 | Hartree        |
| EE + Thermal Free Energy Correction | -2123.096946 | Hartree        |
| E (Thermal)                         | 447.714      | kcal/mol       |
| Heat Capacity (Cv)                  | 174.185      | cal/mol-kelvin |
| Entropy (S)                         | 281.175      | cal/mol-kelvin |

|    |           |           |           |
|----|-----------|-----------|-----------|
| In | 1.870064  | -0.000000 | 0.000001  |
| C  | -7.528220 | 3.381782  | 0.514950  |
| O  | 3.206026  | -1.520672 | -0.002893 |
| N  | -1.650367 | 0.000000  | -0.000000 |
| N  | 0.303449  | 1.461927  | -0.002767 |
| N  | 0.303449  | -1.461927 | 0.002768  |
| O  | 3.206026  | 1.520672  | 0.002895  |
| C  | -6.042668 | 3.129788  | 0.416172  |
| N  | 1.967006  | -0.002528 | 2.354899  |
| C  | -4.068044 | -1.789066 | -0.938496 |
| H  | -3.630408 | -0.930920 | -1.444936 |
| C  | -7.528220 | -3.381782 | -0.514953 |
| N  | 1.967008  | 0.002528  | -2.354898 |
| C  | 1.756745  | -3.495333 | 0.055207  |
| C  | 0.466185  | -2.809255 | 0.003901  |

|   |           |           |           |
|---|-----------|-----------|-----------|
| C | -1.065086 | -1.190431 | -0.050744 |
| C | -5.440667 | -2.030152 | -1.045145 |
| H | -6.055817 | -1.348396 | -1.636692 |
| C | 1.752906  | -4.913962 | 0.114843  |
| H | 0.796737  | -5.434651 | 0.128701  |
| C | -1.786145 | -2.447820 | -0.103450 |
| C | -0.821062 | -3.441111 | -0.057959 |
| H | -1.009040 | -4.507841 | -0.106079 |
| C | -1.065086 | 1.190431  | 0.050744  |
| C | -3.238484 | -2.650416 | -0.196628 |
| C | -6.042669 | -3.129787 | -0.416175 |
| C | -5.214196 | 3.990756  | -0.325190 |
| H | -5.651132 | 4.855039  | -0.830828 |
| C | -3.238484 | 2.650416  | 0.196626  |
| C | 3.033533  | -2.827964 | 0.047673  |
| C | -3.843786 | 3.758707  | -0.432476 |
| H | -3.231240 | 4.437660  | -1.027842 |
| C | -5.214196 | -3.990756 | 0.325188  |
| H | -5.651132 | -4.855039 | 0.830826  |
| C | -1.786145 | 2.447820  | 0.103449  |
| C | 1.756746  | 3.495333  | -0.055207 |
| C | 0.466185  | 2.809255  | -0.003900 |
| C | -0.821062 | 3.441111  | 0.057959  |
| H | -1.009040 | 4.507841  | 0.106079  |
| C | -5.440667 | 2.030153  | 1.045143  |
| H | -6.055817 | 1.348396  | 1.636690  |
| C | 1.752906  | 4.913961  | -0.114843 |
| H | 0.796738  | 5.434651  | -0.128701 |
| C | 0.856059  | 0.020452  | -3.113137 |
| H | -0.094925 | 0.036417  | -2.582642 |
| C | 2.913501  | -5.672050 | 0.162257  |
| H | 2.857792  | -6.759892 | 0.209407  |
| C | 4.206306  | -3.629043 | 0.093261  |
| H | 5.163496  | -3.105030 | 0.084117  |
| C | -3.843786 | -3.758706 | 0.432474  |
| H | -3.231241 | -4.437659 | 1.027841  |
| C | -4.068044 | 1.789066  | 0.938494  |
| H | -3.630408 | 0.930921  | 1.444934  |
| C | 2.137620  | 0.001459  | 5.142945  |
| H | 2.204177  | 0.003172  | 6.231508  |
| C | 4.156770  | 5.014268  | -0.149500 |
| H | 5.084469  | 5.589106  | -0.185204 |
| C | 3.033533  | 2.827963  | -0.047671 |
| C | 4.206307  | 3.629043  | -0.093258 |
| H | 5.163496  | 3.105029  | -0.084114 |
| C | 0.856058  | -0.020448 | 3.113138  |



|   |           |           |           |
|---|-----------|-----------|-----------|
| H | -0.094927 | -0.036411 | 2.582643  |
| C | 3.163081  | -0.016901 | -2.971347 |
| H | 4.038965  | -0.031019 | -2.323976 |
| C | 2.913502  | 5.672049  | -0.162256 |
| H | 2.857793  | 6.759892  | -0.209406 |
| C | 2.137622  | -0.001458 | -5.142944 |
| H | 2.204180  | -0.003172 | -6.231506 |
| C | 3.293703  | 0.019272  | 4.359005  |
| H | 4.285084  | 0.035127  | 4.810200  |
| C | 3.293705  | -0.019275 | -4.359003 |
| H | 4.285087  | -0.035133 | -4.810197 |
| C | 0.894504  | -0.018701 | 4.506427  |
| H | -0.034720 | -0.033198 | 5.074690  |
| C | 4.156769  | -5.014268 | 0.149502  |
| H | 5.084468  | -5.589106 | 0.185207  |
| C | 0.894506  | 0.018705  | -4.506426 |
| H | -0.034718 | 0.033204  | -5.074689 |
| C | 3.163079  | 0.016898  | 2.971349  |
| H | 4.038964  | 0.031013  | 2.323979  |
| H | -7.737642 | -4.418875 | -0.815063 |
| H | -8.022729 | -3.221825 | 0.455707  |
| H | -7.997862 | -2.710099 | -1.245635 |
| H | -7.737642 | 4.418876  | 0.815058  |
| H | -7.997862 | 2.710101  | 1.245632  |
| H | -8.022729 | 3.221823  | -0.455710 |

#### 4b

|                                     |              |                |
|-------------------------------------|--------------|----------------|
| Imaginary Freq                      | 0            |                |
| Temperature                         | 298.150      | Kelvin         |
| Pressure                            | 1.00000      | atm            |
| Frequencies scaled by               | 1.0000       |                |
| Electronic Energy (EE)              | -2274.115932 | Hartree        |
| Zero-point Energy Correction        | 0.678338     | Hartree        |
| Thermal Correction to Energy        | 0.725240     | Hartree        |
| Thermal Correction to Enthalpy      | 0.726185     | Hartree        |
| Thermal Correction to Free Energy   | 0.590678     | Hartree        |
| EE + Zero-point Energy              | -2273.437595 | Hartree        |
| EE + Thermal Energy Correction      | -2273.390692 | Hartree        |
| EE + Thermal Enthalpy Correction    | -2273.389748 | Hartree        |
| EE + Thermal Free Energy Correction | -2273.525254 | Hartree        |
| E (Thermal)                         | 455.095      | kcal/mol       |
| Heat Capacity (Cv)                  | 180.512      | cal/mol-kelvin |
| Entropy (S)                         | 285.198      | cal/mol-kelvin |

|    |           |           |           |
|----|-----------|-----------|-----------|
| In | -2.287835 | 0.000005  | 0.000003  |
| O  | 6.959919  | -3.270370 | 0.574065  |
| O  | -3.626027 | 1.518222  | -0.048641 |

|   |           |           |           |
|---|-----------|-----------|-----------|
| N | 1.230054  | -0.000001 | -0.000006 |
| N | -0.723071 | -1.461298 | 0.044851  |
| N | -0.723066 | 1.461303  | -0.044852 |
| O | -3.626032 | -1.518208 | 0.048653  |
| C | 5.608674  | -3.131520 | 0.429209  |
| N | -2.385802 | 0.073950  | 2.354747  |
| C | 3.680432  | 1.727293  | -0.875118 |
| H | 3.263893  | 0.818127  | -1.303024 |
| O | 6.959927  | 3.270347  | -0.574112 |
| N | -2.385813 | -0.073940 | -2.354740 |
| C | -2.177950 | 3.494772  | -0.066539 |
| C | -0.886005 | 2.808413  | -0.085569 |
| C | 0.646110  | 1.189466  | -0.080274 |
| C | 5.047384  | 1.963240  | -0.972426 |
| H | 5.700903  | 1.248654  | -1.474318 |
| C | -2.175691 | 4.914539  | -0.064732 |
| H | -1.220042 | 5.436294  | -0.070857 |
| C | 1.368426  | 2.445647  | -0.161705 |
| C | 0.400000  | 3.438660  | -0.156310 |
| H | 0.585659  | 4.503876  | -0.234971 |
| C | 0.646106  | -1.189467 | 0.080265  |
| C | 2.820349  | 2.649221  | -0.238201 |
| C | 5.608682  | 3.131502  | -0.429248 |
| C | 4.776929  | -4.060990 | -0.213250 |
| H | 5.178669  | -4.971166 | -0.653818 |
| C | 2.820341  | -2.649229 | 0.238179  |
| C | -3.454189 | 2.826701  | -0.050523 |
| C | 3.404424  | -3.810994 | -0.299109 |
| H | 2.775899  | -4.536580 | -0.817244 |
| C | 4.776945  | 4.060975  | 0.213217  |
| H | 5.178690  | 4.971149  | 0.653784  |
| C | 1.368418  | -2.445650 | 0.161691  |
| C | -2.177962 | -3.494762 | 0.066547  |
| C | -0.886015 | -2.808408 | 0.085569  |
| C | 0.399989  | -3.438660 | 0.156303  |
| H | 0.585644  | -4.503876 | 0.234963  |
| C | 5.047383  | -1.963255 | 0.972390  |
| H | 5.700907  | -1.248672 | 1.474278  |
| C | -2.175708 | -4.914530 | 0.064741  |
| H | -1.220061 | -5.436288 | 0.070862  |
| C | -1.275642 | -0.132357 | -3.112019 |
| H | -0.324751 | -0.145093 | -2.581203 |
| C | -3.337014 | 5.673134  | -0.051111 |
| H | -3.282111 | 6.762060  | -0.048840 |
| C | -4.627713 | 3.627970  | -0.039314 |
| H | -5.584396 | 3.102998  | -0.029245 |

|   |           |           |           |
|---|-----------|-----------|-----------|
| C | 3.404439  | 3.810983  | 0.299084  |
| H | 2.775920  | 4.536571  | 0.817224  |
| C | 3.680431  | -1.727304 | 0.875090  |
| H | 3.263898  | -0.818136 | 1.302998  |
| C | -2.557766 | 0.157633  | 5.141465  |
| H | -2.624858 | 0.190275  | 6.229510  |
| C | 7.578864  | -4.447818 | 0.046748  |
| H | 7.176748  | -5.353941 | 0.524040  |
| H | 8.644415  | -4.352335 | 0.280094  |
| H | 7.445140  | -4.511133 | -1.043543 |
| C | -4.579709 | -5.014417 | 0.039347  |
| H | -5.508002 | -5.589335 | 0.029076  |
| C | -3.454198 | -2.826687 | 0.050536  |
| C | -4.627726 | -3.627952 | 0.039335  |
| H | -5.584407 | -3.102977 | 0.029270  |
| C | -1.275627 | 0.132365  | 3.112020  |
| H | -0.324738 | 0.145099  | 2.581200  |
| C | -3.581747 | -0.056867 | -2.971430 |
| H | -4.456798 | -0.008095 | -2.324599 |
| C | -3.337033 | -5.673121 | 0.051127  |
| H | -3.282135 | -6.762047 | 0.048857  |
| C | -2.557790 | -0.157623 | -5.141458 |
| H | -2.624887 | -0.190264 | -6.229503 |
| C | -3.713071 | 0.097541  | 4.358468  |
| H | -4.704342 | 0.081773  | 4.809926  |
| C | -3.713092 | -0.097528 | -4.358456 |
| H | -4.704365 | -0.081759 | -4.809909 |
| C | -1.314741 | 0.175148  | 4.504668  |
| H | -0.386120 | 0.221476  | 5.072225  |
| C | -4.579692 | 5.014435  | -0.039325 |
| H | -5.507983 | 5.589356  | -0.029049 |
| C | 7.578879  | 4.447793  | -0.046797 |
| H | 7.445162  | 4.511107  | 1.043494  |
| C | -1.314762 | -0.175140 | -4.504667 |
| H | -0.386144 | -0.221470 | -5.072228 |
| C | -3.581733 | 0.056879  | 2.971442  |
| H | -4.456787 | 0.008108  | 2.324615  |
| H | 8.644428  | 4.352307  | -0.280150 |
| H | 7.176763  | 5.353917  | -0.524087 |

## UV-Vis Calculations with TD-DFT<sup>2</sup>

Theory Level: **1a-b, 2a-b and 3a-b:** TD-DFT (B3LYP/jul-cc-pvDz) // DFT(B3LYP/jul-cc-pvDz)  
**4a-b:** TD-DFT (B3LYP/LANL2DZ) // DFT (B3LYP/LANL2DZ)

| Structure | Solvent  | $\lambda_{\max}$ (nm) | Excitation Energy (eV) | Oscillator Strength |
|-----------|----------|-----------------------|------------------------|---------------------|
| <b>1a</b> | Methanol | 651.99                | 1.9016                 | 0.5438              |
| <b>1a</b> | Methanol | 664.42                | 1.8661                 | 0.5858              |
| <b>2a</b> | Methanol | 689.14                | 1.7991                 | 0.5213              |
| <b>2b</b> | Methanol | 689.19                | 1.7990                 | 0.552               |
| <b>3a</b> | Methanol | 687.73                | 1.8028                 | 0.5241              |
| <b>3b</b> | Methanol | 688.02                | 1.8021                 | 0.5539              |
| <b>4a</b> | Methanol | 661.47                | 1.8744                 | 0.6207              |
| <b>4b</b> | Methanol | 664.89                | 1.8647                 | 0.646               |

**Table S1.** UV-Vis of **1a-b, 2a-b, 3a-b,** and **4a-b** in MeOH as implicit solvent.

| Structure | HOMO (eV) | LUMO (eV) |
|-----------|-----------|-----------|
| <b>1a</b> | -5.56     | -3.66     |
| <b>1b</b> | -5.21     | -3.43     |
| <b>2a</b> | -5.00     | -3.20     |
| <b>2b</b> | -4.97     | -3.17     |
| <b>3a</b> | -5.01     | -3.21     |
| <b>3b</b> | -4.98     | -3.17     |
| <b>4a</b> | -5.01     | -3.14     |
| <b>4b</b> | -4.98     | -3.11     |

**Table S2.** HOMO and LUMO energies of **1a-b, 2a-b, 3a-b,** and **4a-b** in MeOH as implicit solvent.  
**Molecular Orbital Diagrams**

Theory Level: **1a-b, 2a-b,** and **3a-b:** TD-DFT (B3LYP/jul-cc-pvDz) // DFT(B3LYP/jul-cc-pvDz)  
**4a-b:** TD-DFT (B3LYP/LANL2DZ) // DFT (B3LYP/LANL2DZ)

Notes: Natural Transition Orbitals (NTO) calculated for the first excited state during the TD-DFT calculations. HOMO and LUMO visualized using GaussView.

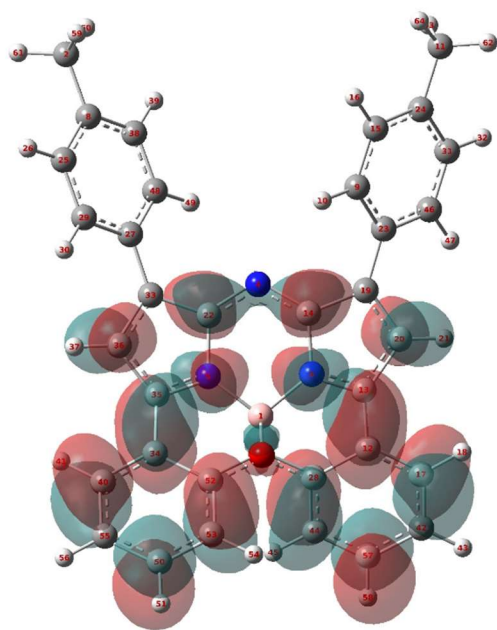

**LUMO+1**

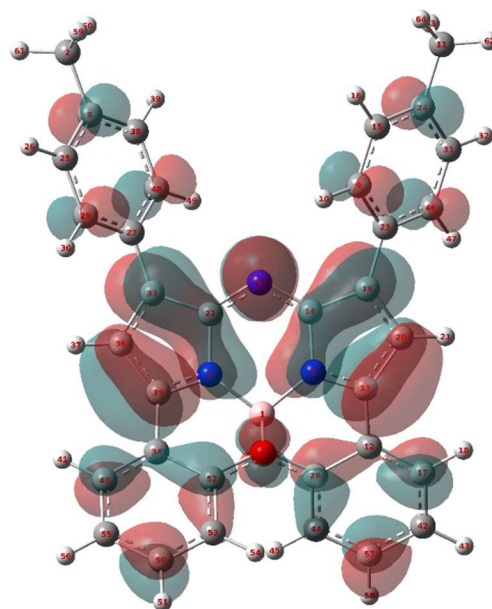

**LUMO**

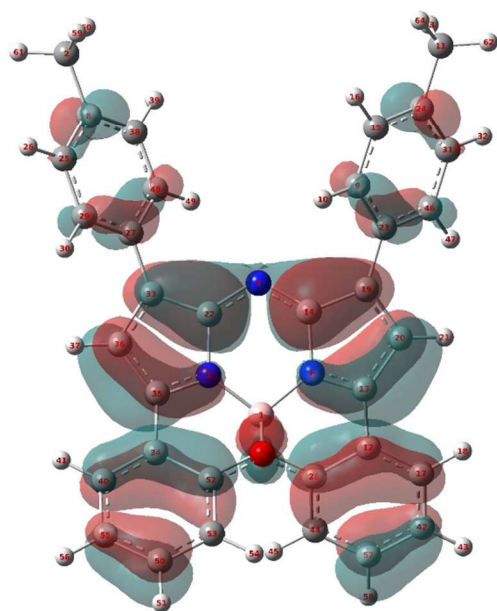

**HOMO**

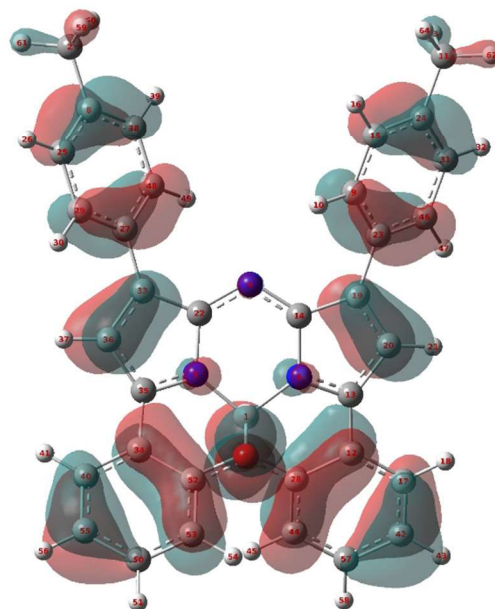

**HOMO-1**

**Figure S1.** Frontier Molecular Orbital Plots of **1a**.

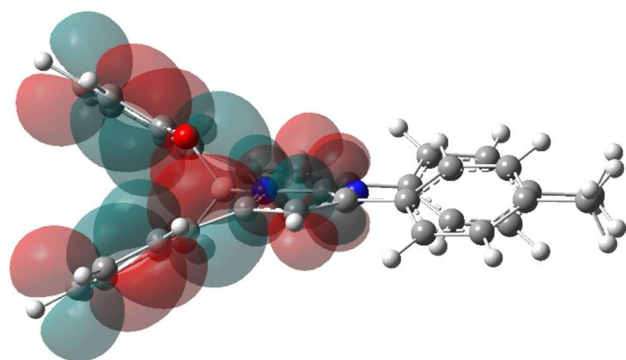

**LUMO+1**

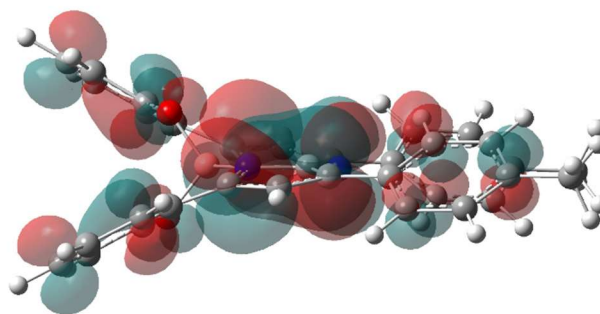

**LUMO**

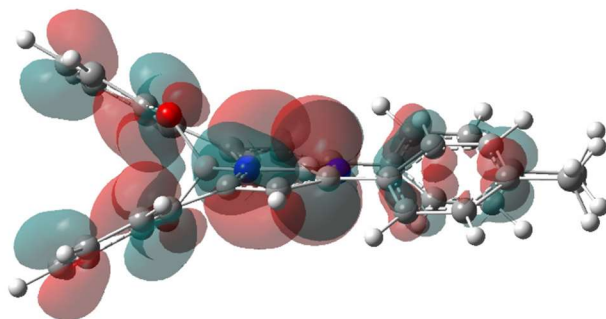

**HOMO**

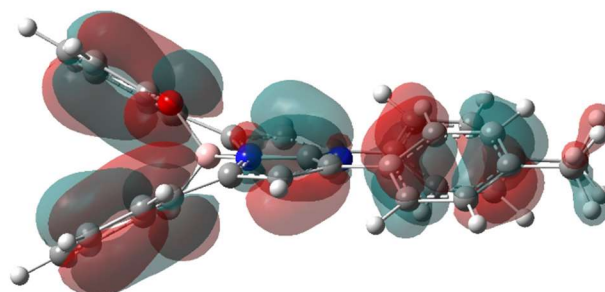

**HOMO-1**

**Figure S2.** Horizontal view of Frontier Molecular Orbital Plots of **1a**.

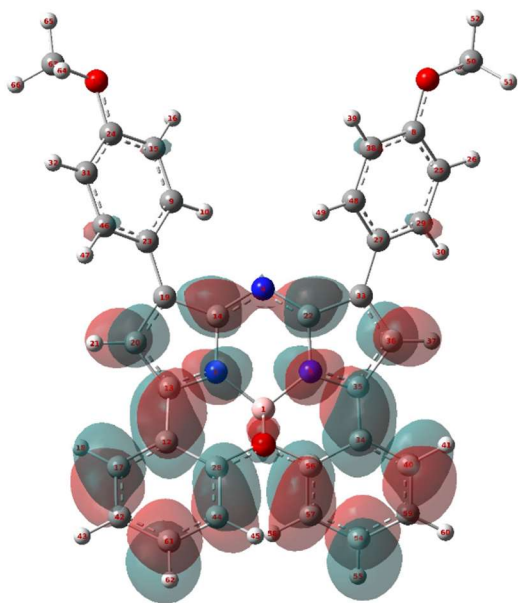

**LUMO+1**

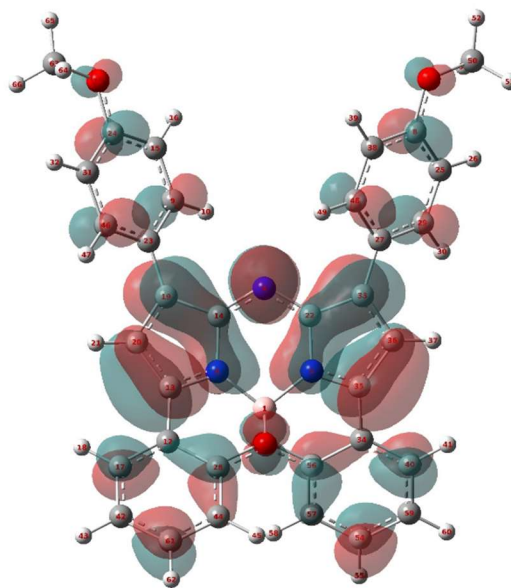

**LUMO**

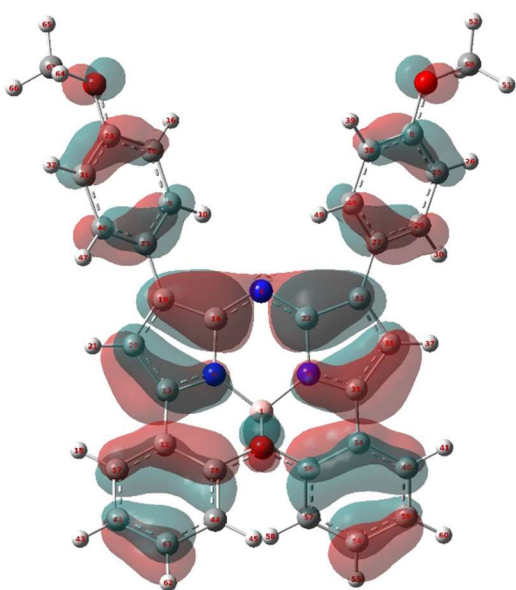

**HOMO**

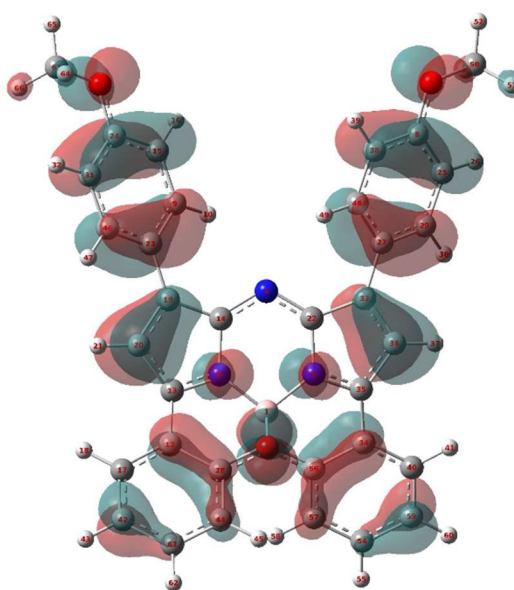

**HOMO-1**

**Figure S3.** Frontier Molecular Orbital Plots of **1b**.



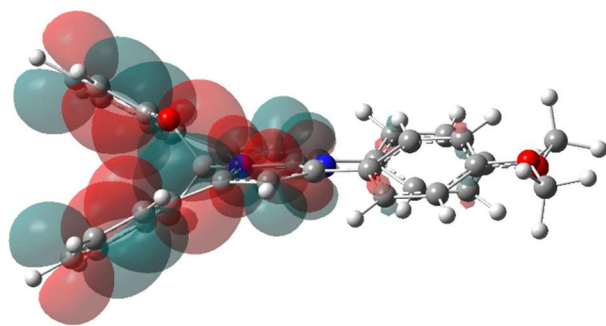

**LUMO+1**

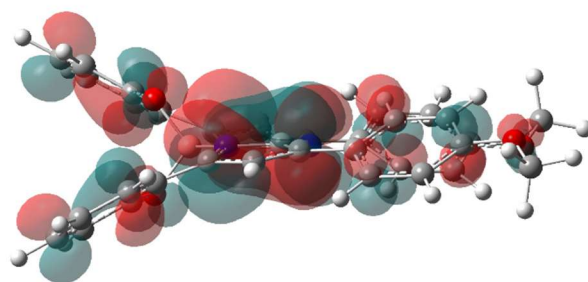

**LUMO**

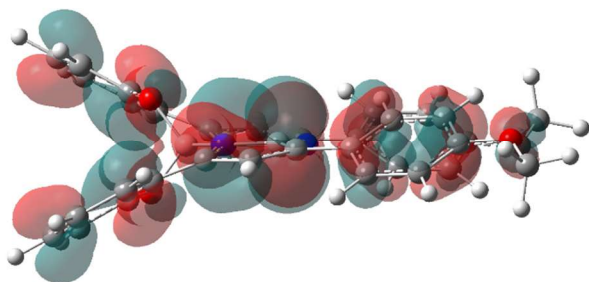

**HOMO**

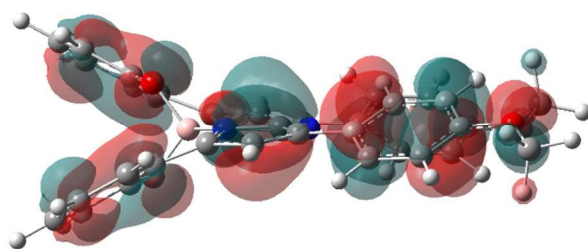

**HOMO-1**

**Figure S4.** Horizontal view of Frontier Molecular Orbital Plots of **1b**.



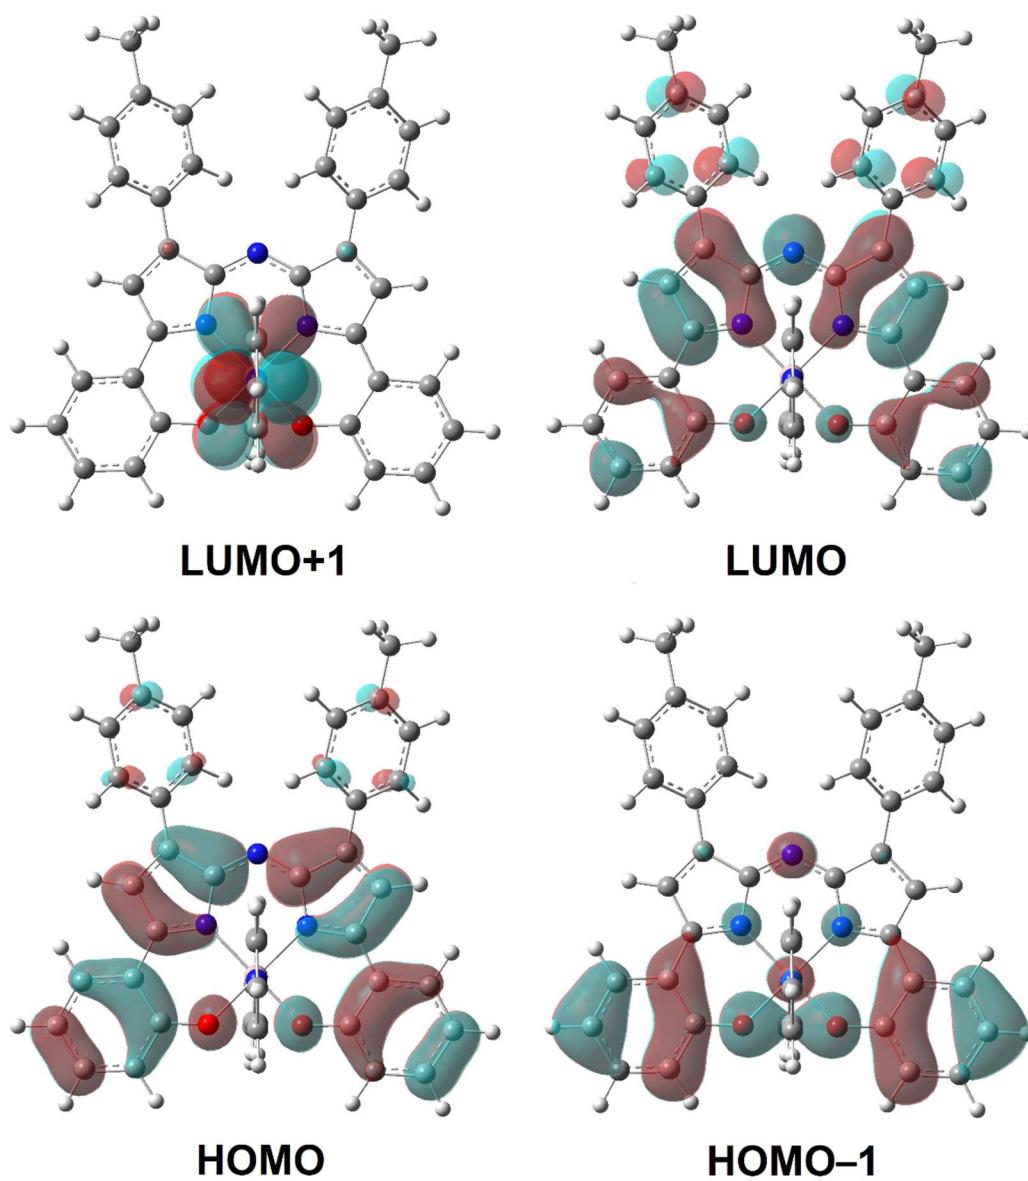

**Figure S5.** Frontier Molecular Orbital Plots of **2a**.

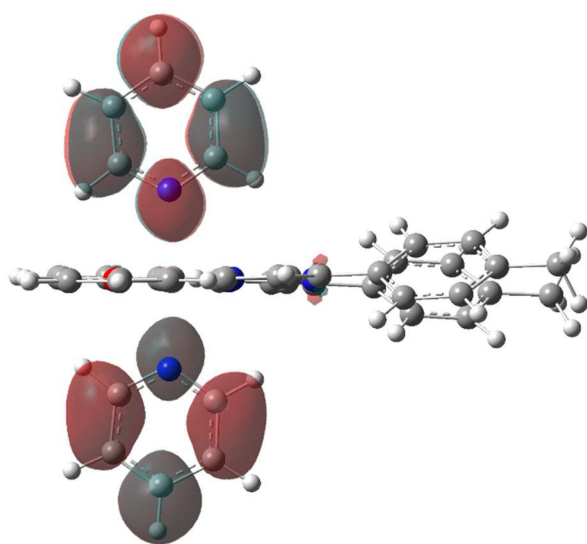

**LUMO+1**

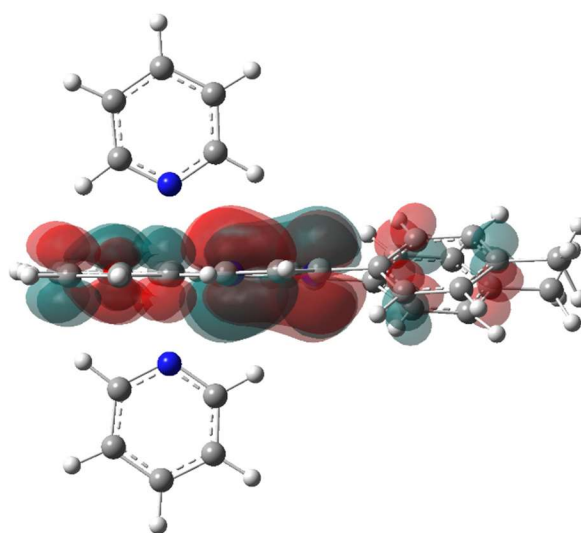

**LUMO**

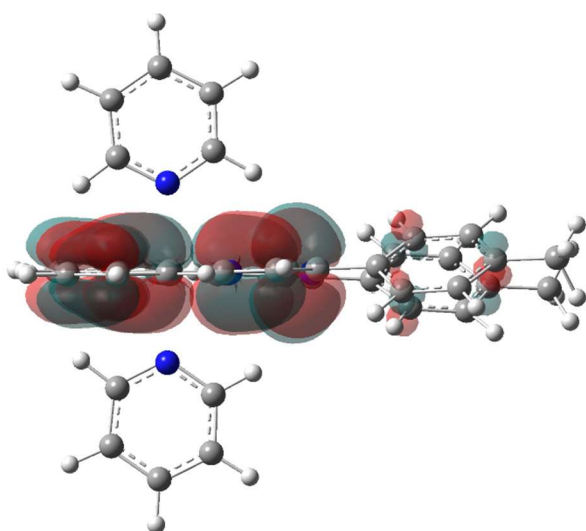

**HOMO**

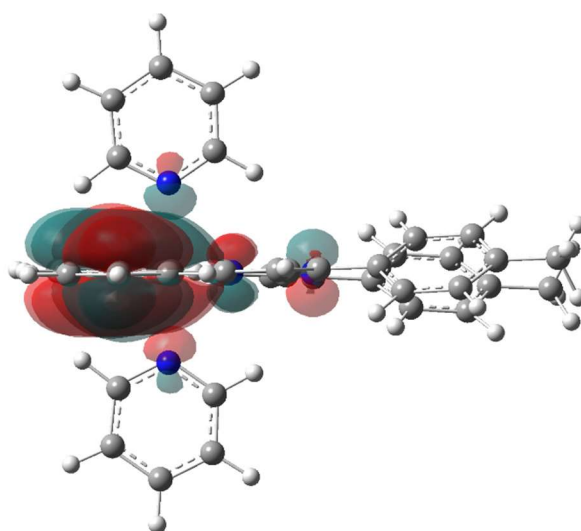

**HOMO-1**

**Figure S6.** Horizontal view of Frontier Molecular Orbital Plots of **2a**.

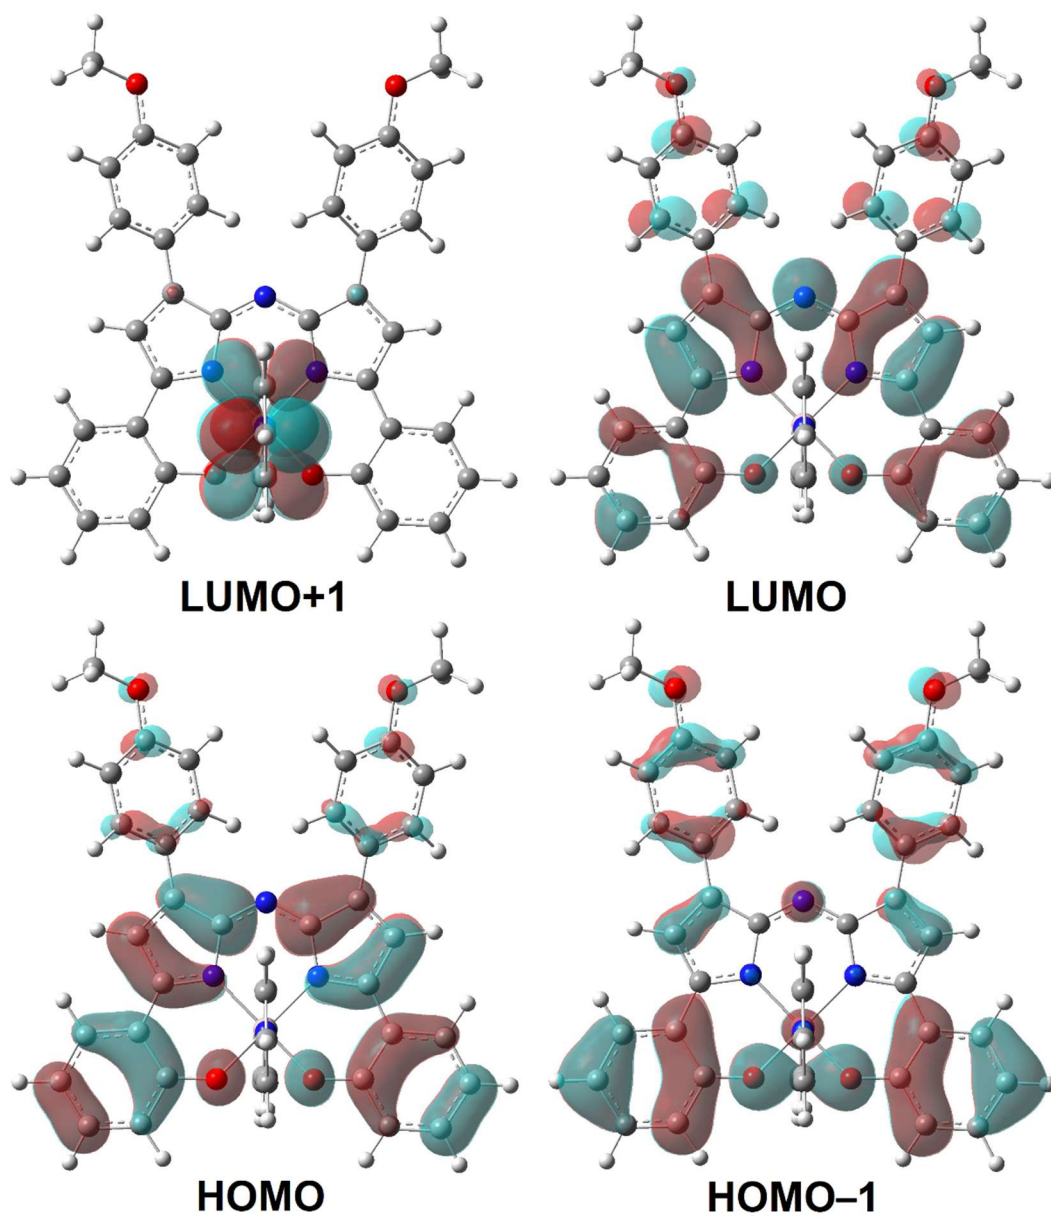

**Figure S7.** Frontier Molecular Orbital Plots of **2b**.

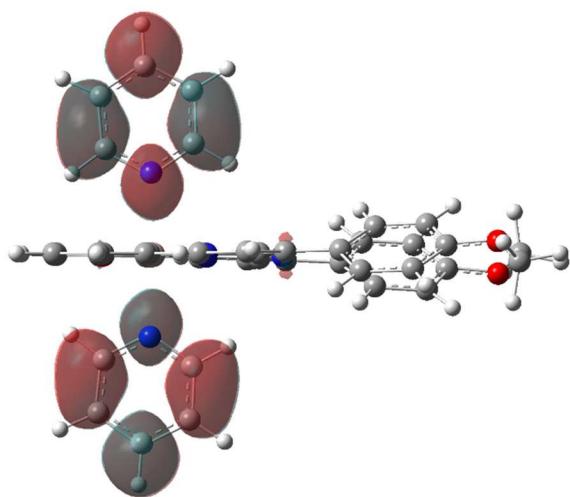

**LUMO+1**

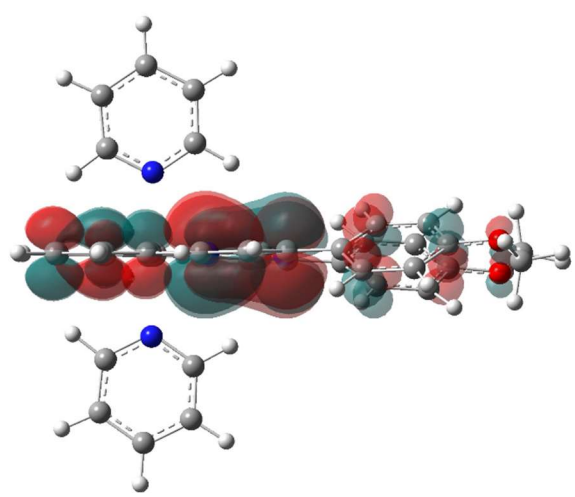

**LUMO**

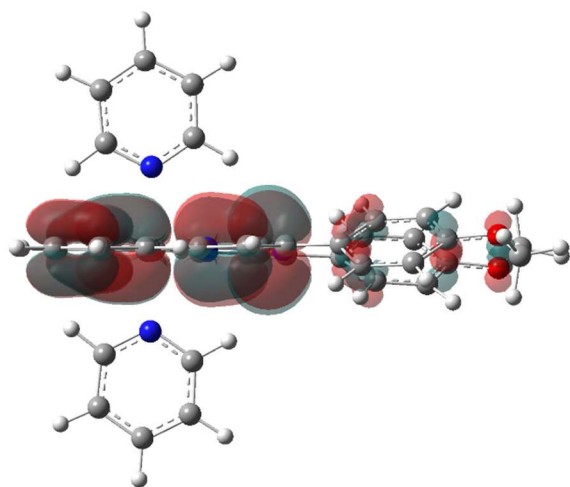

**HOMO**

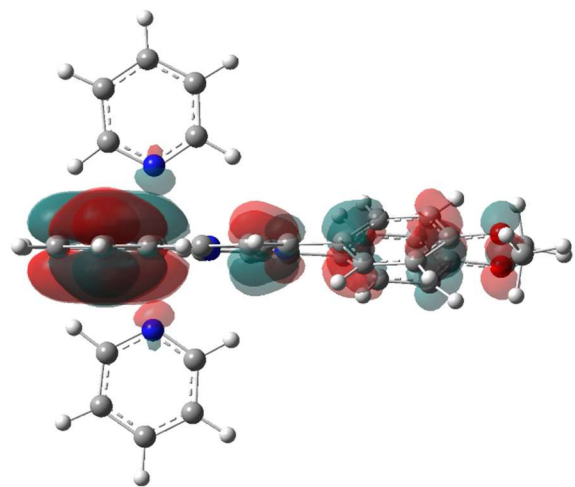

**HOMO-1**

**Figure S8.** Horizontal view of Frontier Molecular Orbital Plots of **2b**.

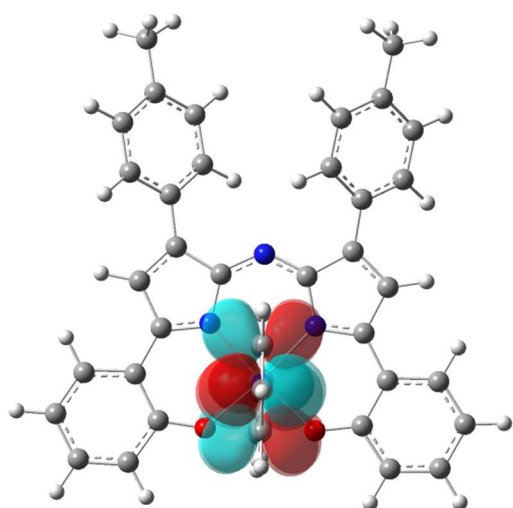

**LUMO+1**

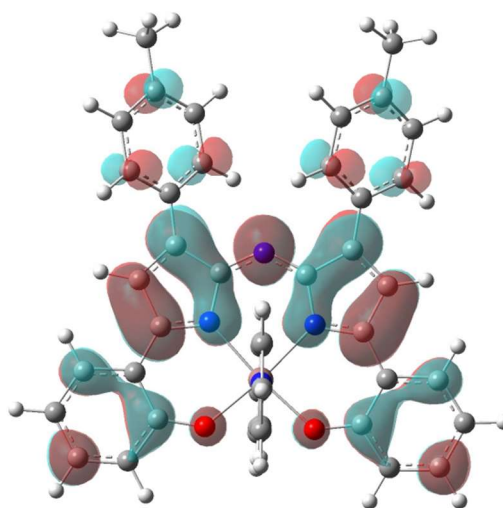

**LUMO**

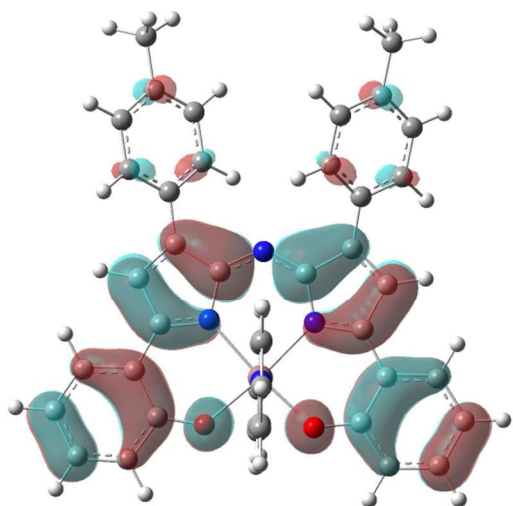

**HOMO**

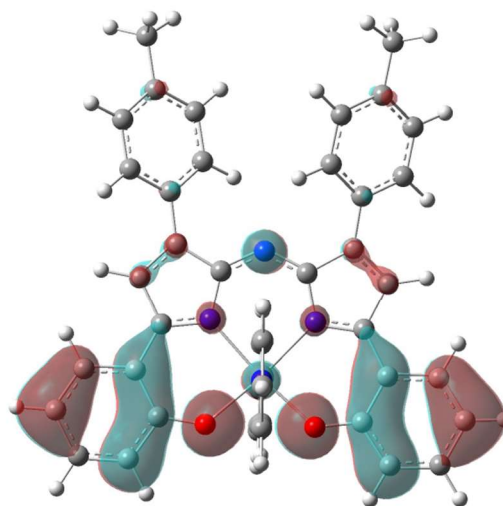

**HOMO-1**

**Figure S9.** Frontier Molecular Orbital Plots of **3a**.



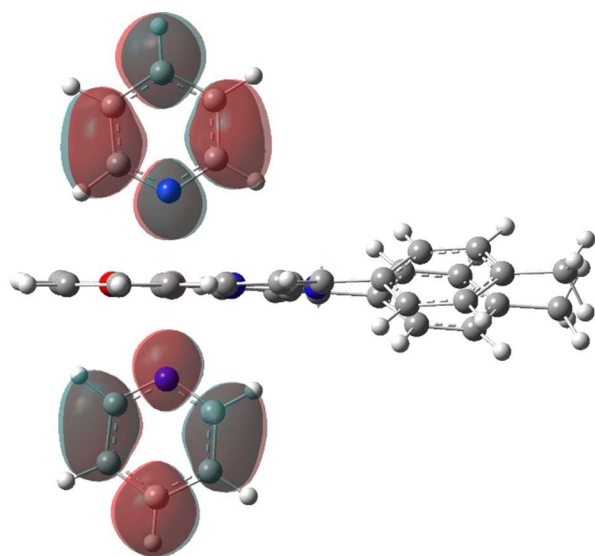

**LUMO+1**

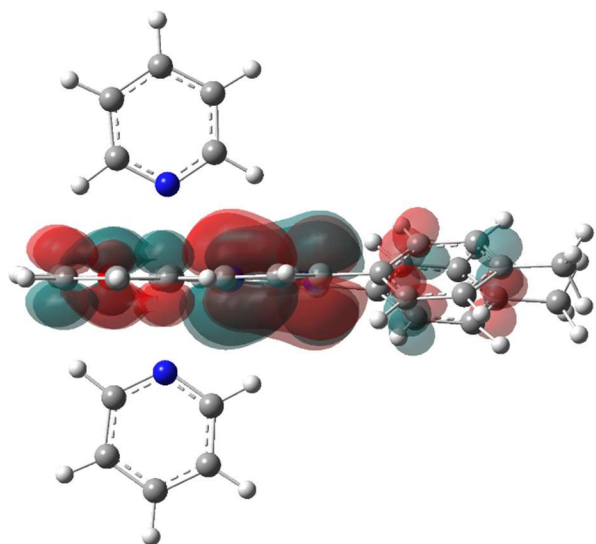

**LUMO**

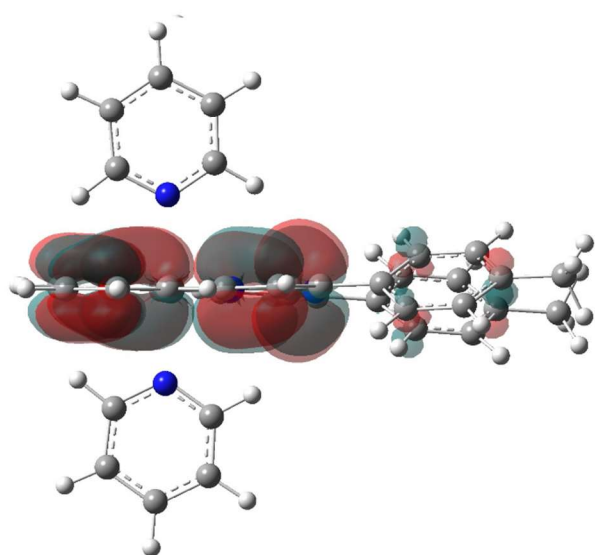

**HOMO**

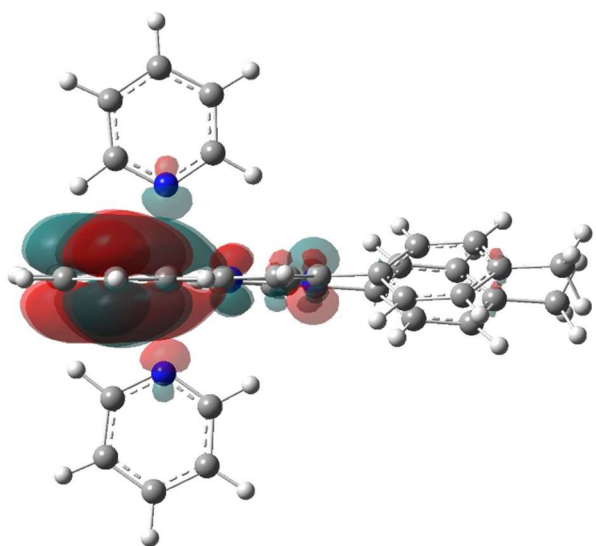

**HOMO-1**

**Figure S10.** Horizontal view of Frontier Molecular Orbital Plots of **3a**.

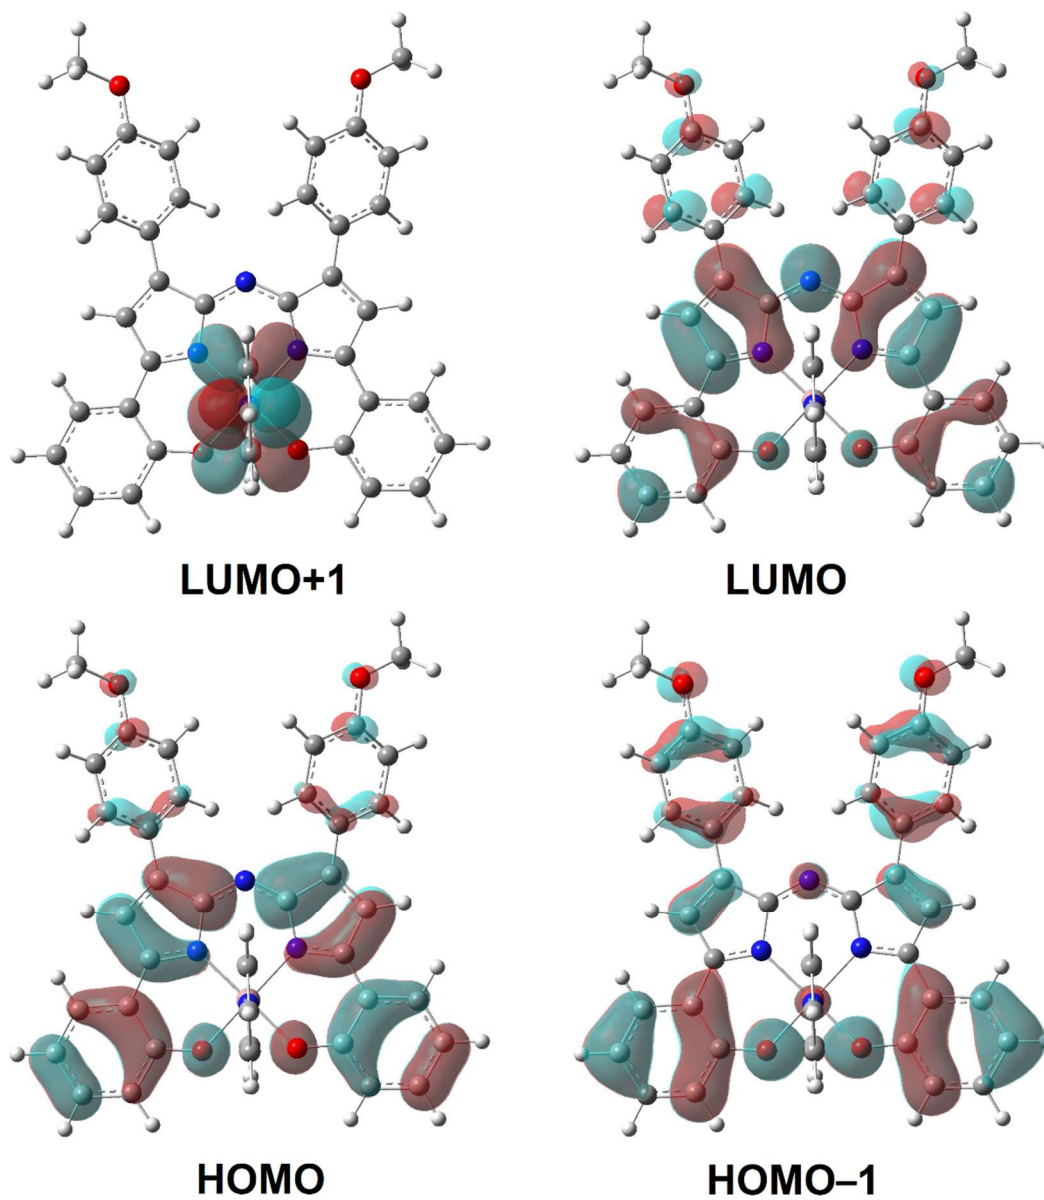

**Figure S11.** Frontier Molecular Orbital Plots of **3b**.

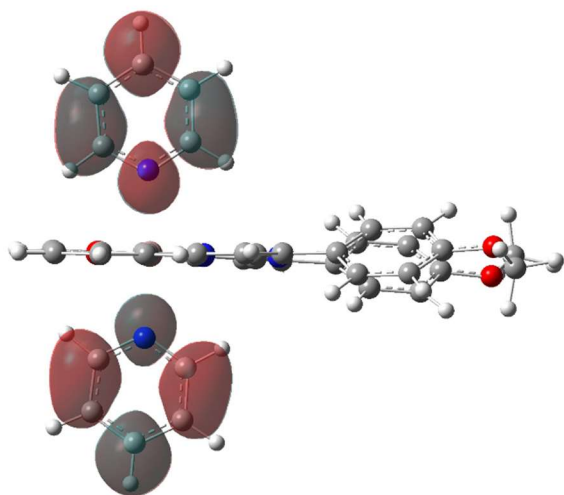

**LUMO+1**

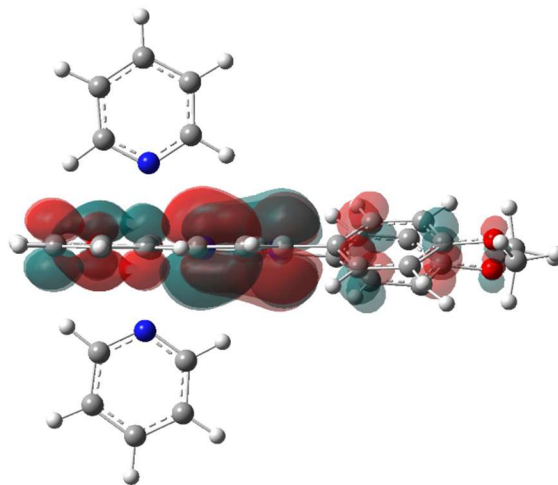

**LUMO**

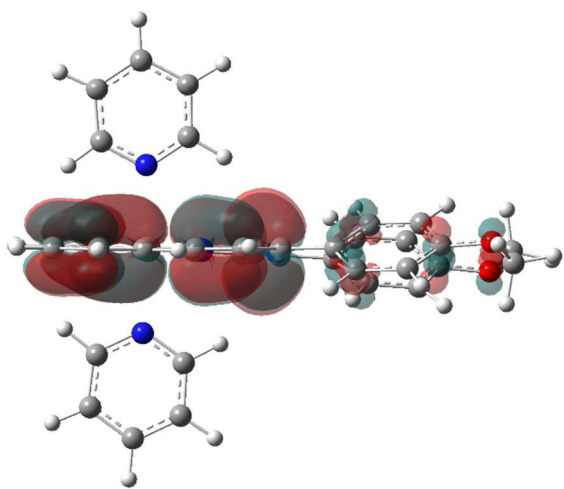

**HOMO**

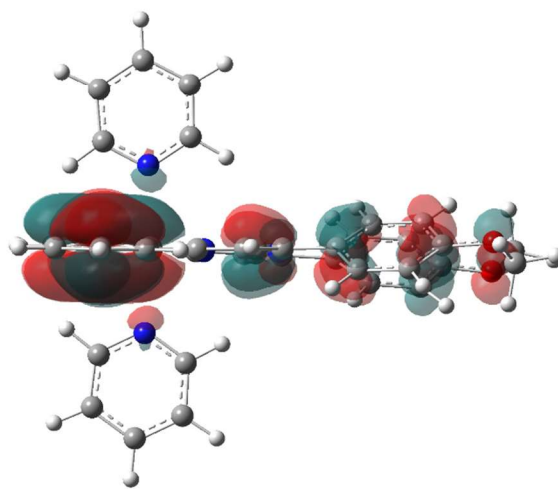

**HOMO-1**

**Figure S12.** Horizontal view of Frontier Molecular Orbital Plots of **3b**.



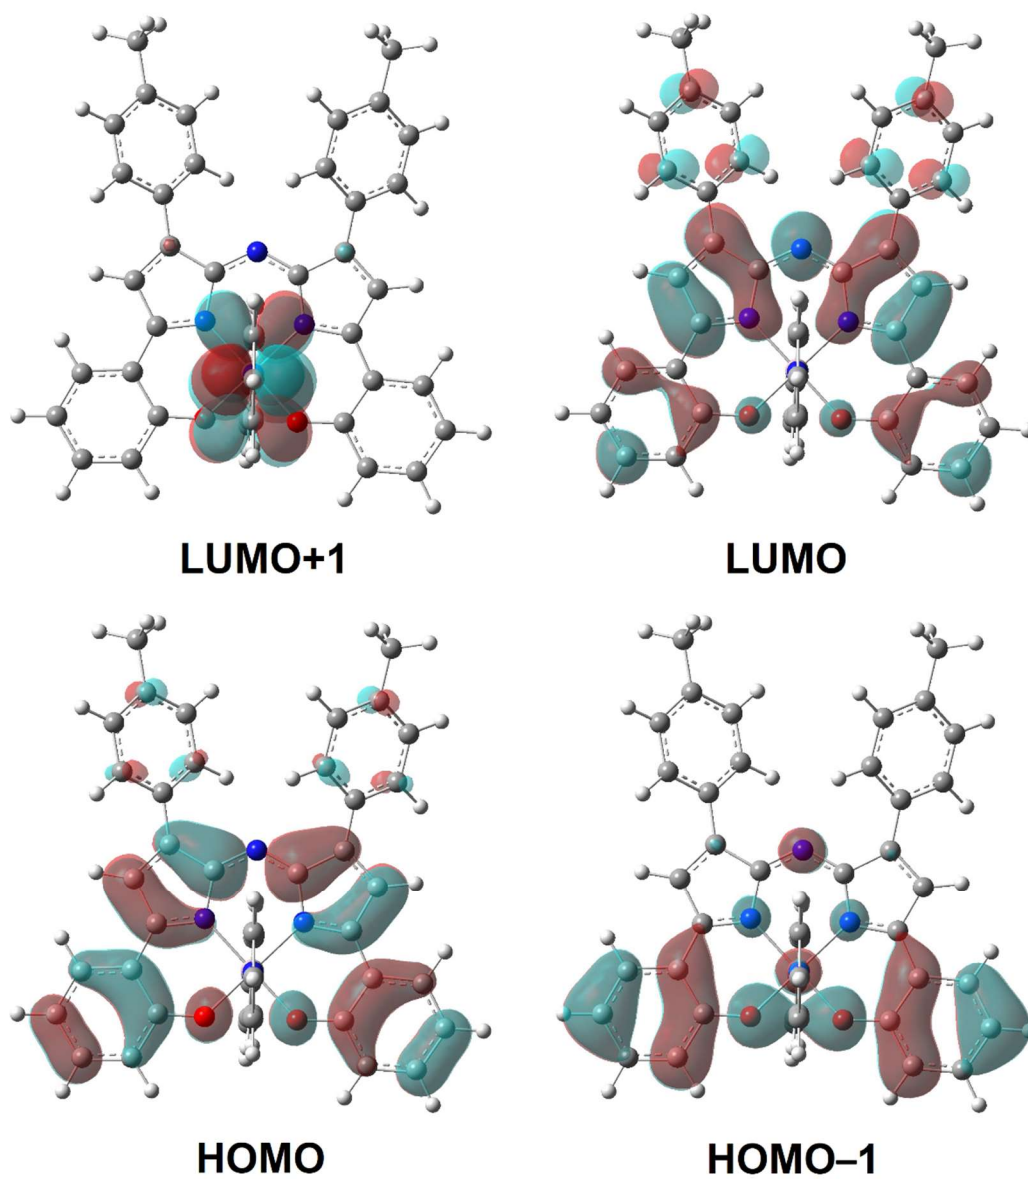

**Figure S13.** Frontier Molecular Orbital Plots of **4a**.

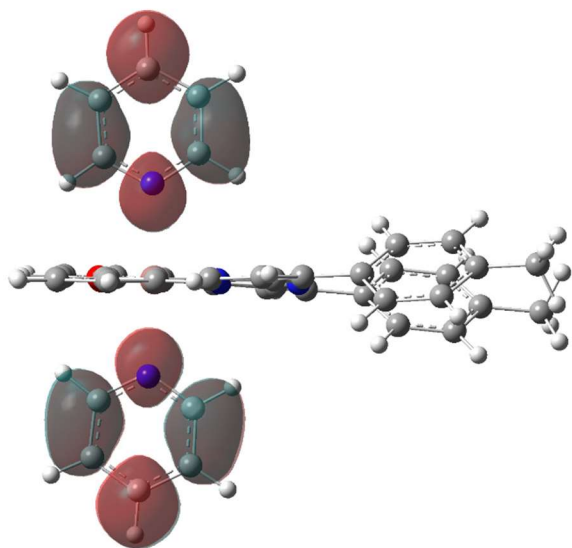

**LUMO+1**

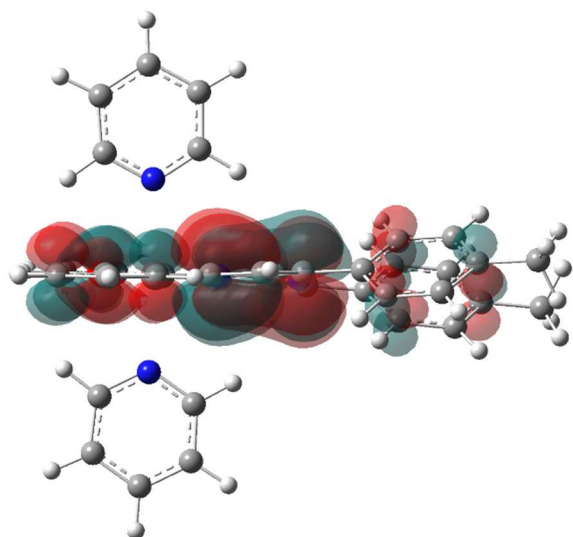

**LUMO**

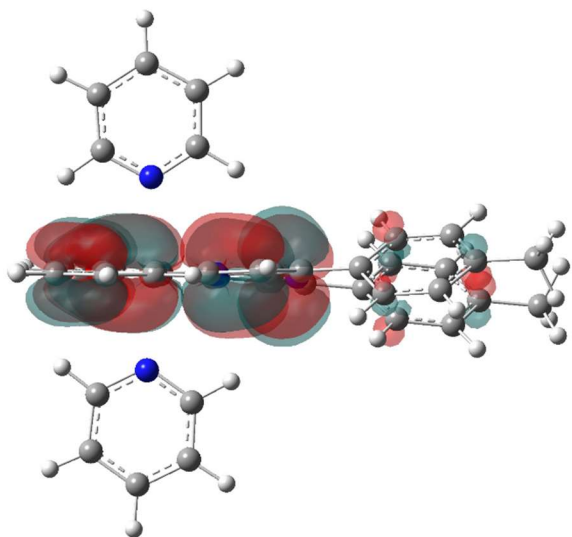

**HOMO**

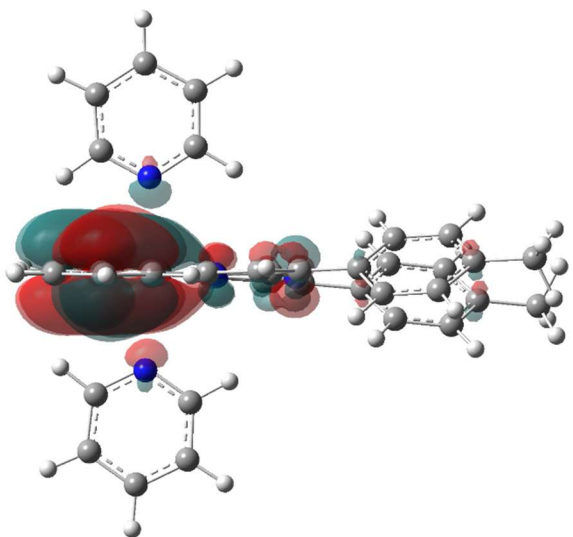

**HOMO-1**

**Figure S14.** Horizontal view of Frontier Molecular Orbital Plots of **4a**.

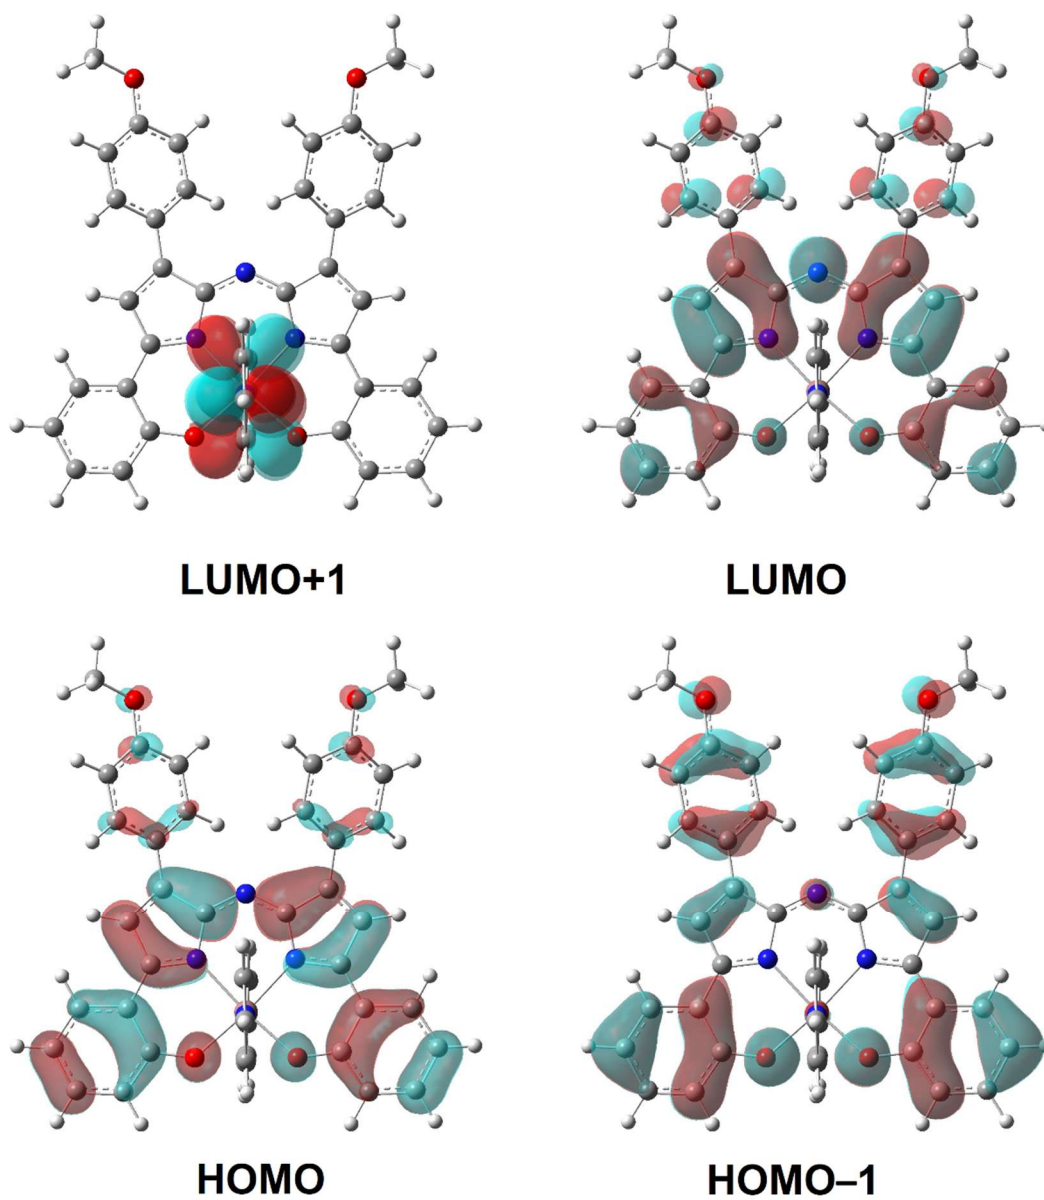

**Figure S15.** Frontier Molecular Orbital Plots of **4b**.

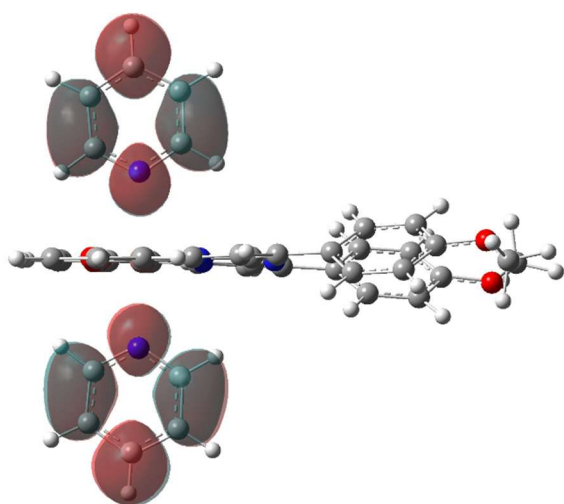

**LUMO+1**

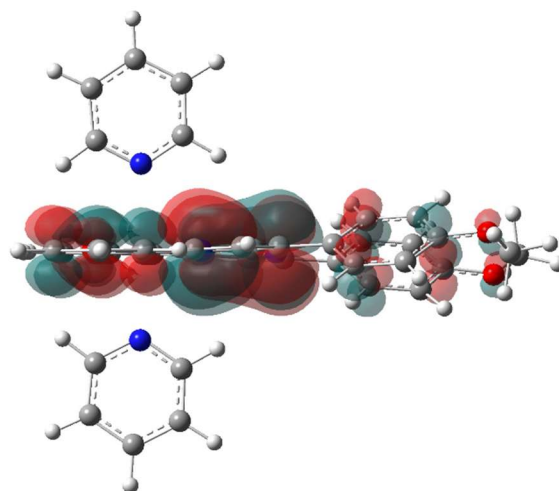

**LUMO**

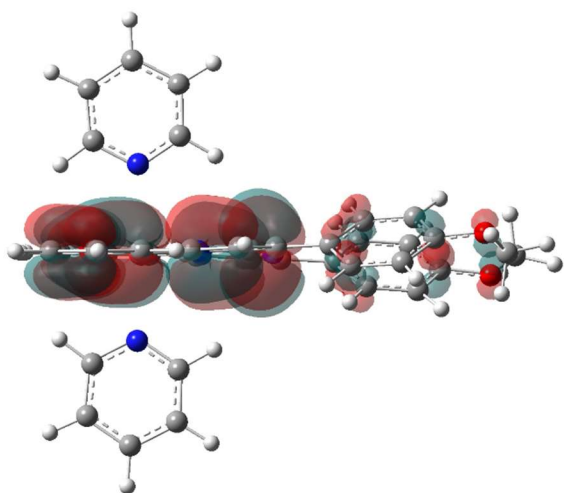

**HOMO**

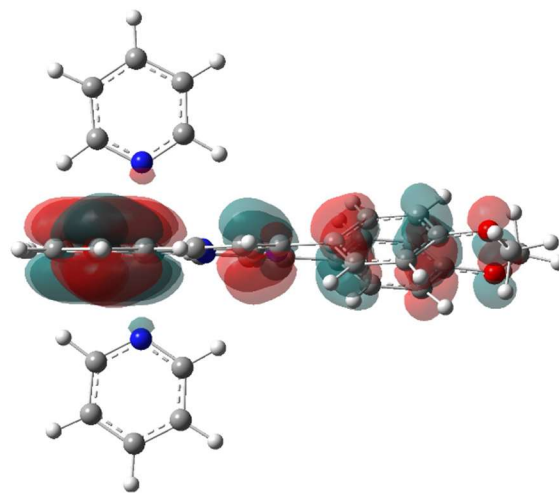

**HOMO-1**

**Figure S16.** Horizontal view of Frontier Molecular Orbital Plots of **4b**.

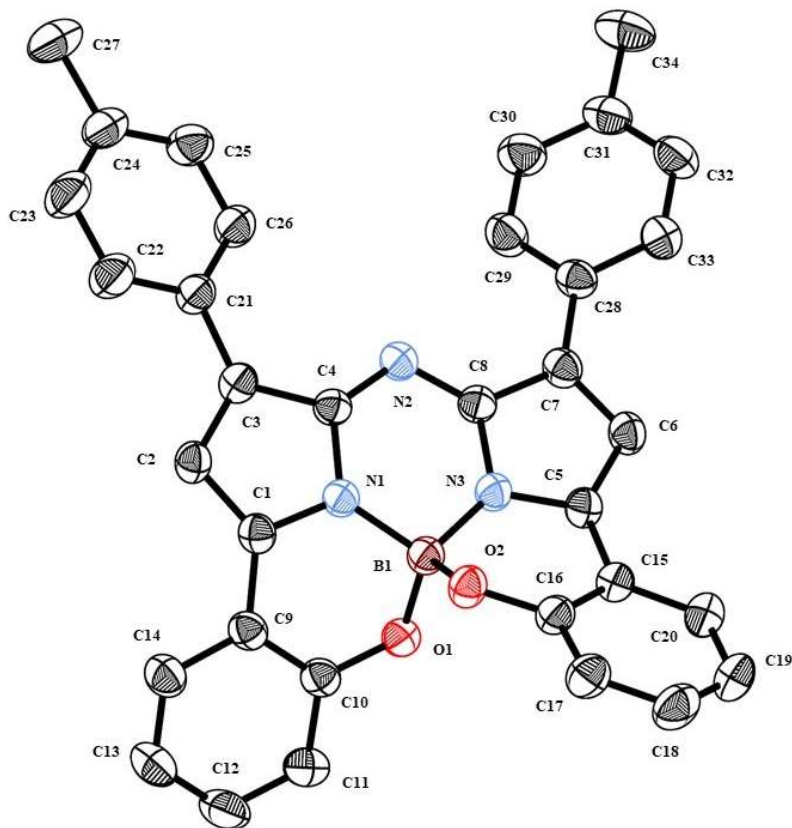

**Figure S17.** Single crystal X-ray diffraction structure of **1a**; ellipsoids are drawn at the 40% probability level. Hydrogen atoms omitted for clarity.

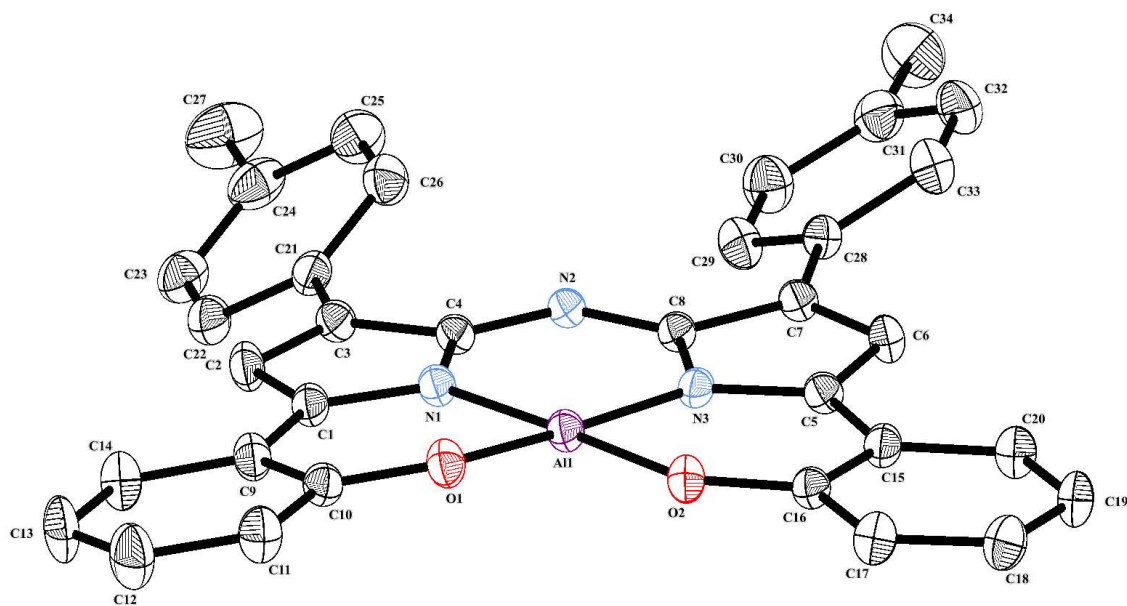

**Figure S18.** Single crystal X-ray diffraction structure of **2a**; ellipsoids are drawn at the 40% probability level. Axial bound pyridine ligands and hydrogen atoms omitted for clarity.



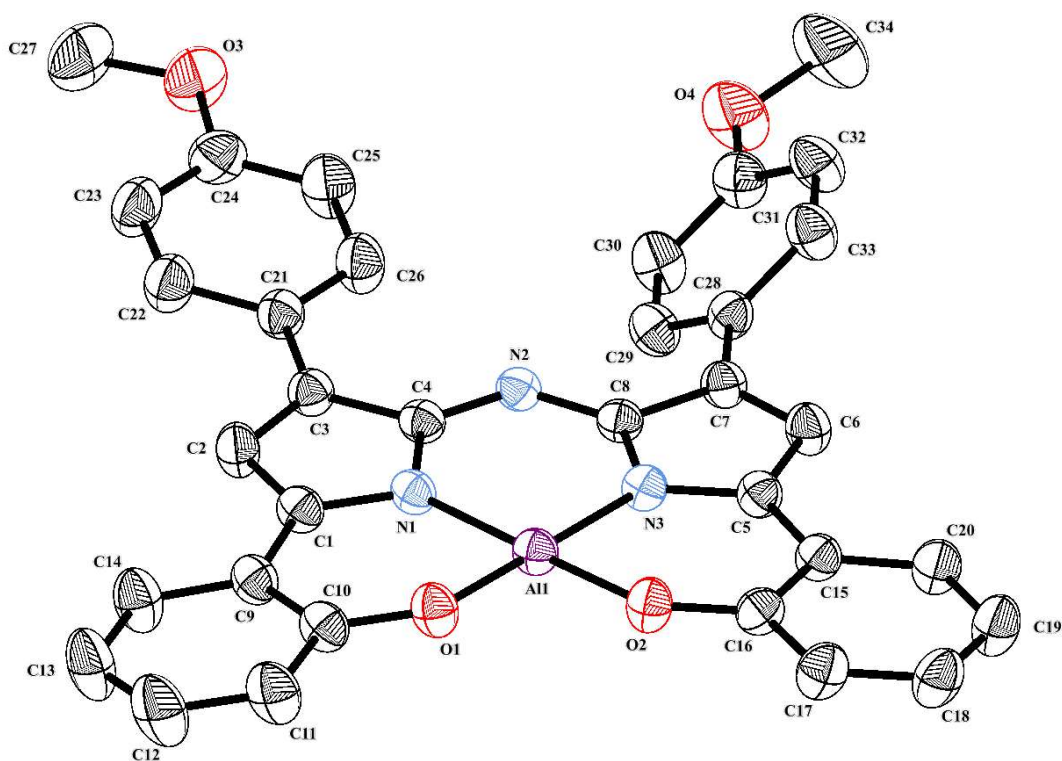

**Figure S19.** Single crystal X-ray diffraction structure of **2b**; ellipsoids are drawn at the 40% probability level. Axial bound pyridine ligands and hydrogen atoms omitted for clarity.

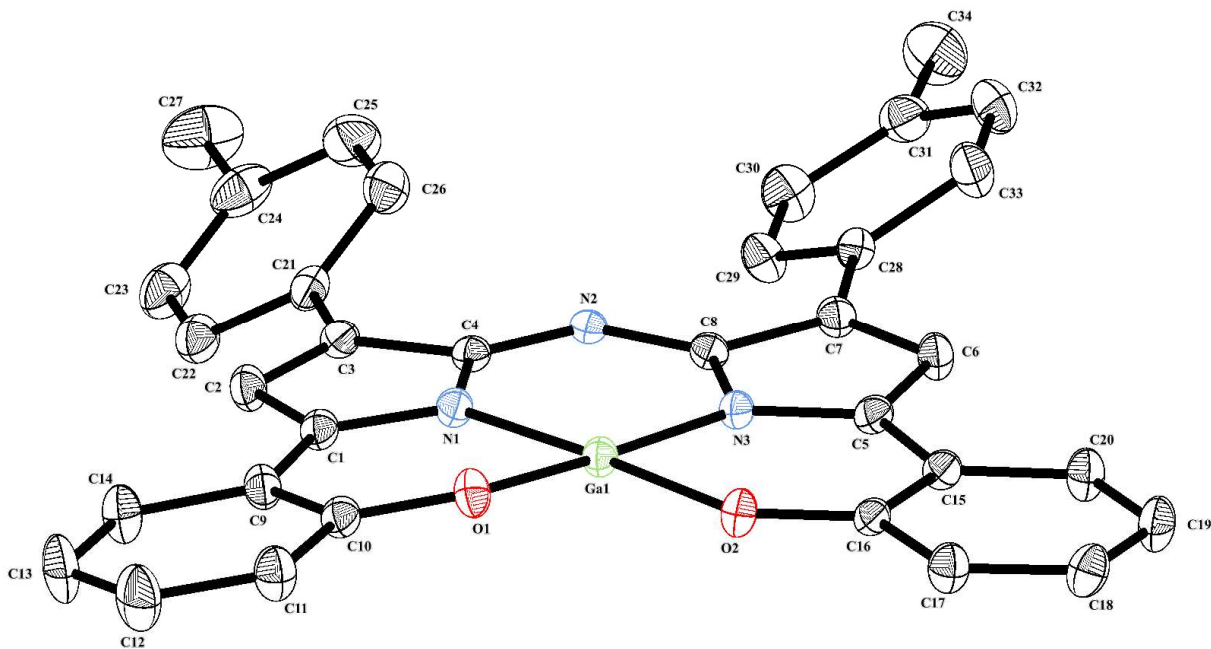

**Figure S20.** Single crystal X-ray diffraction structure of **3a**; ellipsoids are drawn at the 40% probability level. Axial bound pyridine ligands and hydrogen atoms omitted for clarity.

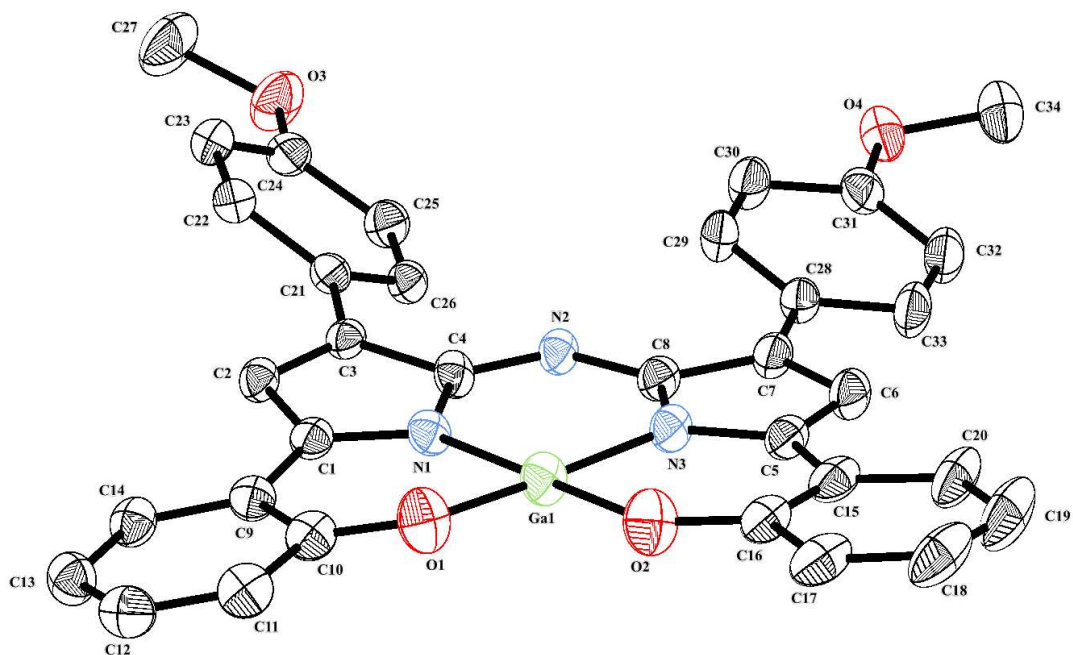

**Figure S21.** Single crystal X-ray diffraction structure of **3b**; ellipsoids are drawn at the 40% probability level. Axial bound pyridine ligands and hydrogen atoms omitted for clarity.

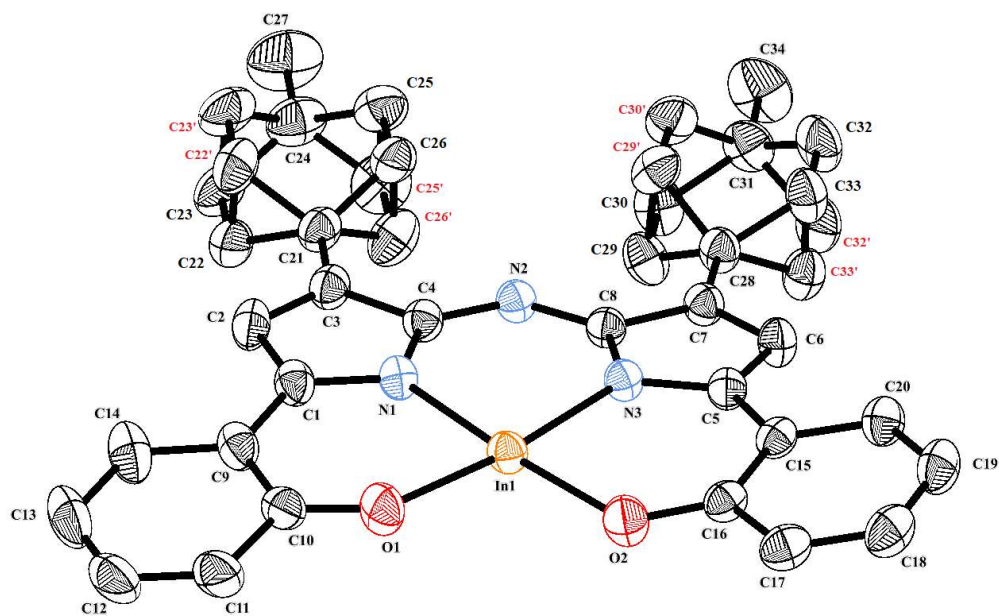

**Figure S22.** Single crystal X-ray diffraction structure of **4a**; ellipsoids are drawn at the 40% probability level. Axial bound pyridine ligands and hydrogen atoms omitted for clarity. Disordered carbon atoms on distal arenes are numbered in red.

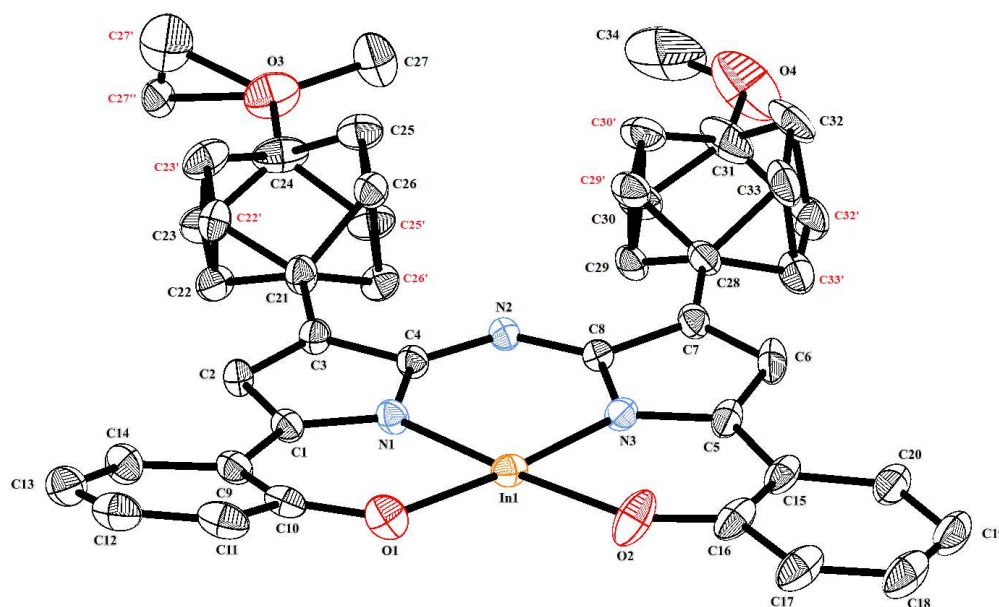

**Figure S23.** Single crystal X-ray diffraction structure of **4b**; ellipsoids are drawn at the 40% probability level. Axial bound pyridine ligands and hydrogen atoms omitted for clarity. Disordered carbon atoms on distal arenes are numbered in red.

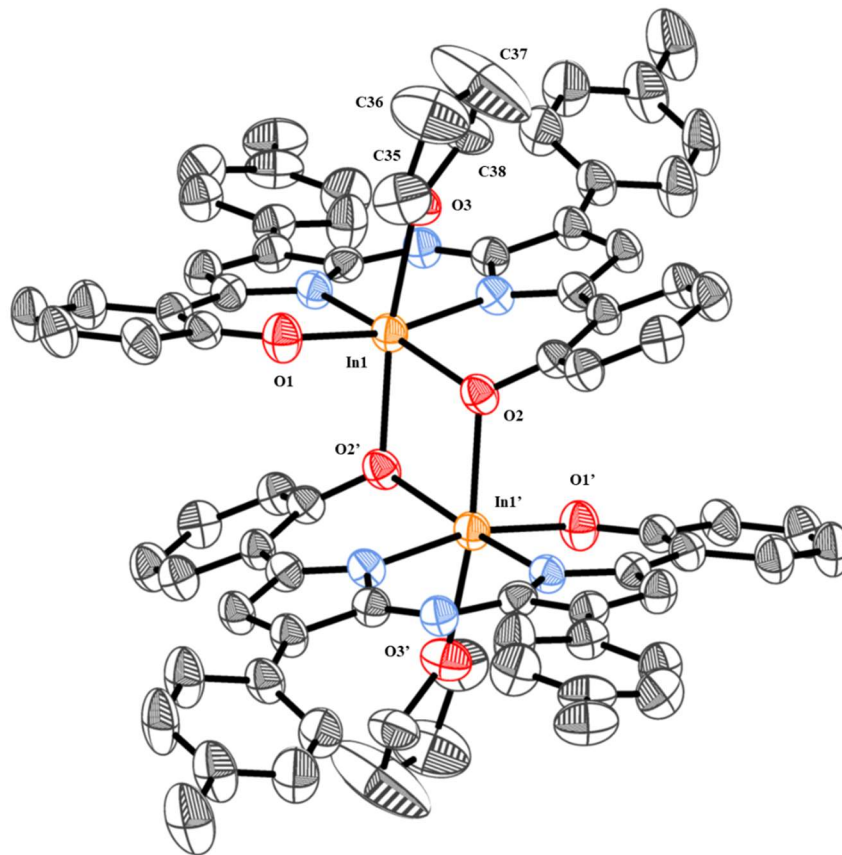

**Figure S24.** Single crystal X-ray diffraction structure of **4a'**; ellipsoids are drawn at the 40% probability level. Axial bound tetrahydrofuran ligands and hydrogen atoms omitted for clarity.



| Description                                                  | 1a (B-Me)                                                           | 2a (Al-Me)                                                          | 2b (Al-OMe)                                                         | 3a (Ga-Me)                                                          |
|--------------------------------------------------------------|---------------------------------------------------------------------|---------------------------------------------------------------------|---------------------------------------------------------------------|---------------------------------------------------------------------|
| Empirical Formula                                            | C <sub>34</sub> H <sub>24</sub> N <sub>3</sub> O <sub>2</sub> B     | C <sub>44</sub> H <sub>34</sub> N <sub>5</sub> O <sub>2</sub> Al    | C <sub>44</sub> H <sub>34</sub> N <sub>5</sub> O <sub>4</sub> Al    | C <sub>44</sub> H <sub>34</sub> N <sub>5</sub> O <sub>2</sub> Ga    |
| Formula Weight                                               | 517.37                                                              | 691.74                                                              | 723.74                                                              | 734.48                                                              |
| Wavelength (Å)                                               | 0.71073                                                             | 0.71073                                                             | 0.71073                                                             | 0.71073                                                             |
| Temperature (K)                                              | 293(2)                                                              | 150(2)                                                              | 293(2)                                                              | 150(2)                                                              |
| Crystal system                                               | Monoclinic                                                          | Triclinic                                                           | Triclinic                                                           | Triclinic                                                           |
| Space Group                                                  | <i>C</i> 2/ <i>c</i>                                                | <i>P</i> -1                                                         | <i>P</i> -1                                                         | <i>P</i> -1                                                         |
| <i>a</i> (Å)                                                 | 17.8773(13)                                                         | 9.5375(13)                                                          | 9.4422(3)                                                           | 9.5457(2)                                                           |
| <i>b</i> (Å)                                                 | 17.6426(12)                                                         | 13.824(2)                                                           | 13.9608(4)                                                          | 13.7422(3)                                                          |
| <i>c</i> (Å)                                                 | 16.5701(12)                                                         | 16.997(2)                                                           | 16.9362(5)                                                          | 17.0769(4)                                                          |
| $\alpha$ (°)                                                 | 90                                                                  | 71.126(2)                                                           | 105.914(2)                                                          | 71.253(2)                                                           |
| $\beta$ (°)                                                  | 91.625(5)                                                           | 89.184(2)                                                           | 100.571(2)                                                          | 89.086(2)                                                           |
| $\gamma$ (°)                                                 | 90                                                                  | 69.963(2)                                                           | 106.290(2)                                                          | 70.313(2)                                                           |
| <i>V</i> (Å <sup>3</sup> )                                   | 5224.1(6)                                                           | 1980.2(5)                                                           | 1977.11(11)                                                         | 1986.55(8)                                                          |
| <i>Z</i>                                                     | 8                                                                   | 2                                                                   | 2                                                                   | 2                                                                   |
| Density (g/cm <sup>3</sup> )                                 | 1.316                                                               | 1.160                                                               | 1.216                                                               | 1.228                                                               |
| $\mu$ (mm <sup>-1</sup> )                                    | 0.082                                                               | 0.093                                                               | 0.100                                                               | 0.734                                                               |
| <i>F</i> (000)                                               | 2160                                                                | 724                                                                 | 756                                                                 | 760                                                                 |
| $\Theta$ min., max. (°)                                      | 1.622, 27.908                                                       | 2.2865, 23.8961                                                     | 1.619, 27.407                                                       | 1.266, 27.515                                                       |
| Crystal size (mm)                                            | 0.117 x 0.145 x 0.227                                               | 0.09 x 0.13 x 0.22                                                  | 0.12 x 0.13 x 0.28                                                  | 0.08 x 0.08 x 0.30                                                  |
| Index ranges                                                 | -23 < <i>h</i> < 23;<br>-22 < <i>k</i> < 23;<br>-21 < <i>l</i> < 21 | -12 < <i>h</i> < 12;<br>-17 < <i>k</i> < 17;<br>-22 < <i>l</i> < 22 | -12 < <i>h</i> < 12;<br>-18 < <i>k</i> < 18;<br>-21 < <i>l</i> < 21 | -12 < <i>h</i> < 12;<br>-17 < <i>k</i> < 17;<br>-22 < <i>l</i> < 22 |
| Reflections collected                                        | 35641                                                               | 19176                                                               | 27131                                                               | 26145                                                               |
| <i>R</i> <sub>int</sub> (%)                                  | 0.0317                                                              | 0.0432                                                              | 0.0420                                                              | 0.0382                                                              |
| Data/restraints/parameters                                   | 6163/0/364                                                          | 9025/0/471                                                          | 8924/0/489                                                          | 9069/0/471                                                          |
| Goodness-of-fit on <i>F</i> <sup>2</sup>                     | 1.036                                                               | 0.999                                                               | 1.024                                                               | 1.053                                                               |
| <i>R</i> <sub>1</sub> [ <i>I</i> > 2 $\sigma$ ( <i>I</i> )]  | 0.0441                                                              | 0.0476                                                              | 0.0485                                                              | 0.0378                                                              |
| <i>wR</i> <sub>2</sub> [ <i>I</i> > 2 $\sigma$ ( <i>I</i> )] | 0.1226                                                              | 0.1245                                                              | 0.1480                                                              | 0.0930                                                              |
| Largest diff. peak/hole (e Å <sup>-3</sup> )                 | 0.285 and -0.225                                                    | 0.263 and -0.255                                                    | 0.211 and -0.328                                                    | 0.470 and -0.572                                                    |
| Observed data [ <i>I</i> > 2.0 $\sigma$ ( <i>I</i> )]        | 4163                                                                | 5574                                                                | 5045                                                                | 7000                                                                |

**Table S3.** Crystallographic data and refinement parameters for **1a**, **2a-b** and **3a-b**.

| Description                                  | 3b (Ga-OMe)                                                      | 4a (In-Me)                                                       | 4b (In-OMe)                                                      | 4a' (In-Me-Dimer)                                                             |
|----------------------------------------------|------------------------------------------------------------------|------------------------------------------------------------------|------------------------------------------------------------------|-------------------------------------------------------------------------------|
| Empirical Formula                            | C <sub>44</sub> H <sub>34</sub> N <sub>5</sub> O <sub>4</sub> Ga | C <sub>44</sub> H <sub>34</sub> N <sub>5</sub> O <sub>2</sub> In | C <sub>44</sub> H <sub>34</sub> N <sub>5</sub> O <sub>4</sub> In | C <sub>76</sub> H <sub>64</sub> N <sub>6</sub> O <sub>6</sub> In <sub>2</sub> |
| Formula Weight                               | 766.48                                                           | 779.58                                                           | 811.58                                                           | 1386.97                                                                       |
| Wavelength (Å)                               | 0.71073                                                          | 0.71073                                                          | 0.71073                                                          | 0.71073                                                                       |
| Temperature (K)                              | 215(2)                                                           | 293(2)                                                           | 150(2)                                                           | 293(2)                                                                        |
| Crystal system                               | Orthorhombic                                                     | Triclinic                                                        | Triclinic                                                        | Triclinic                                                                     |
| Space Group                                  | <i>Fdd2</i>                                                      | <i>P</i> -1                                                      | <i>P</i> -1                                                      | <i>P</i> -1                                                                   |
| a (Å)                                        | 20.9391(10)                                                      | 9.7402(16)                                                       | 9.7573(4)                                                        | 8.7943(8)                                                                     |
| b (Å)                                        | 25.3066(13)                                                      | 9.9876(16)                                                       | 9.8180(4)                                                        | 11.7579(10)                                                                   |
| c (Å)                                        | 29.4364(15)                                                      | 19.774(3)                                                        | 19.3367(9)                                                       | 14.8580(13)                                                                   |
| α (°)                                        | 90                                                               | 104.509(8)                                                       | 103.7920(10)                                                     | 98.225(6)                                                                     |
| β (°)                                        | 90                                                               | 100.981(8)                                                       | 98.2980(10)                                                      | 90.613(6)                                                                     |
| γ (°)                                        | 90                                                               | 96.196(9)                                                        | 95.5750(10)                                                      | 90.271(6)                                                                     |
| V (Å <sup>3</sup> )                          | 15598.3(14)                                                      | 1803.5(5)                                                        | 1763.40(13)                                                      | 1520.4(2)                                                                     |
| Z                                            | 16                                                               | 2                                                                | 2                                                                | 1                                                                             |
| Density (g/cm <sup>3</sup> )                 | 1.306                                                            | 1.436                                                            | 1.528                                                            | 1.515                                                                         |
| μ (mm <sup>-1</sup> )                        | 0.754                                                            | 0.701                                                            | 0.724                                                            | 0.821                                                                         |
| F (000)                                      | 6336                                                             | 796                                                              | 828                                                              | 708                                                                           |
| Θ min., max. (°)                             | 2.123, 27.526                                                    | 2.111, 27.749                                                    | 2.129, 27.489                                                    | 1.750, 28.332                                                                 |
| Crystal size (mm)                            | 0.26 x 0.26 x 0.28                                               | 0.08 x 0.24 x 0.55                                               | 0.07 x 0.19 x 0.24                                               | 0.038 x 0.082 x 0.085                                                         |
| Index ranges                                 | -27 < h < 27;<br>-32 < k < 32;<br>-38 < l < 38                   | -12 < h < 12;<br>-13 < k < 12;<br>-25 < l < 25                   | -14 < h < 14;<br>-15 < k < 15;<br>-29 < l < 29                   | -11 < h < 11;<br>-15 < k < 15;<br>-19 < l < 19                                |
| Reflections collected                        | 36867                                                            | 23828                                                            | 17040                                                            | 20853                                                                         |
| R <sub>int</sub> (%)                         | 0.0494                                                           | 0.0247                                                           | 0.0266                                                           | 0.0781                                                                        |
| Data/restraints/parameters                   | 8973/1/490                                                       | 8295/0/544                                                       | 8022/1/631                                                       | 7503/0/409                                                                    |
| Goodness-of-fit on F <sup>2</sup>            | 1.020                                                            | 1.038                                                            | 1.032                                                            | 0.934                                                                         |
| R <sub>1</sub> [I > 2σ(I)]                   | 0.0359                                                           | 0.0268                                                           | 0.0295                                                           | 0.0529                                                                        |
| wR <sub>2</sub> [I > 2σ(I)]                  | 0.0816                                                           | 0.0721                                                           | 0.0732                                                           | 0.1379                                                                        |
| Largest diff. peak/hole (e Å <sup>-3</sup> ) | 0.215 and -0.304                                                 | 0.520 and -0.297                                                 | 0.700 and -0.605                                                 | 0.763 and -0.865                                                              |
| Observed data [I > 2.0σ(I)]                  | 7160                                                             | 7473                                                             | 7290                                                             | 4065                                                                          |

**Table S4.** Crystallographic data and refinement parameters for **3b**, **4a-b** and **4a'**.

| Compound          | Planarity of M Center (°) |            |            |            |                   |
|-------------------|---------------------------|------------|------------|------------|-------------------|
|                   | N1-M-N3                   | N1-M-O1    | O1-M-O2    | N3-M-O2    | Planarity vs 360° |
| 1a (B-Me)         | 103.41(11)                | 106.91(11) | 107.20(11) | 106.18(11) | 63.70             |
| 2a (Al-Me)        | 88.44(6)                  | 91.70(6)   | 89.23(6)   | 90.74(6)   | 0.13              |
| 2b (Al-OMe)       | 88.72(7)                  | 91.16(7)   | 89.45(7)   | 90.66(7)   | 0.02              |
| 3a (Ga-Me)        | 88.97(6)                  | 91.89(6)   | 88.10(6)   | 91.18(6)   | 0.16              |
| 3b (Ga-OMe)       | 88.71(11)                 | 92.01(12)  | 86.65(12)  | 92.59(12)  | -0.04             |
| 4a (In-Me)        | 85.47(6)                  | 87.32(6)   | 99.75(6)   | 87.53(6)   | 0.09              |
| 4b (In-OMe)       | 85.84(6)                  | 86.75(6)   | 99.81(7)   | 87.60(7)   | 0.03              |
| 4a' (In-Me-Dimer) | 86.64(3)                  | 87.73(5)   | 102.66(4)  | 85.20(1)   | 2.24              |

**Table S5.** Crystallographic structure bond angles of metal center in **1a**, **2a-b**, **3a-b**, **4a-b**, and **4a'**.

| Compound          | Axial Pyridine Ligands (°) | Proximal Dihedral Angles (°) |               | Phenolic Puckering (°) |
|-------------------|----------------------------|------------------------------|---------------|------------------------|
|                   | N4-M-N5                    | C2-C1-C9-C14                 | C6-C5-C15-C20 | O1-N1-N3-O2            |
| 1a (B-Me)         | --                         | -22.23(9)                    | -24.41(4)     | -66.02(5)              |
| 2a (Al-Me)        | 176.55(7)                  | 4.44(5)                      | -3.62(1)      | 3.31(8)                |
| 2b (Al-OMe)       | 179.07(7)                  | 5.20(1)                      | -5.11(7)      | -0.23(4)               |
| 3a (Ga-Me)        | 175.39(6)                  | 4.35(5)                      | -3.32(8)      | 3.84(1)                |
| 3b (Ga-OMe)       | 175.3(3)                   | 12.18(2)                     | 0.51(1)       | 1.31(8)                |
| 4a (In-Me)        | 171.50(9)                  | 1.34(1)                      | 12.69(9)      | 2.89(6)                |
| 4b (In-OMe)       | 170.26(8)                  | 2.17(4)                      | -8.81(5)      | 0.88(3)                |
| 4a' (In-Me-Dimer) | 163.81(12)*                | -5.23(9)                     | 6.05(6)       | 17.44(3)               |

\*Axial THF ligands measured through O3(THF)-In1-O2'.

**Table S6.** Crystallographic structure axial ligand angles and dihedral angles of phenolic puckering in **1a**, **2a-b**, **3a-b**, **4a-b**, and **4a'**.

## References

1. G. Zhang, C. B. Musgrave, *J. Phys. Chem. A*, 2007, **111**, 1554-1561.
2. P. Ziegler, *Bruker TopSpin 3.2 User Manual*, 2013, 112-131.

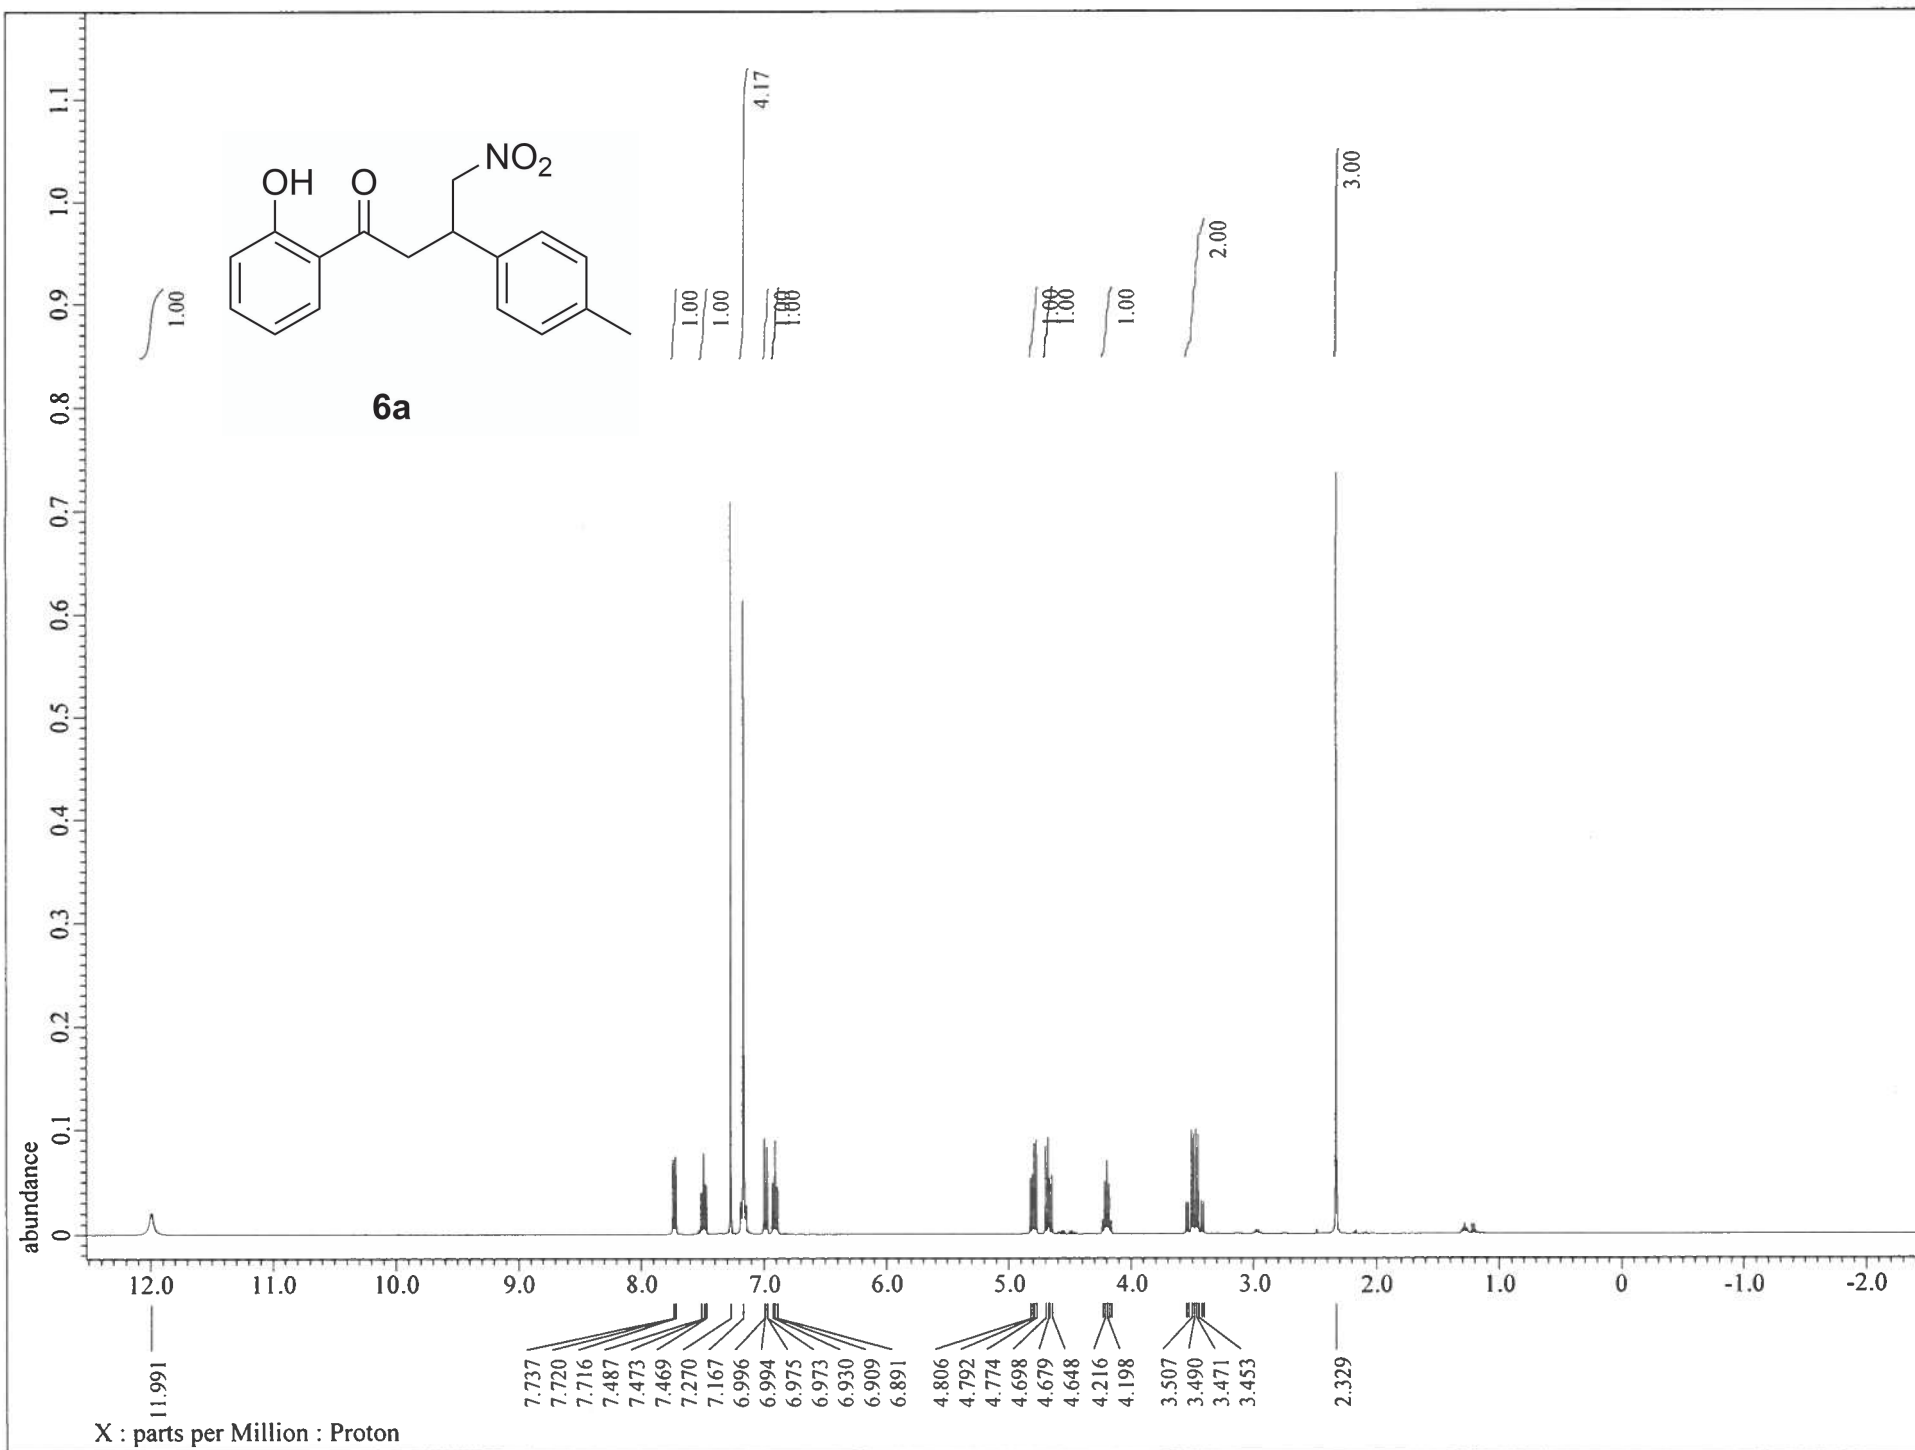

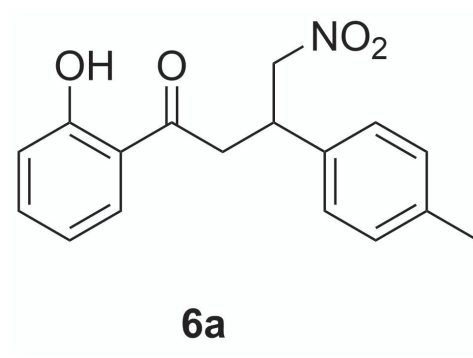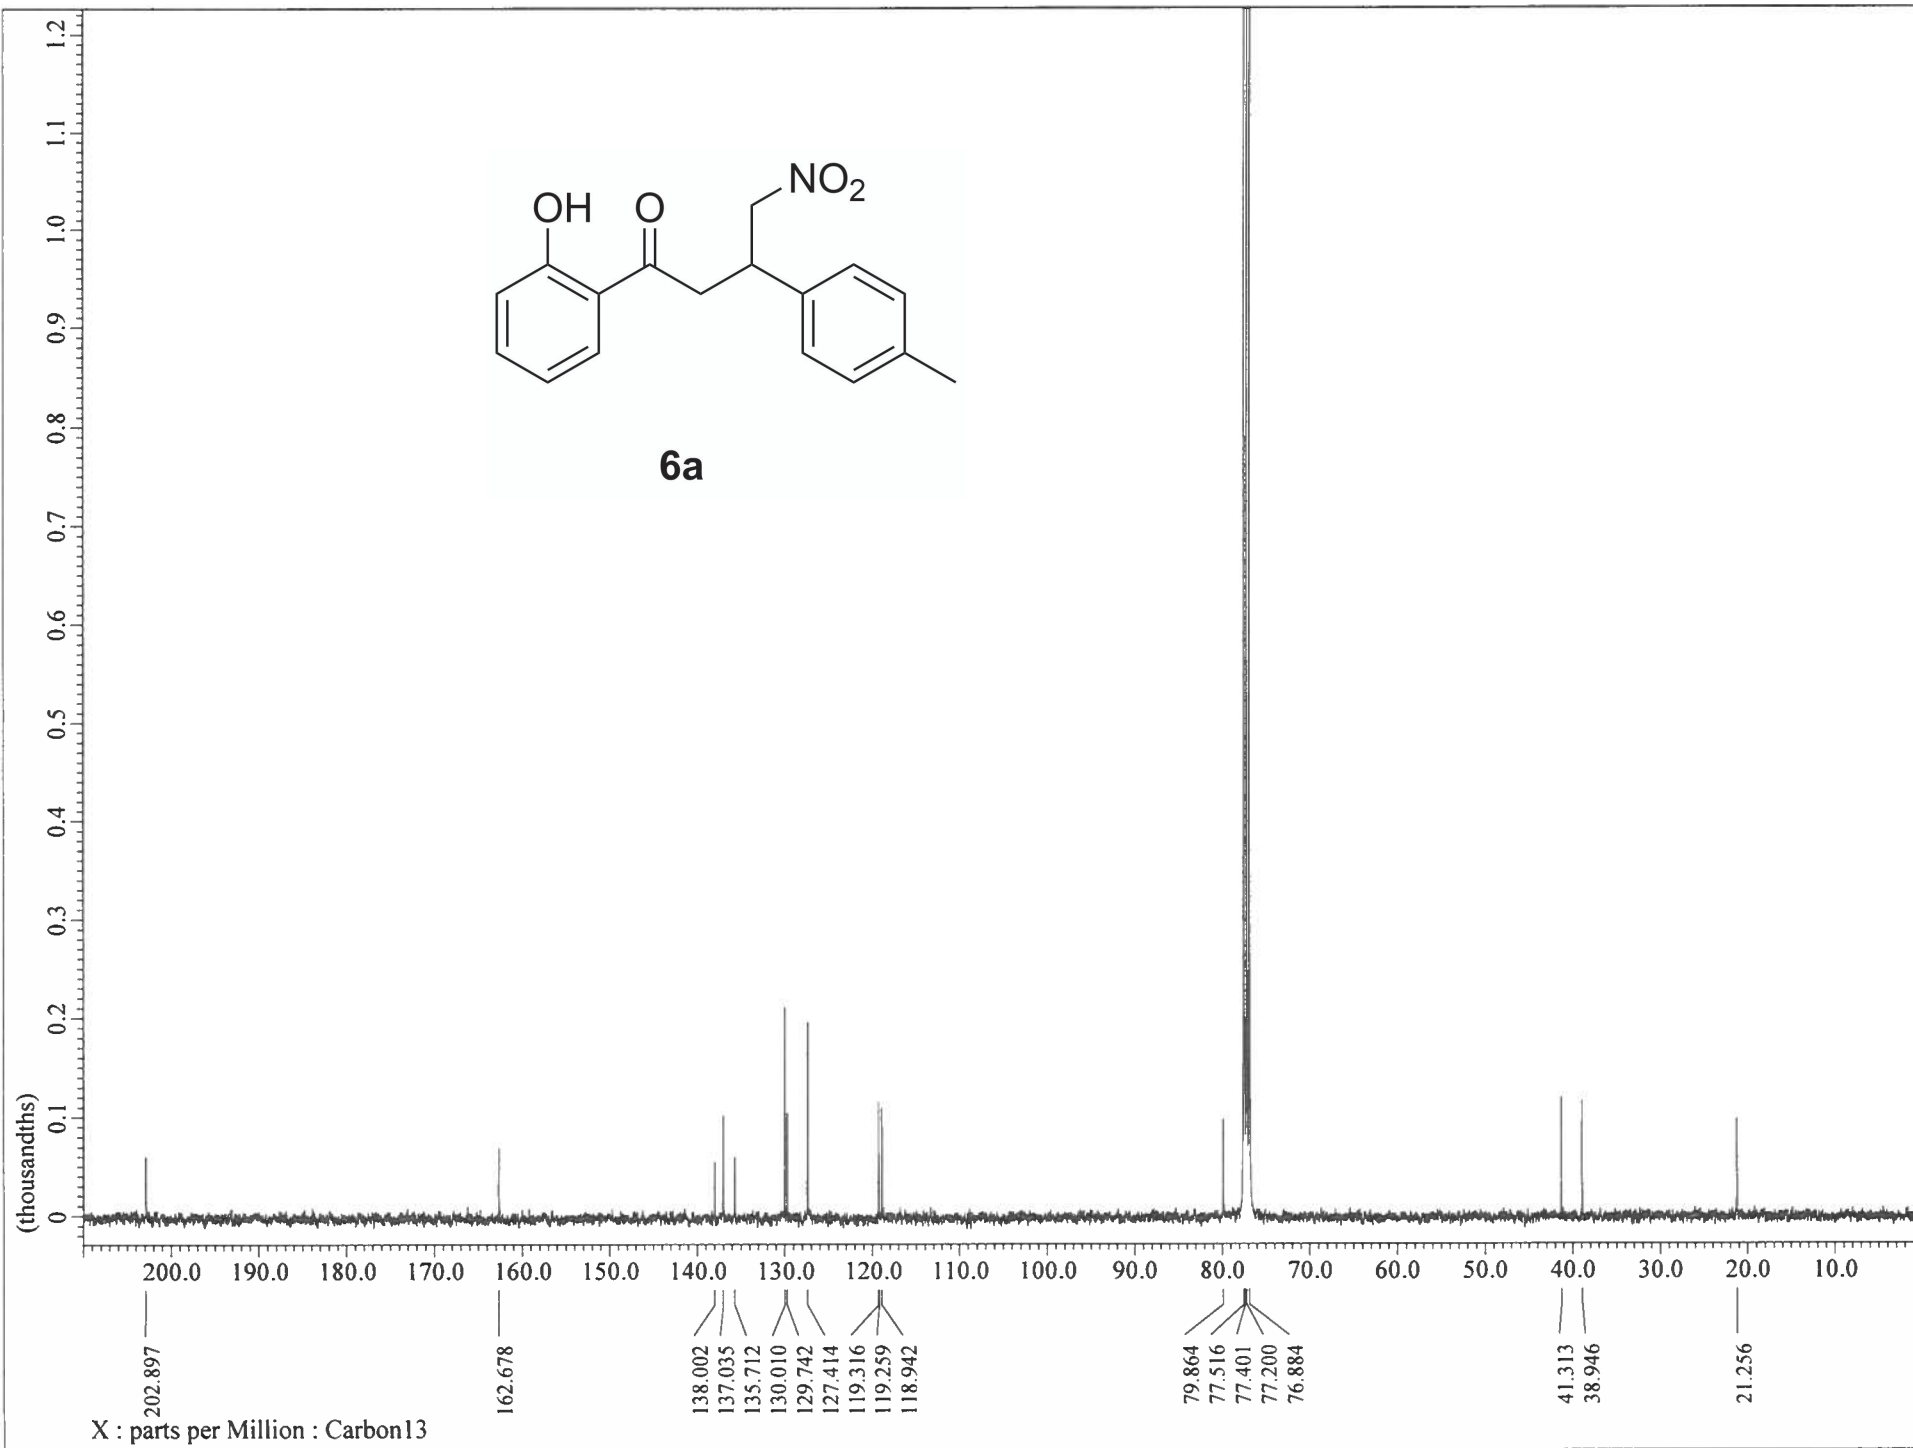

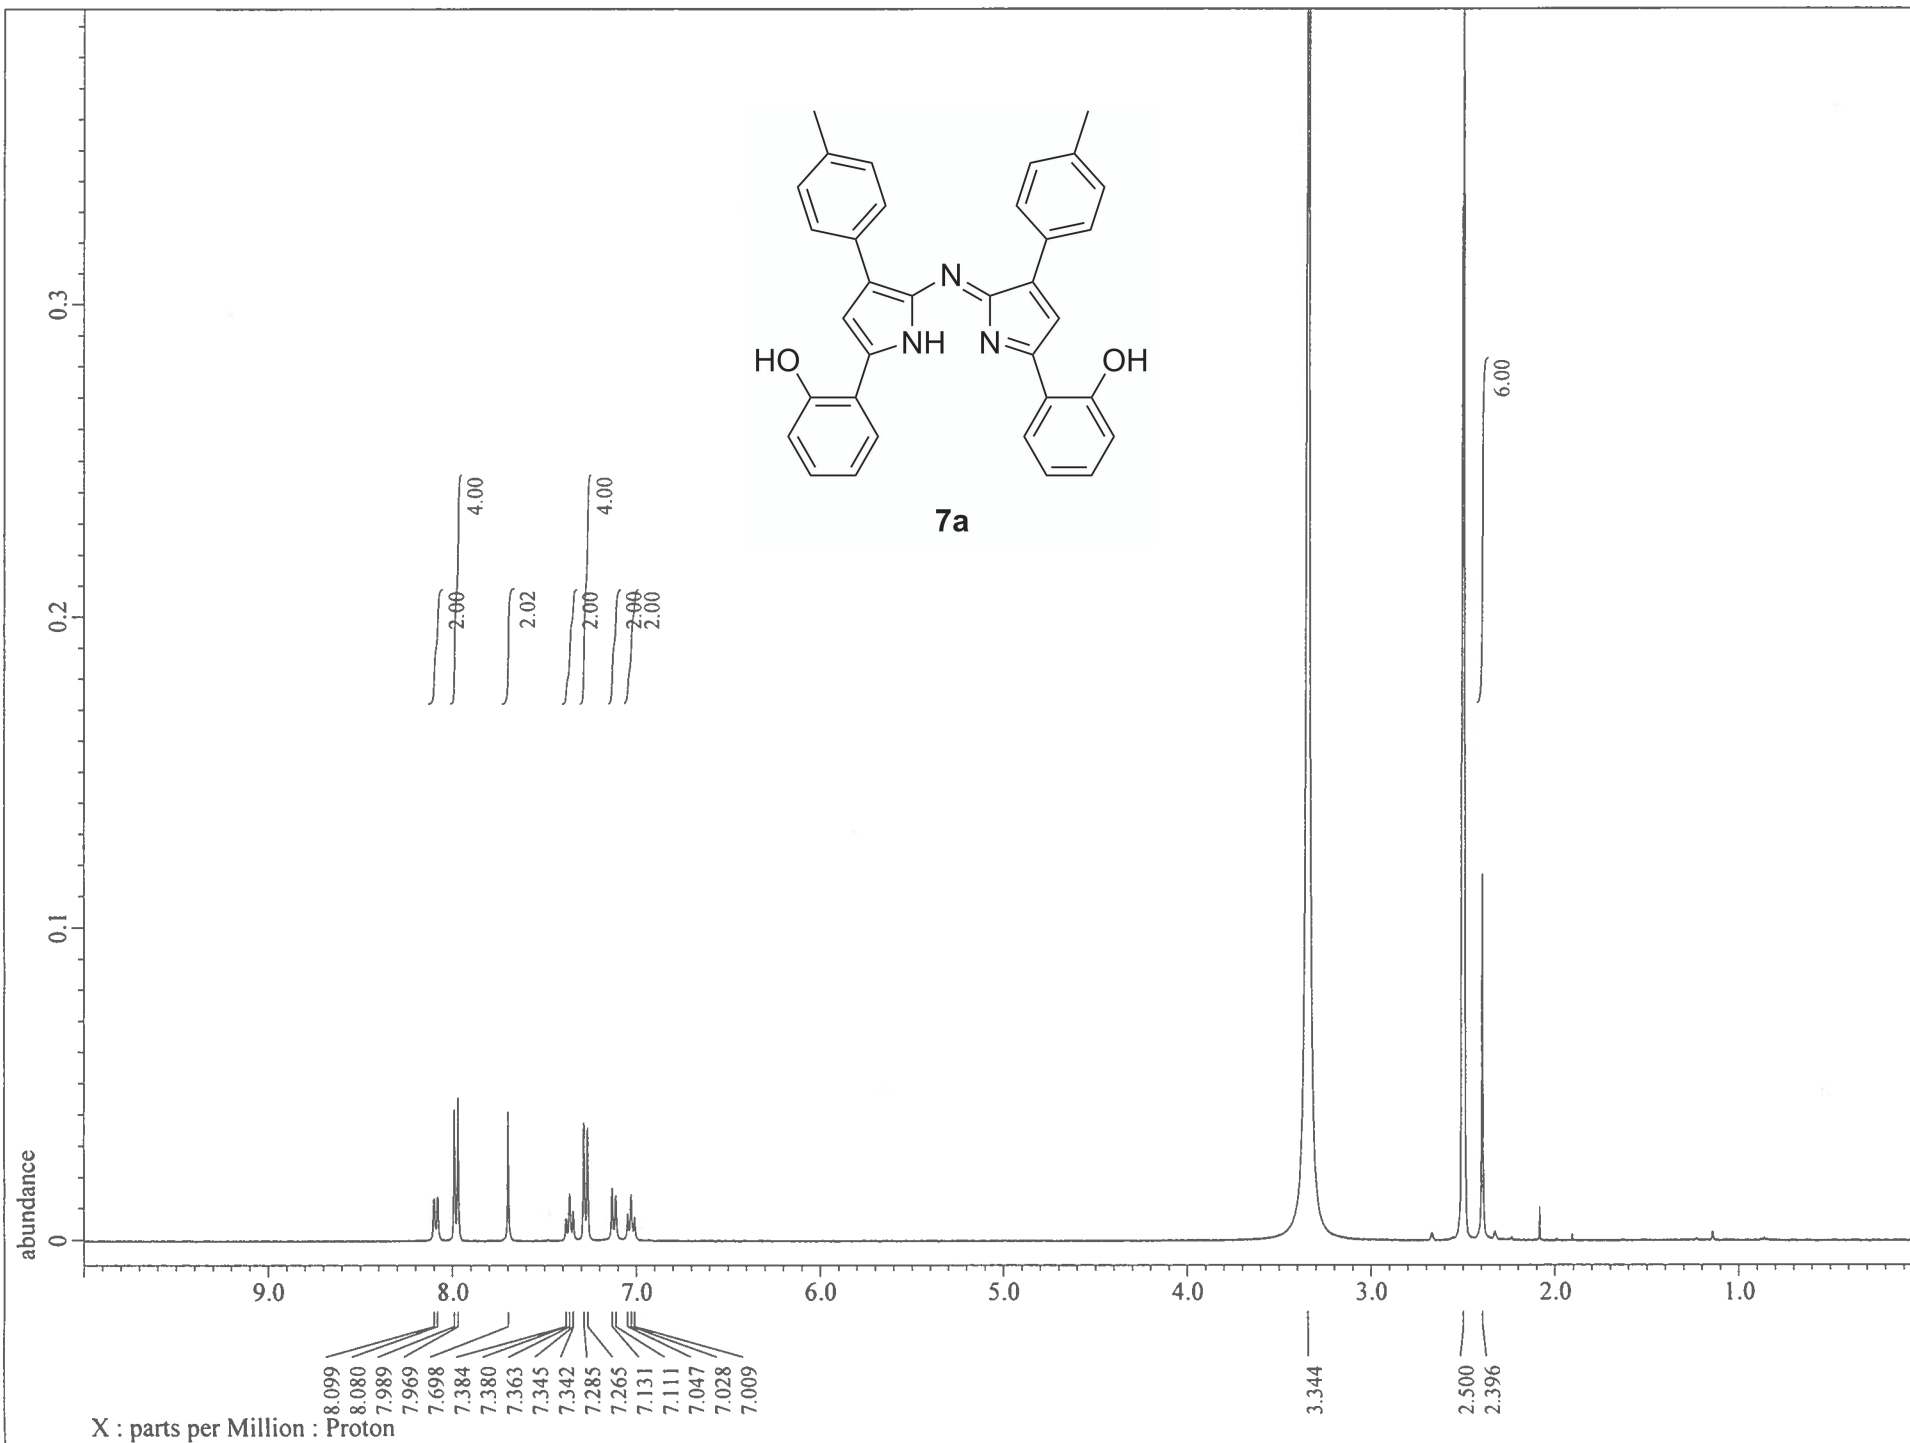

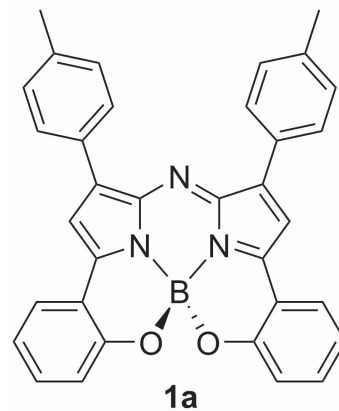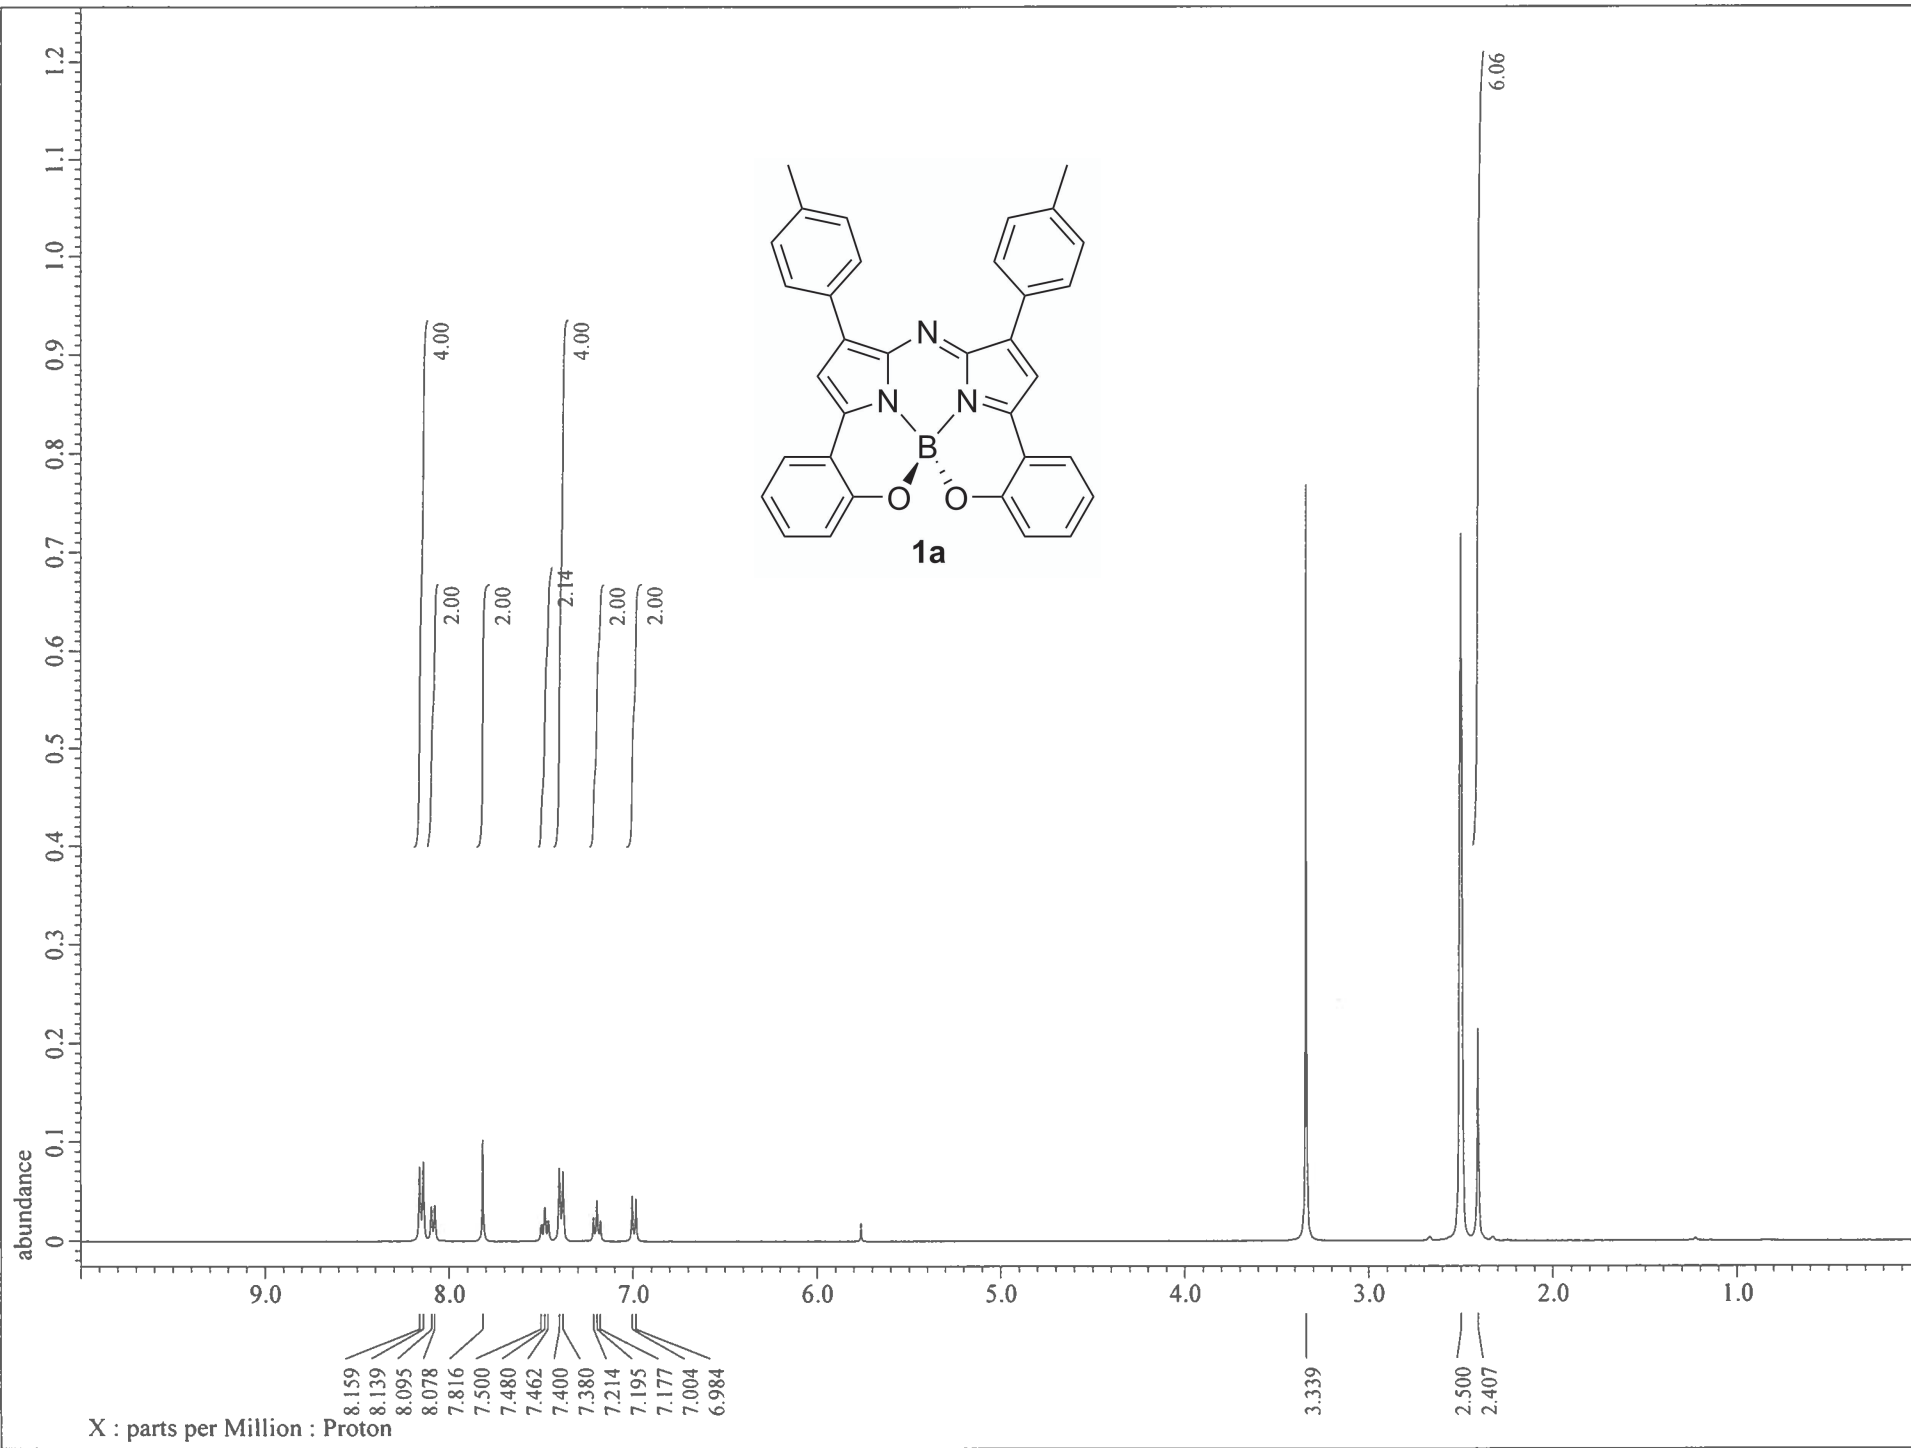

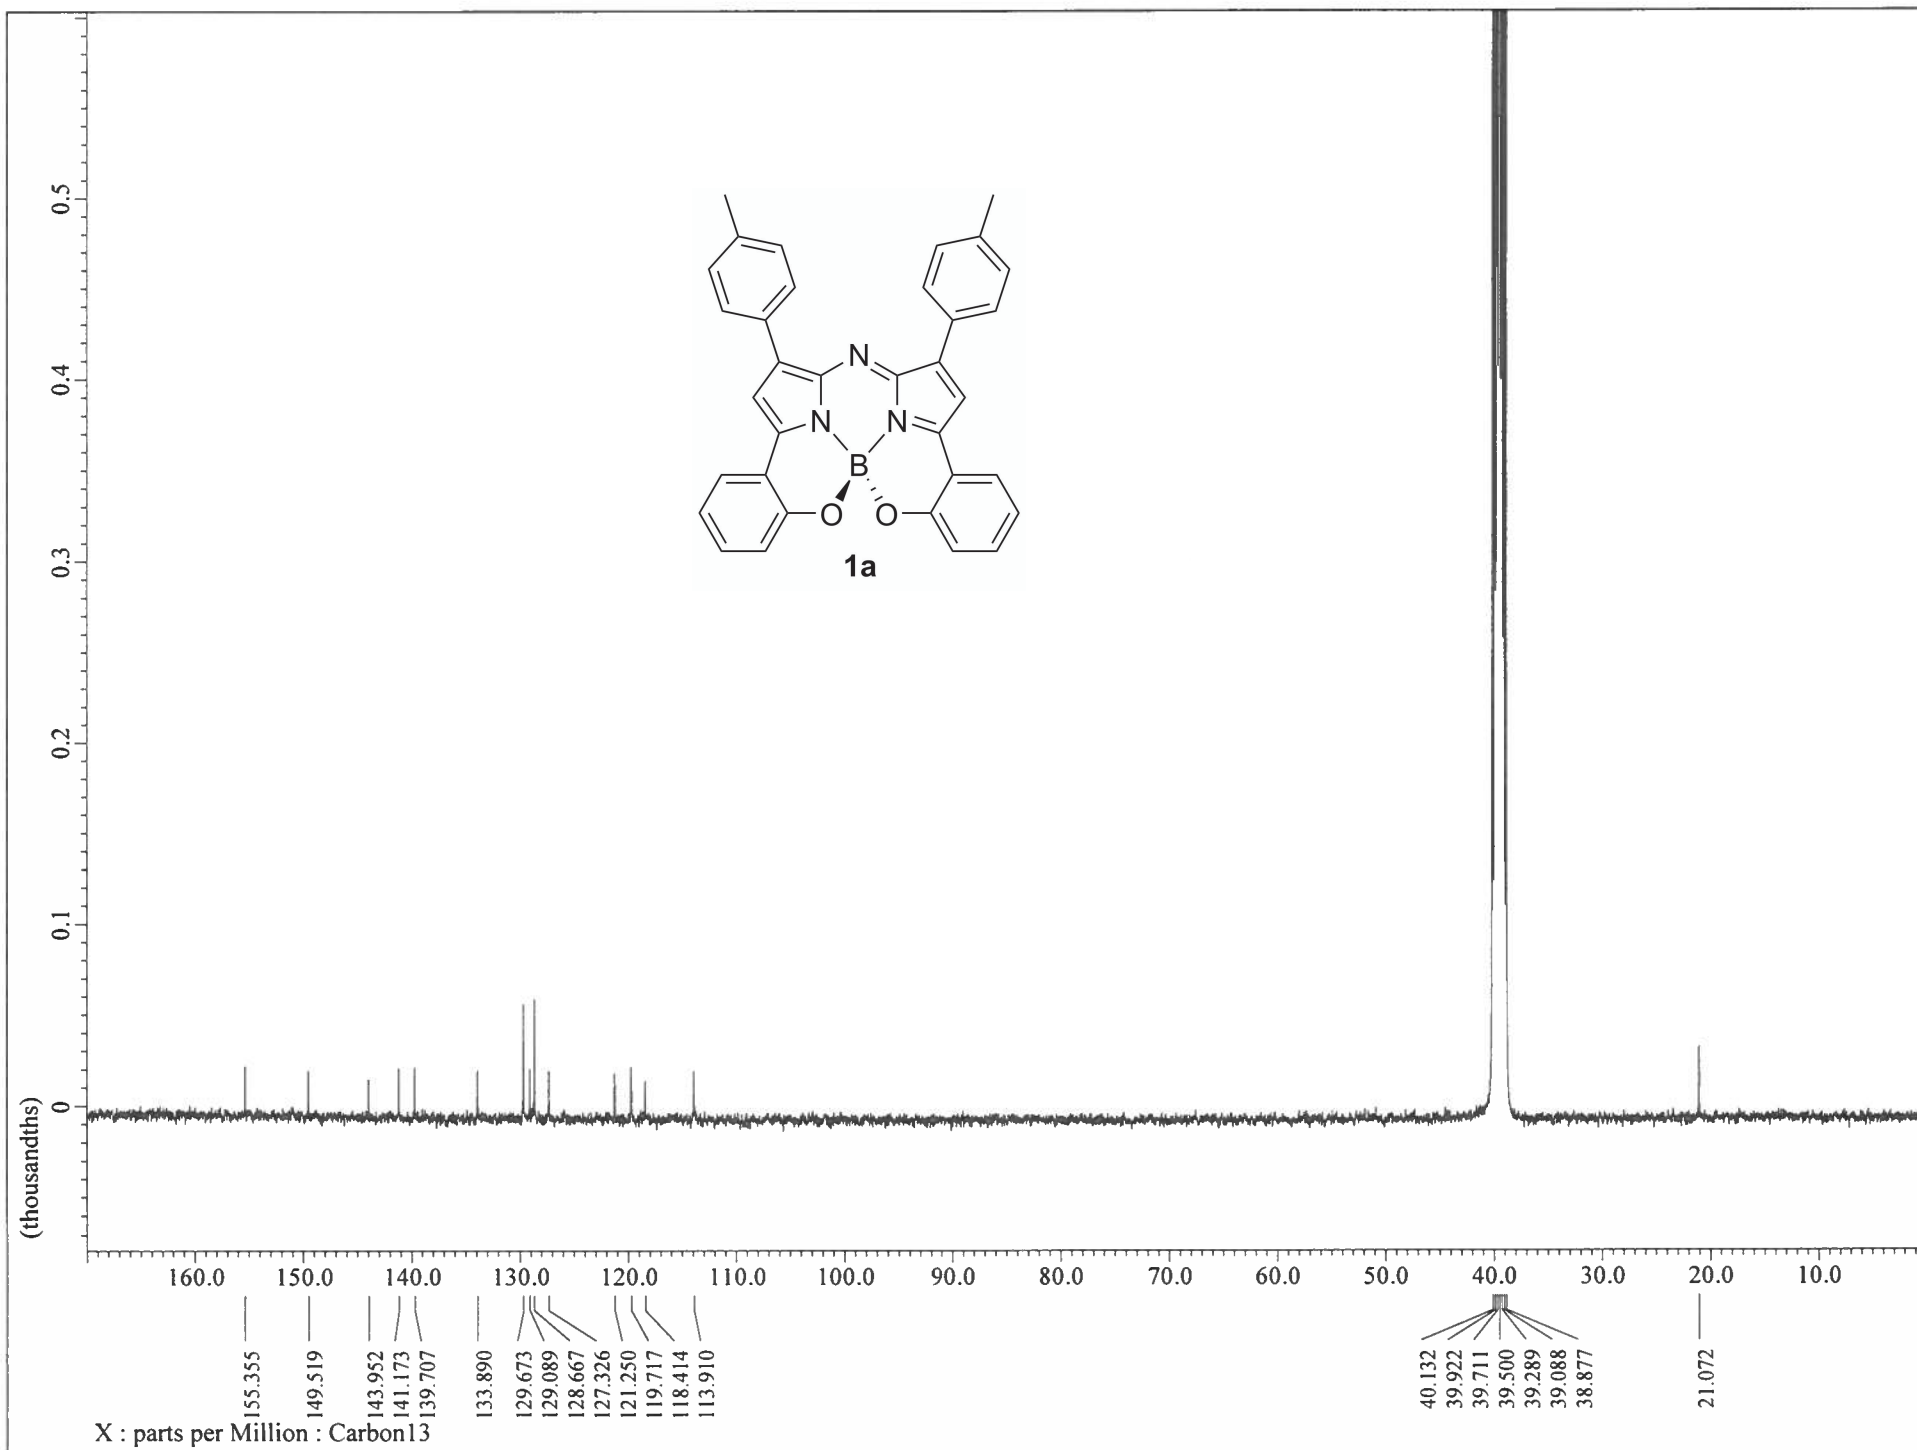



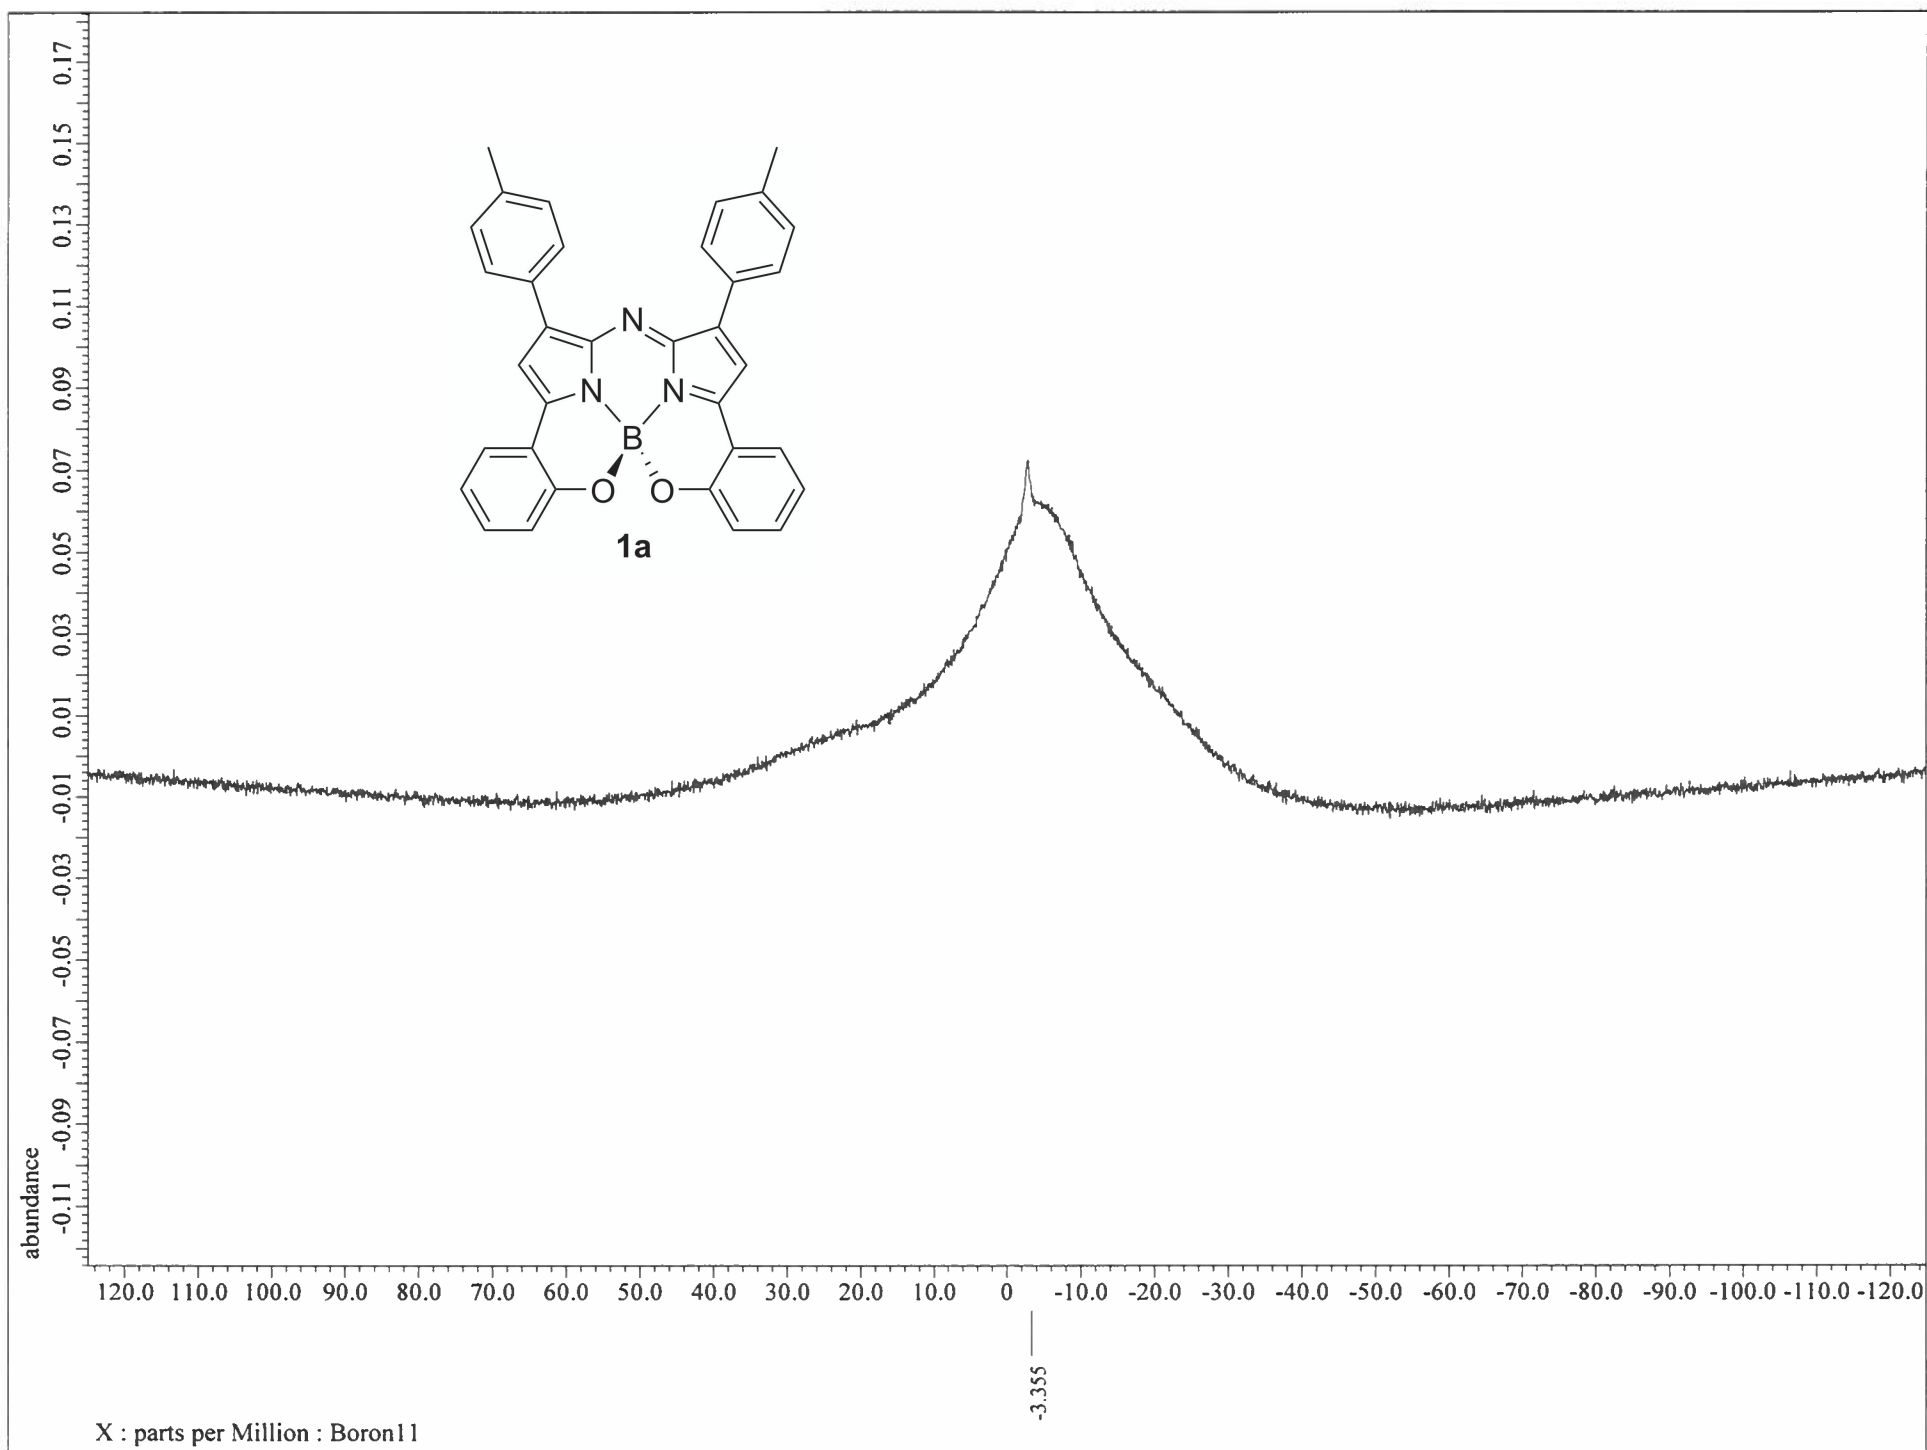

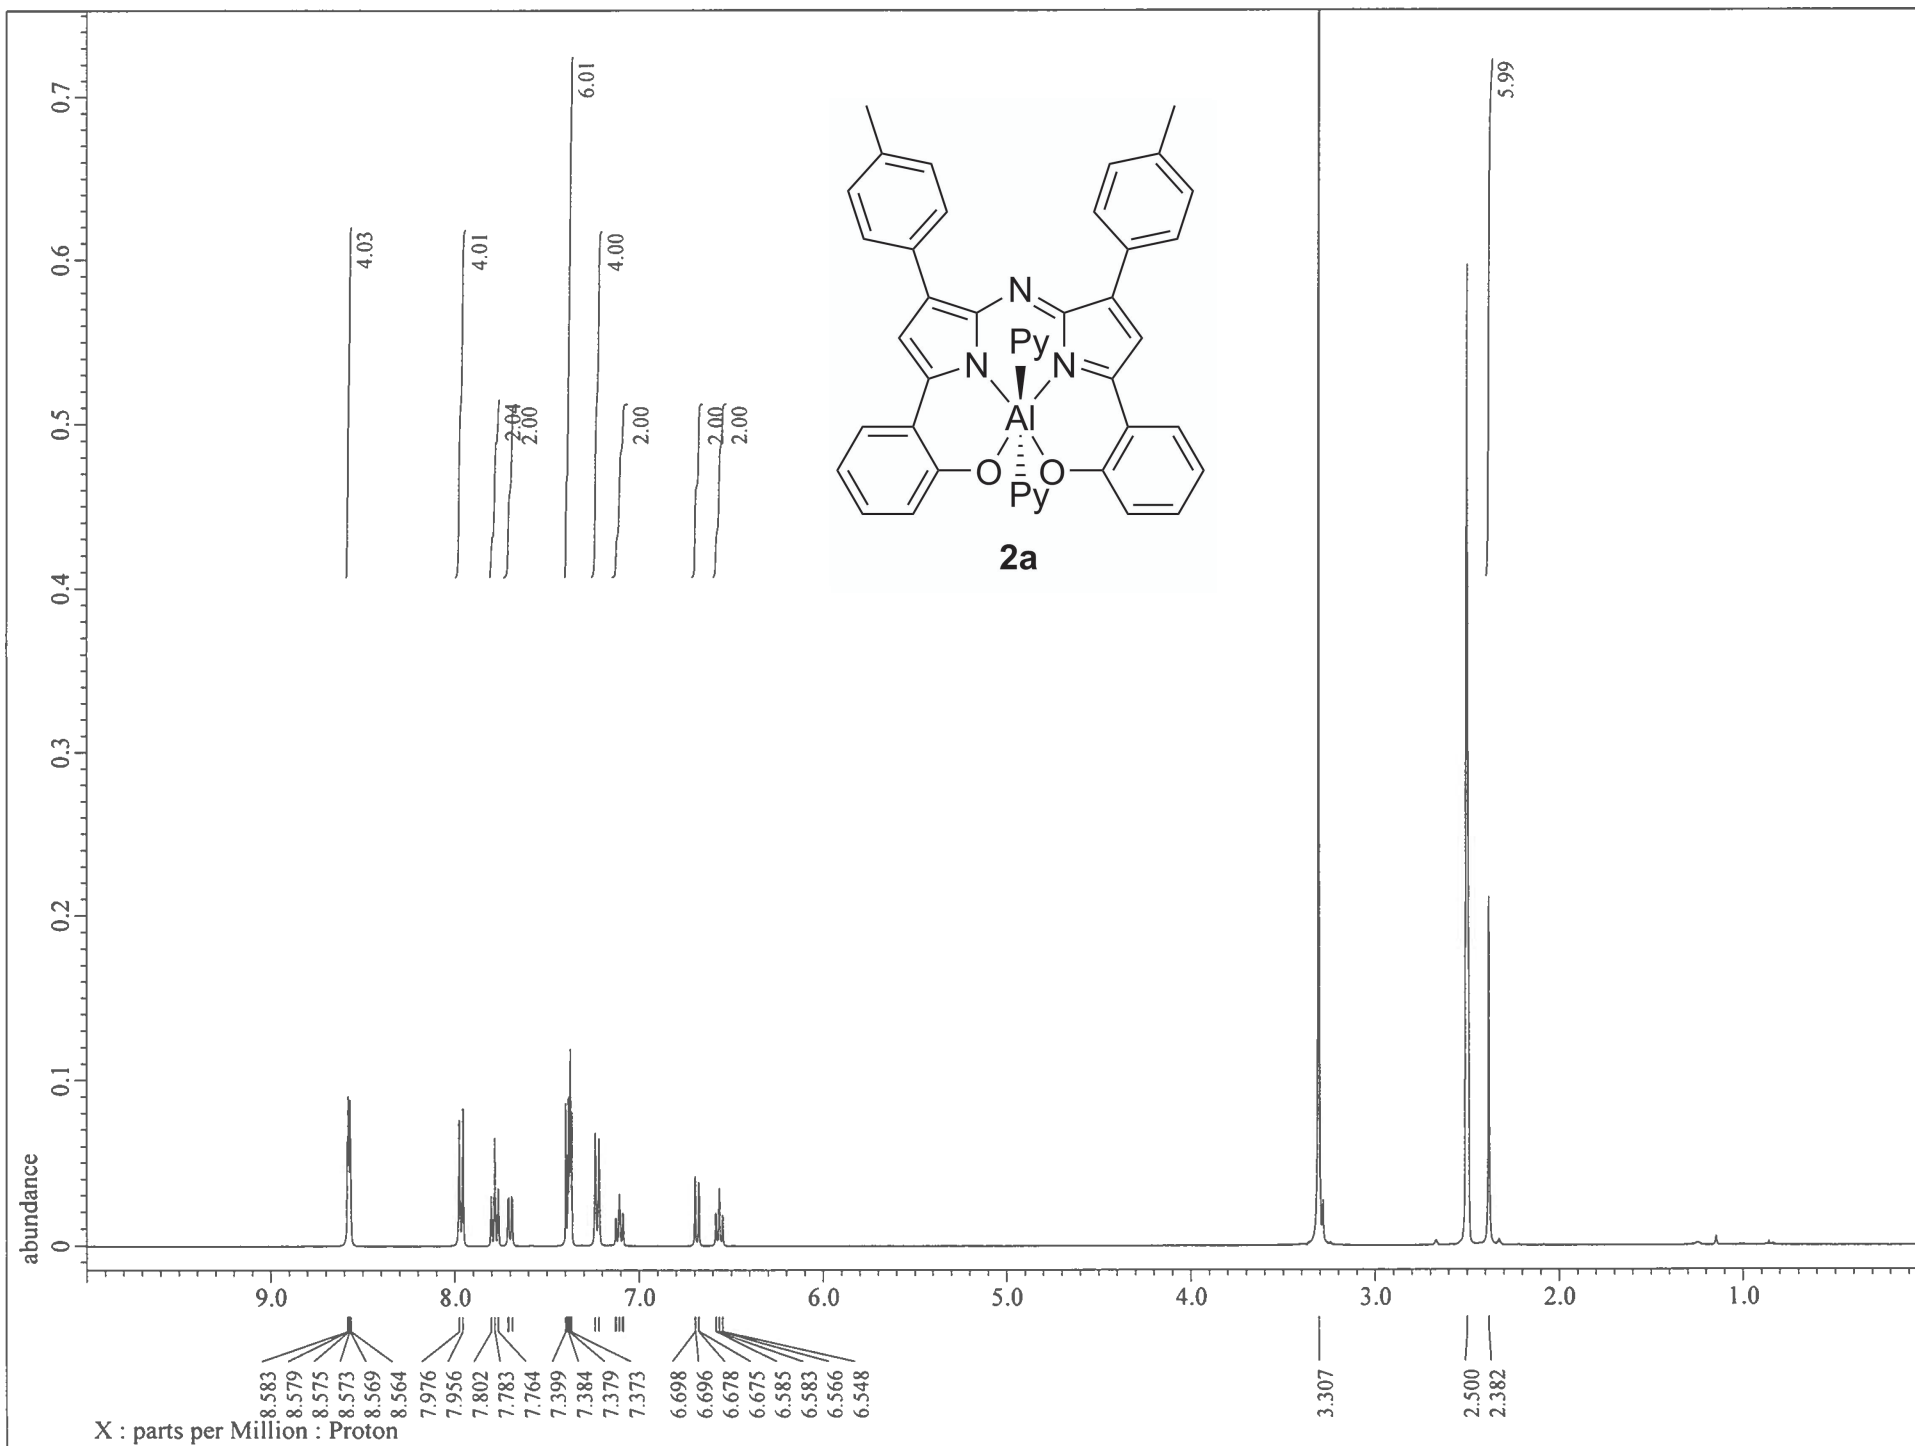

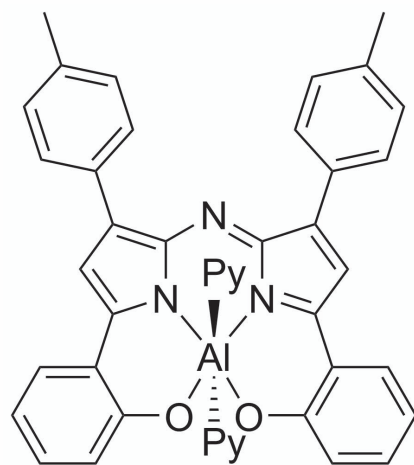

2a

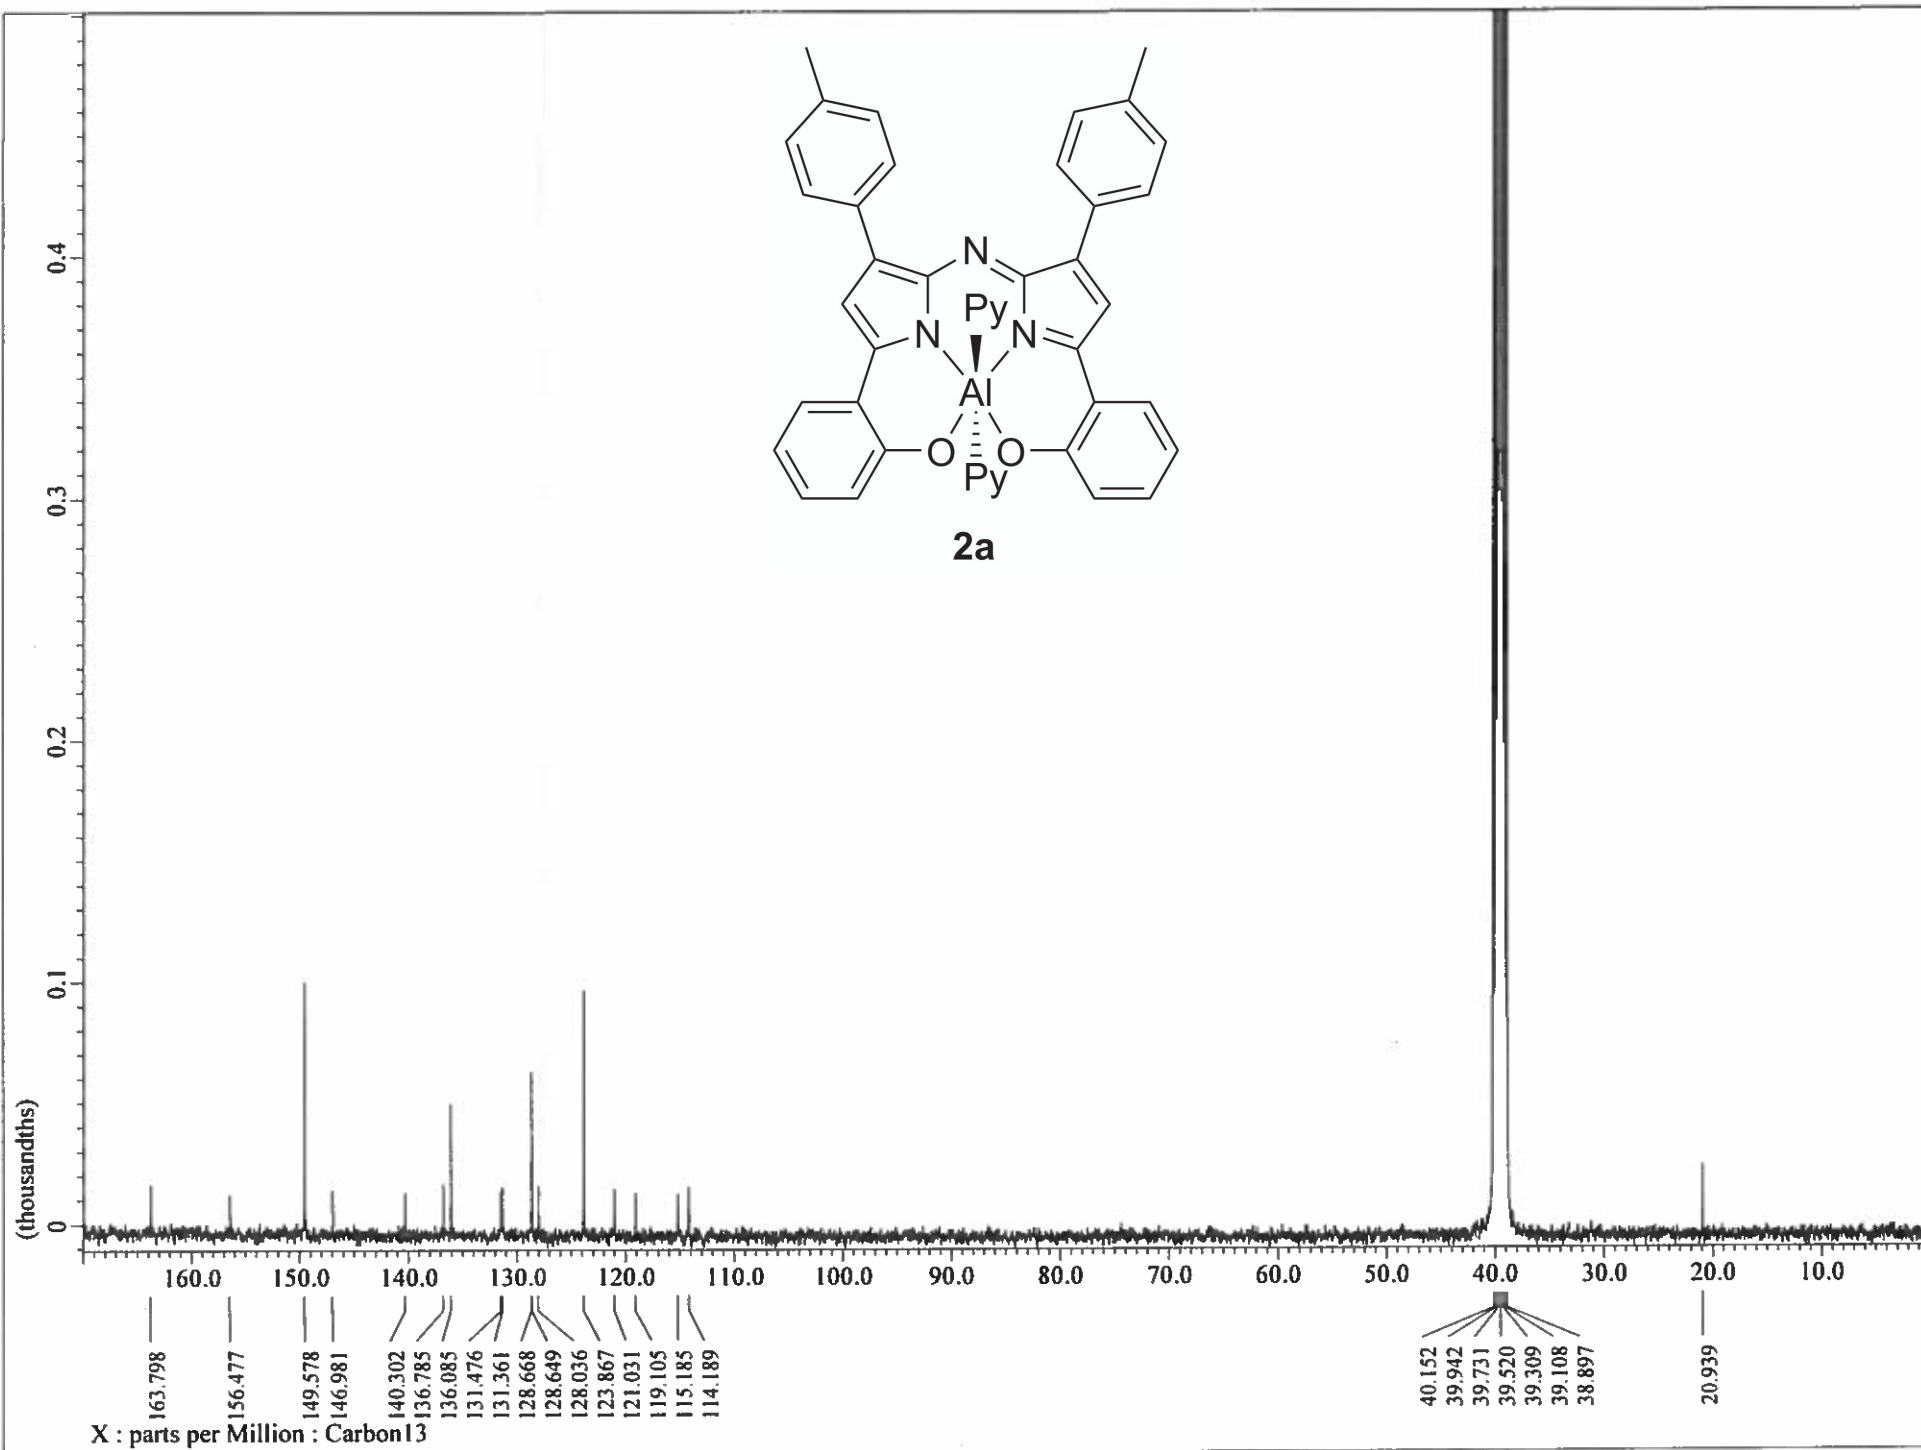

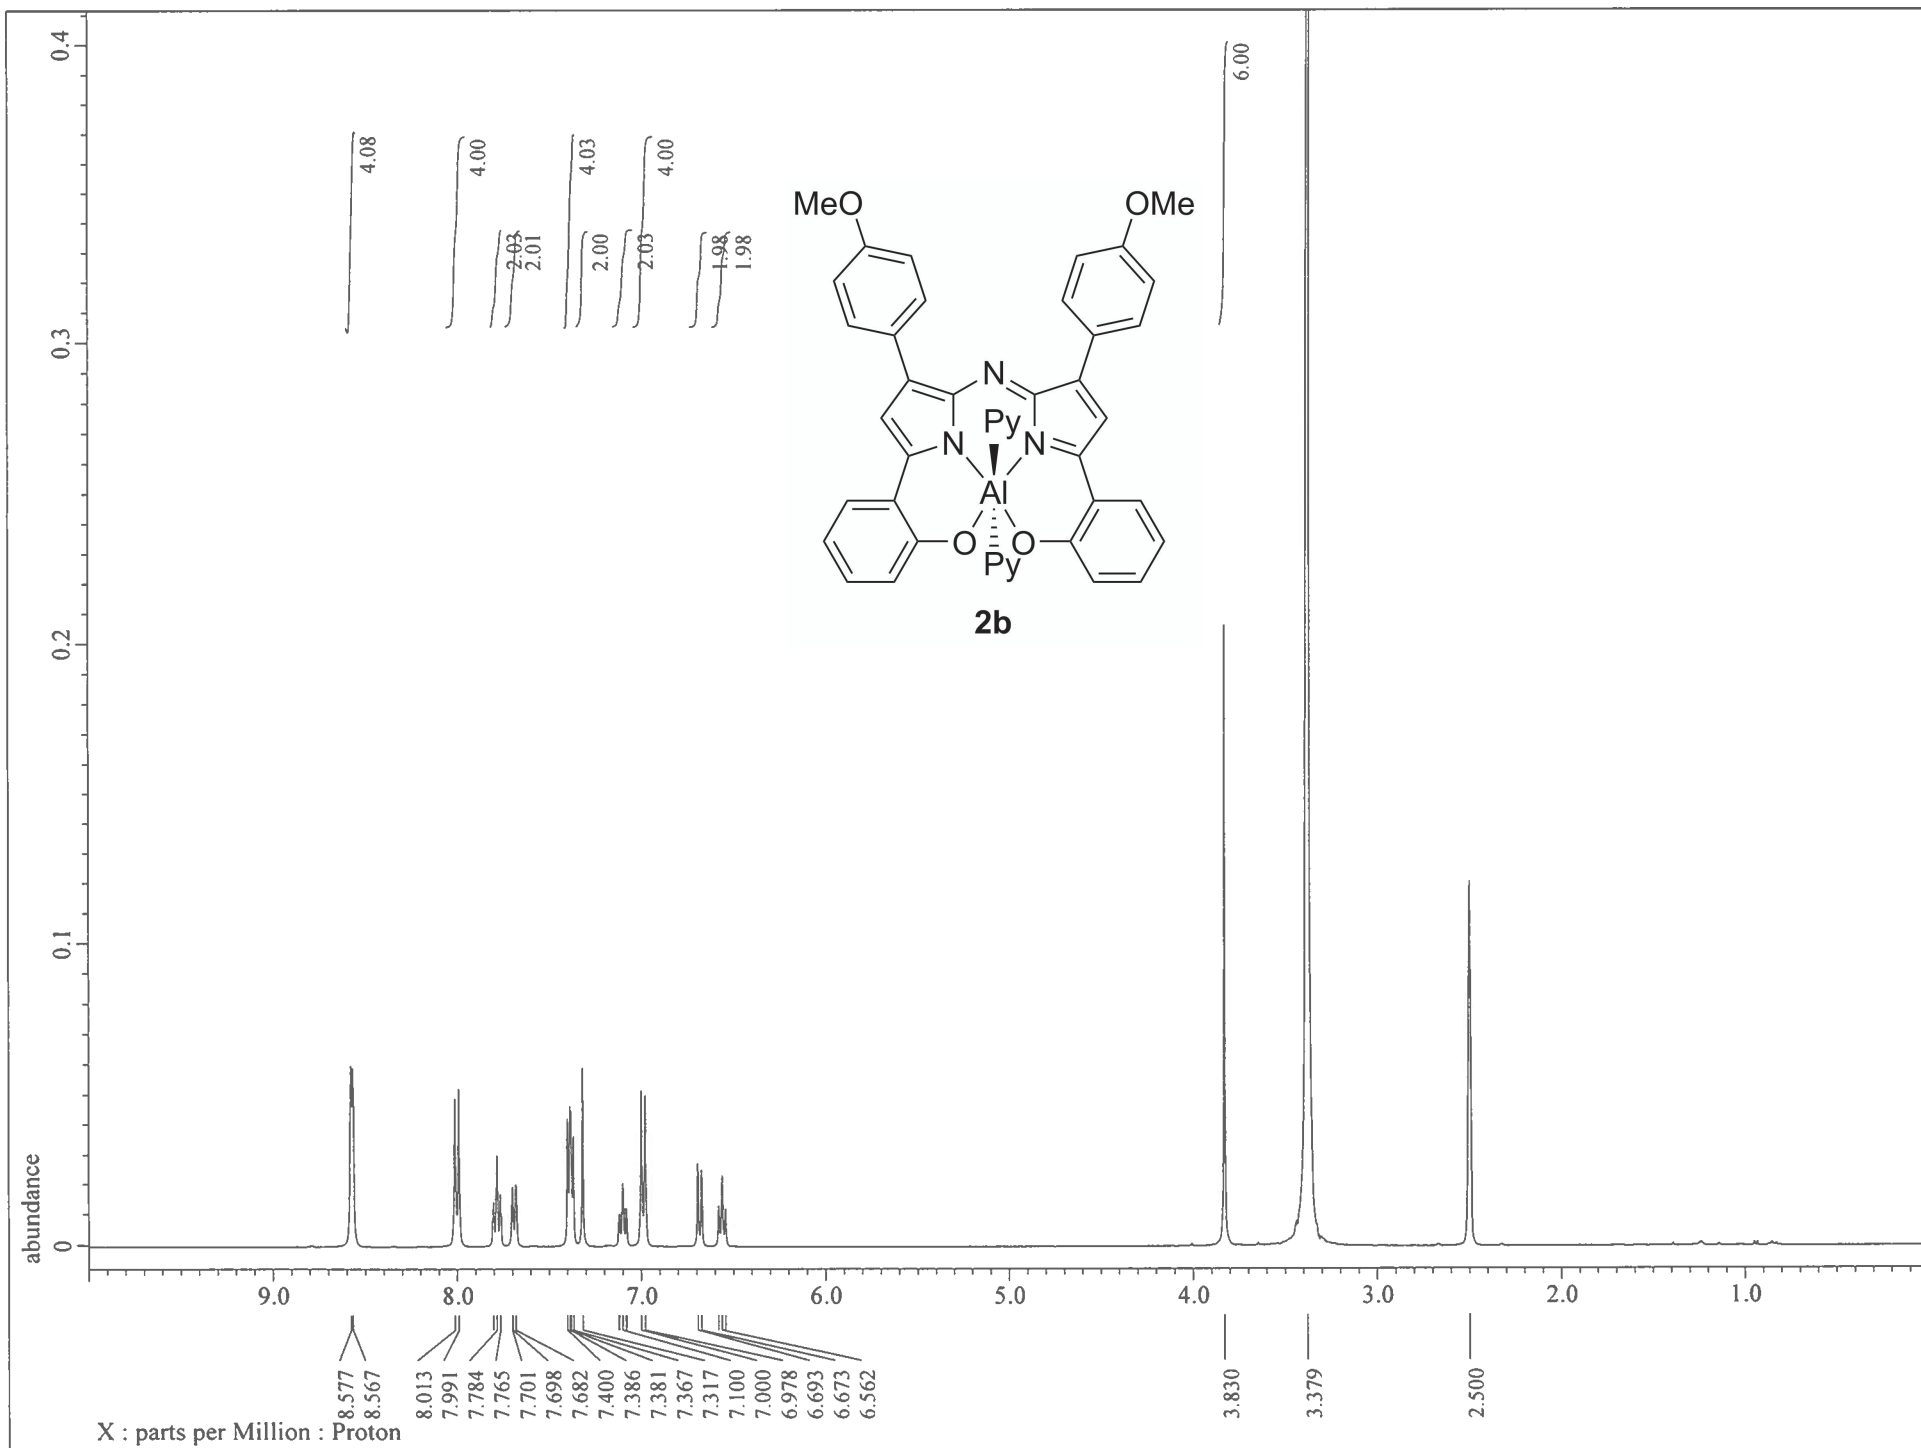

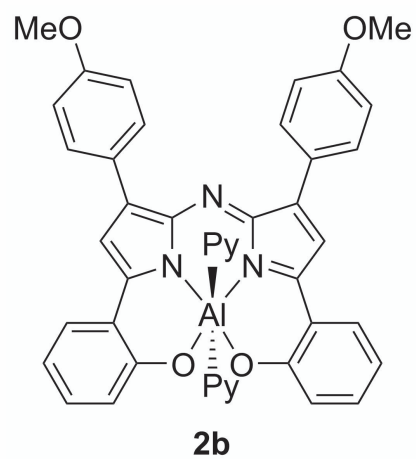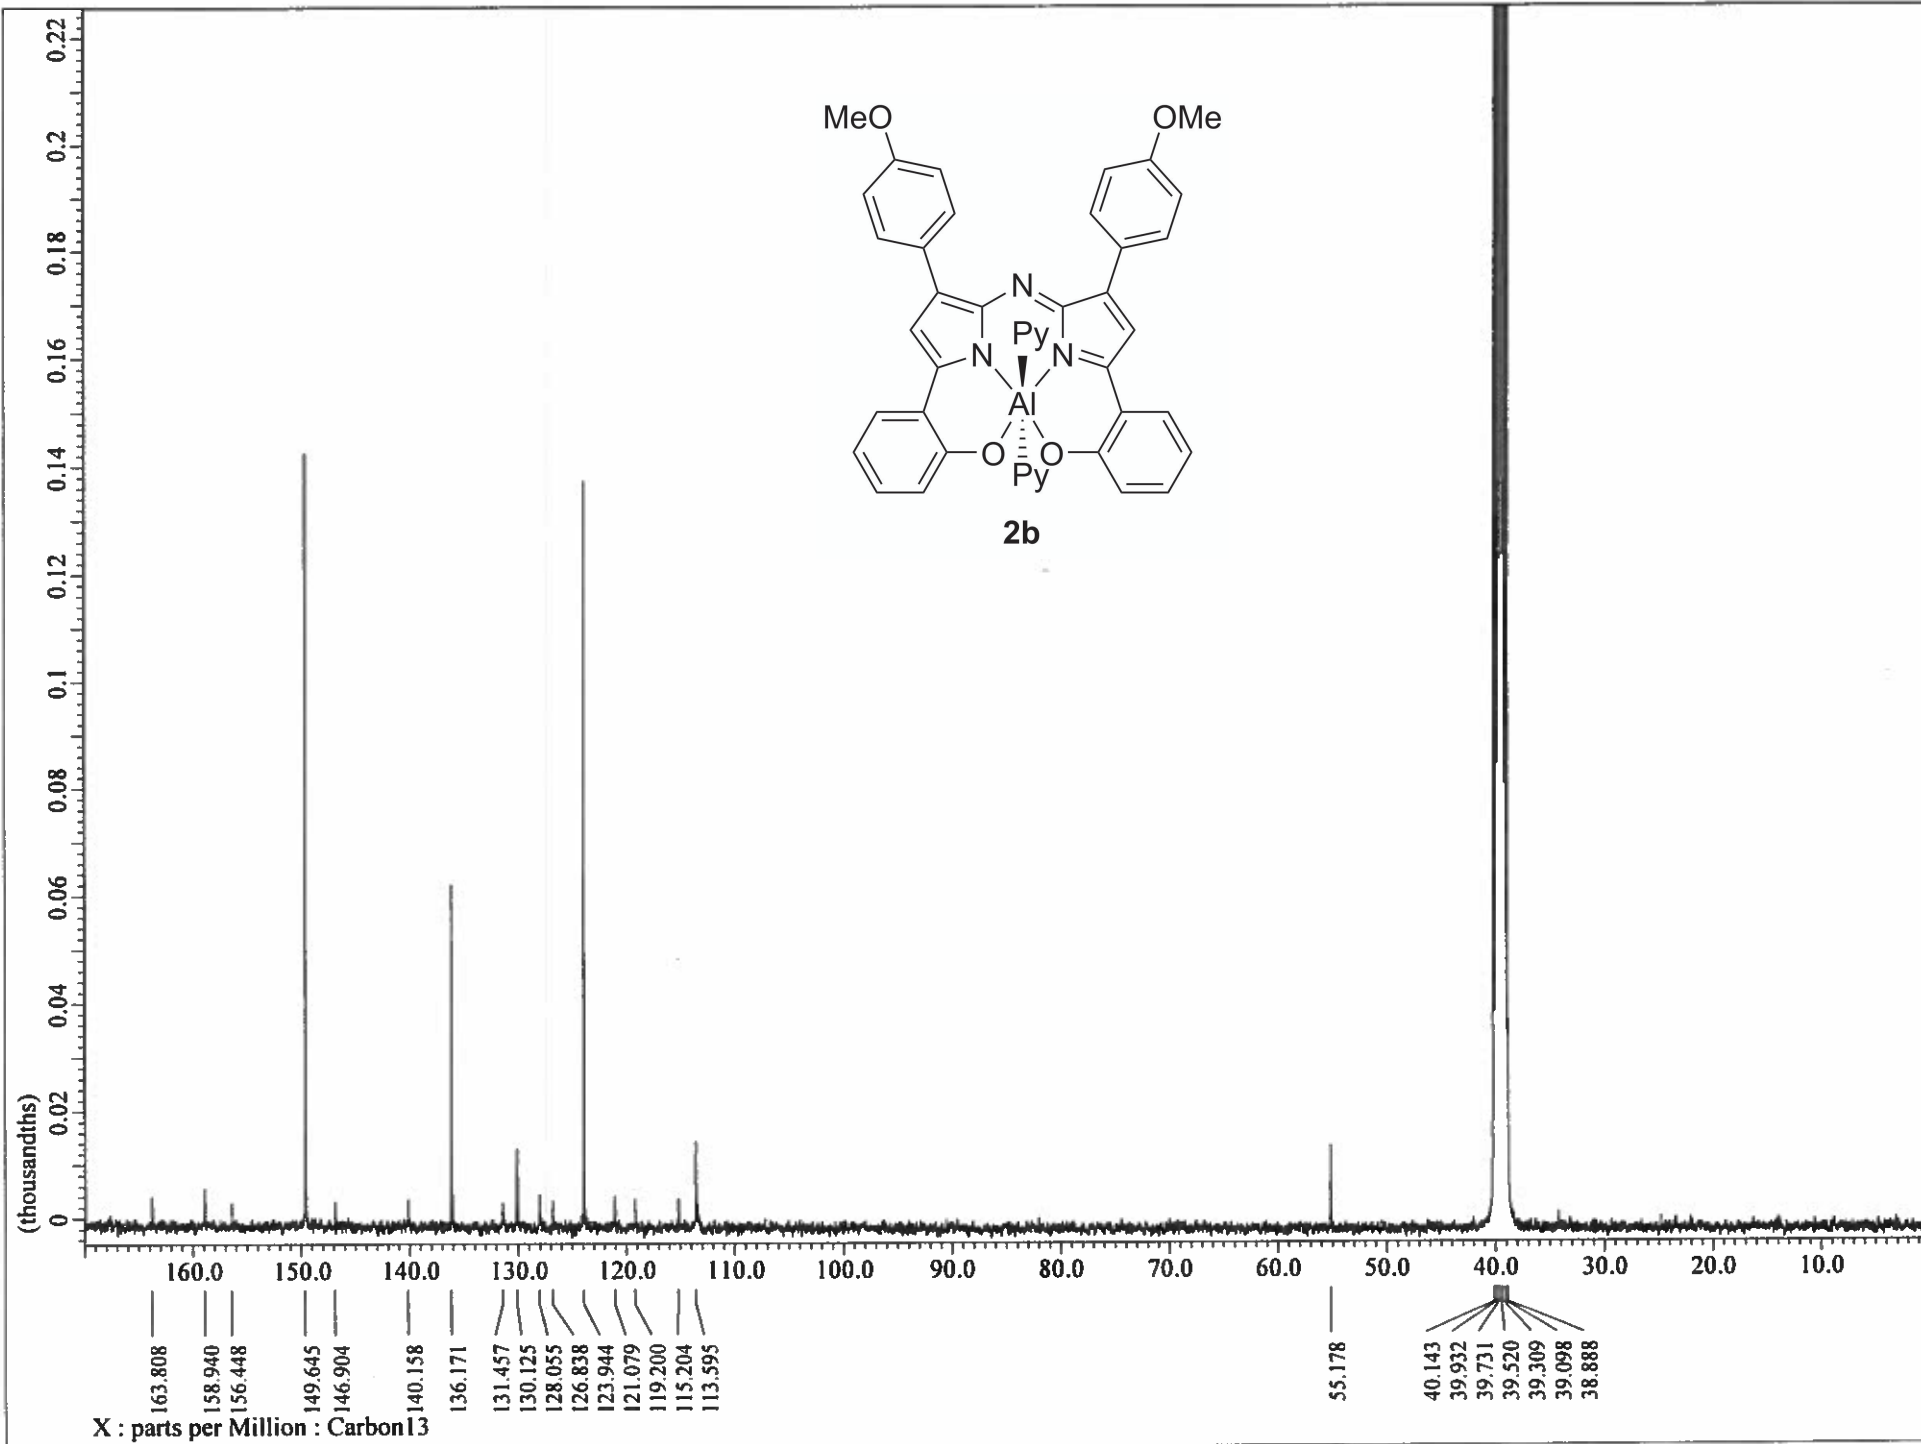

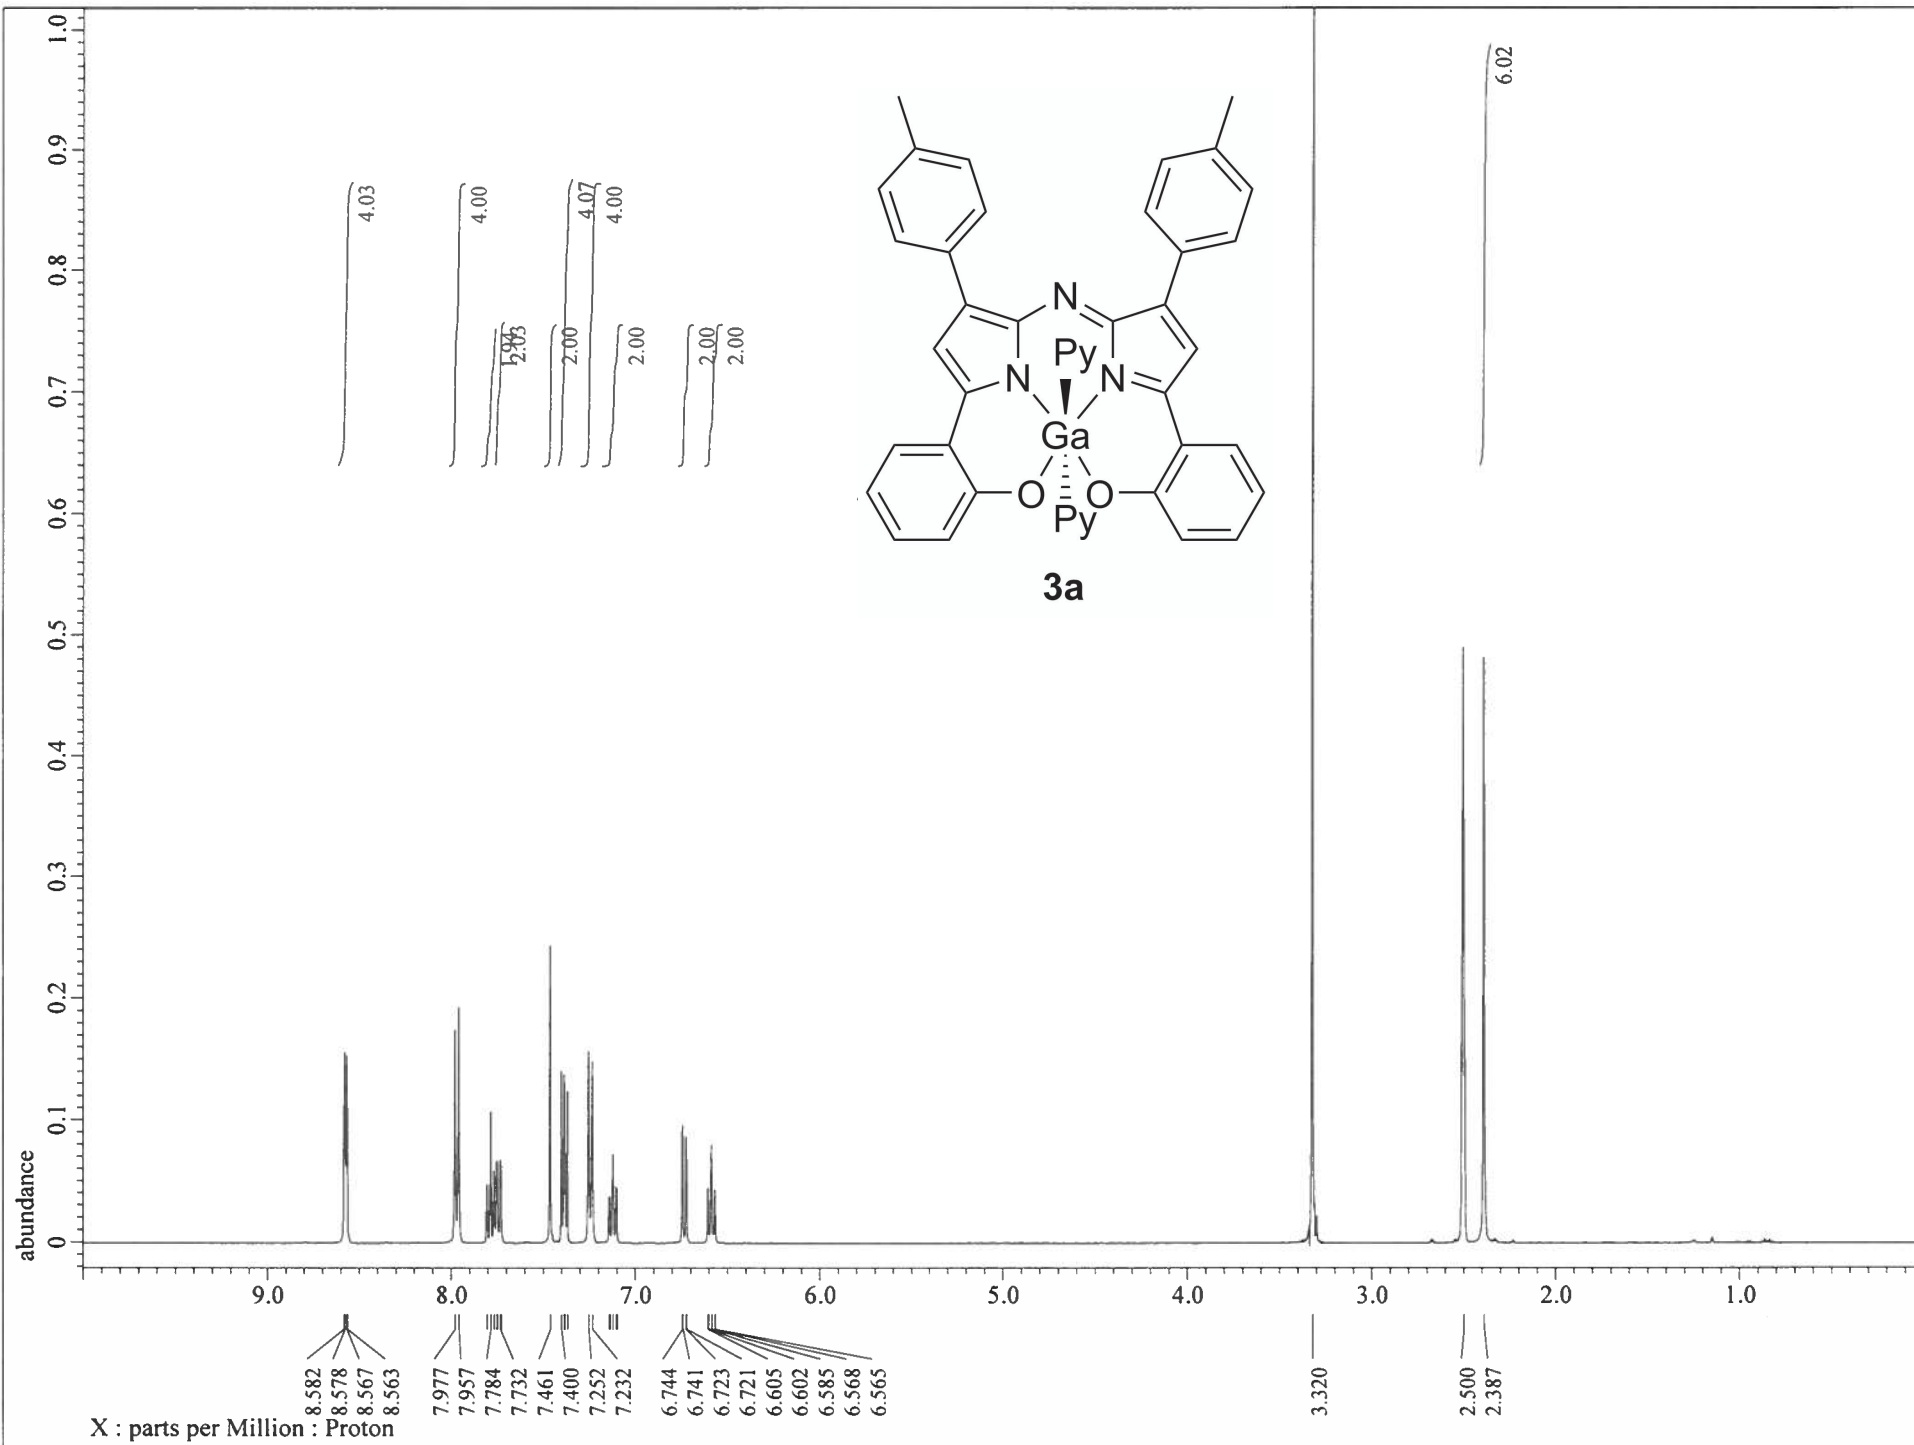

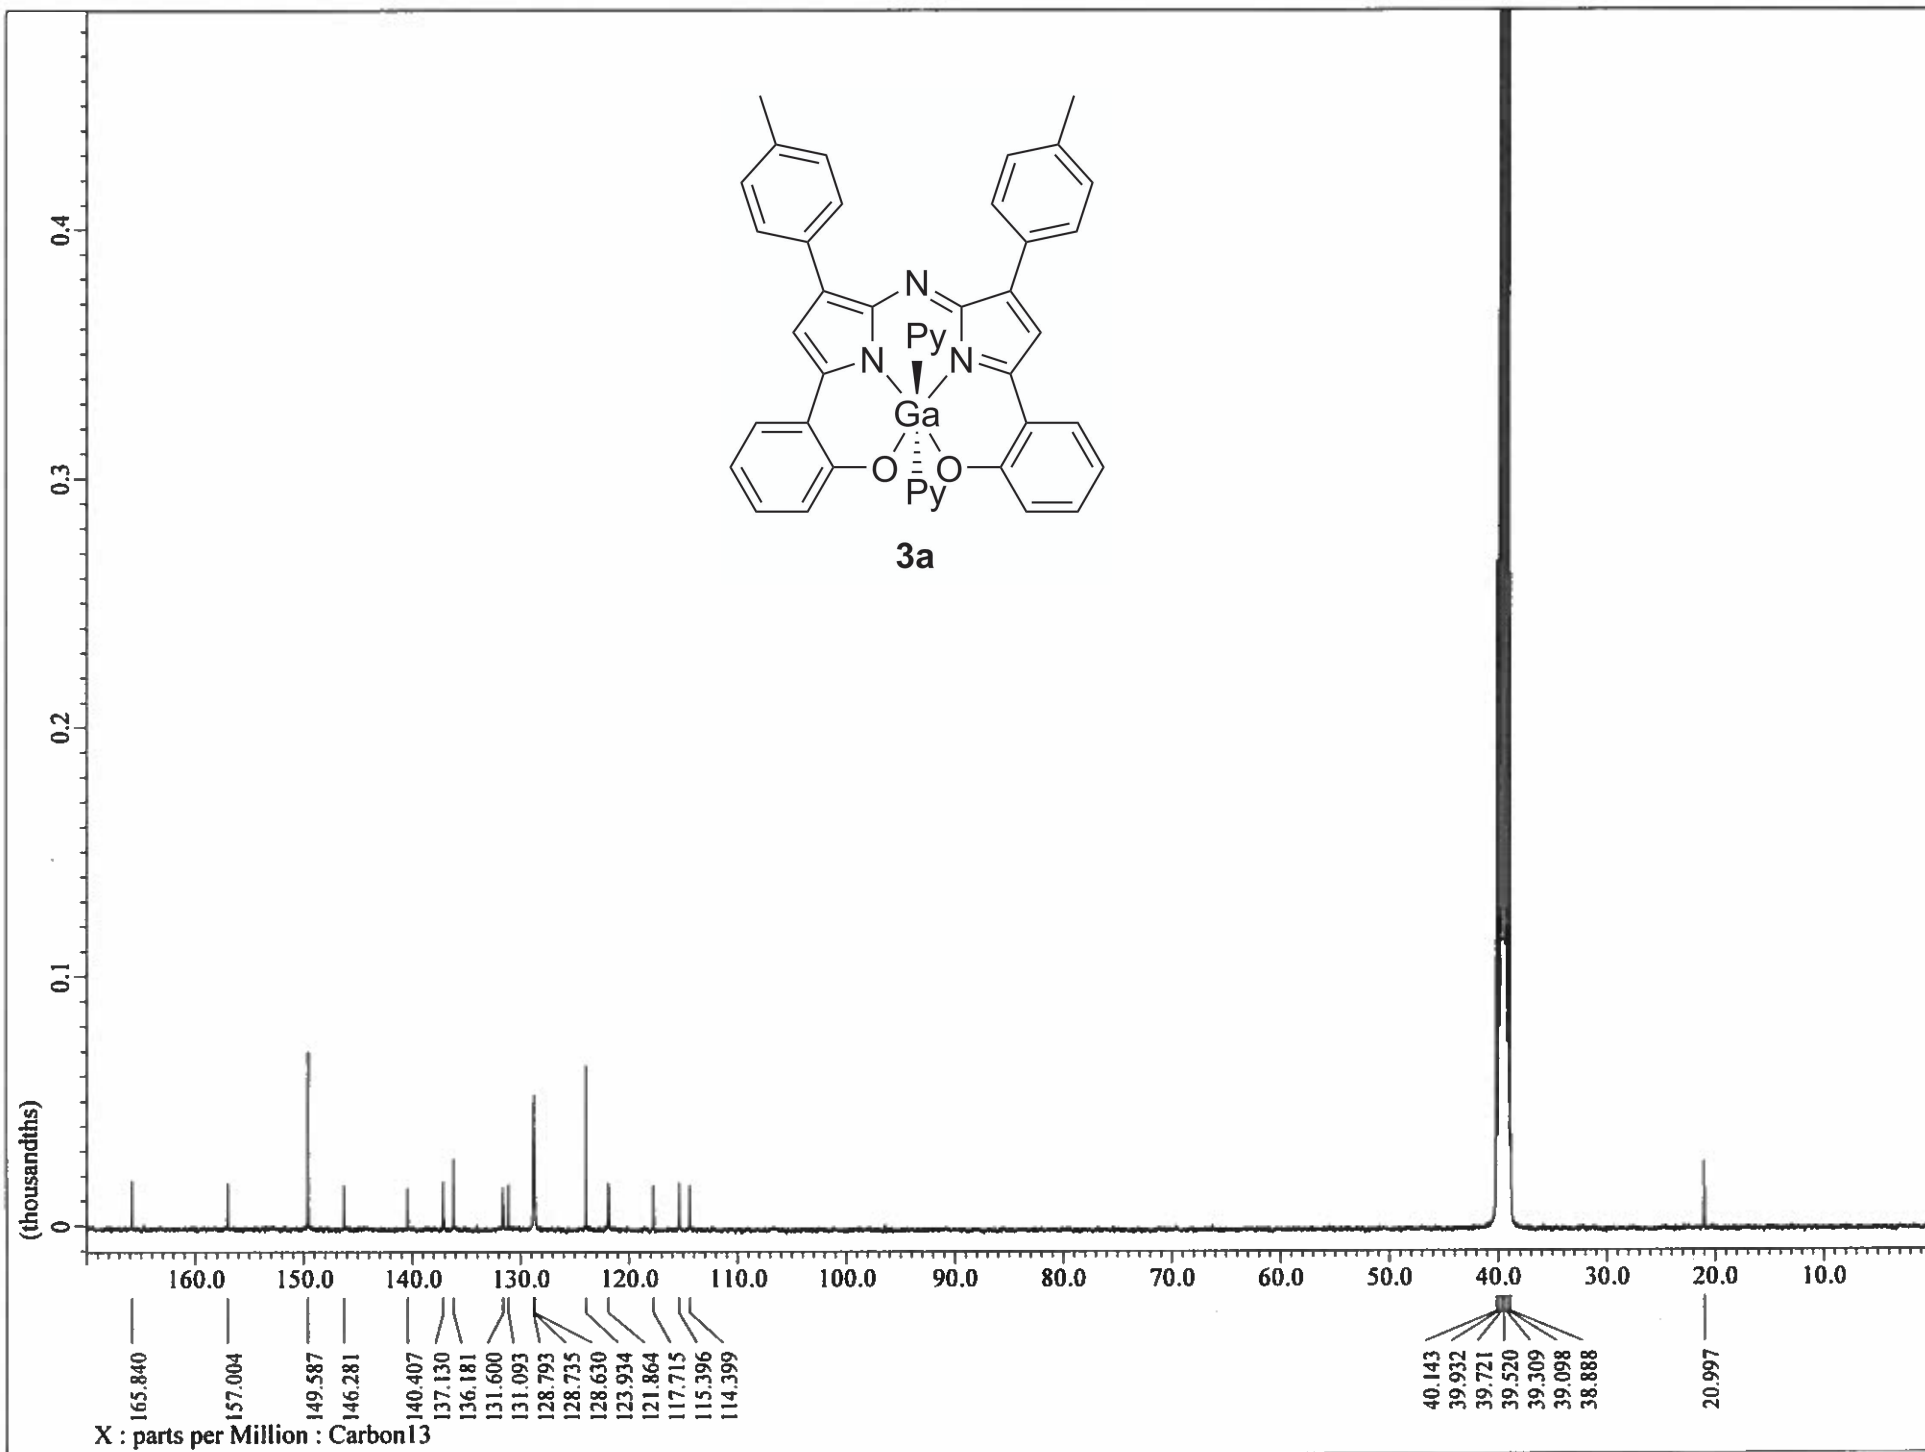



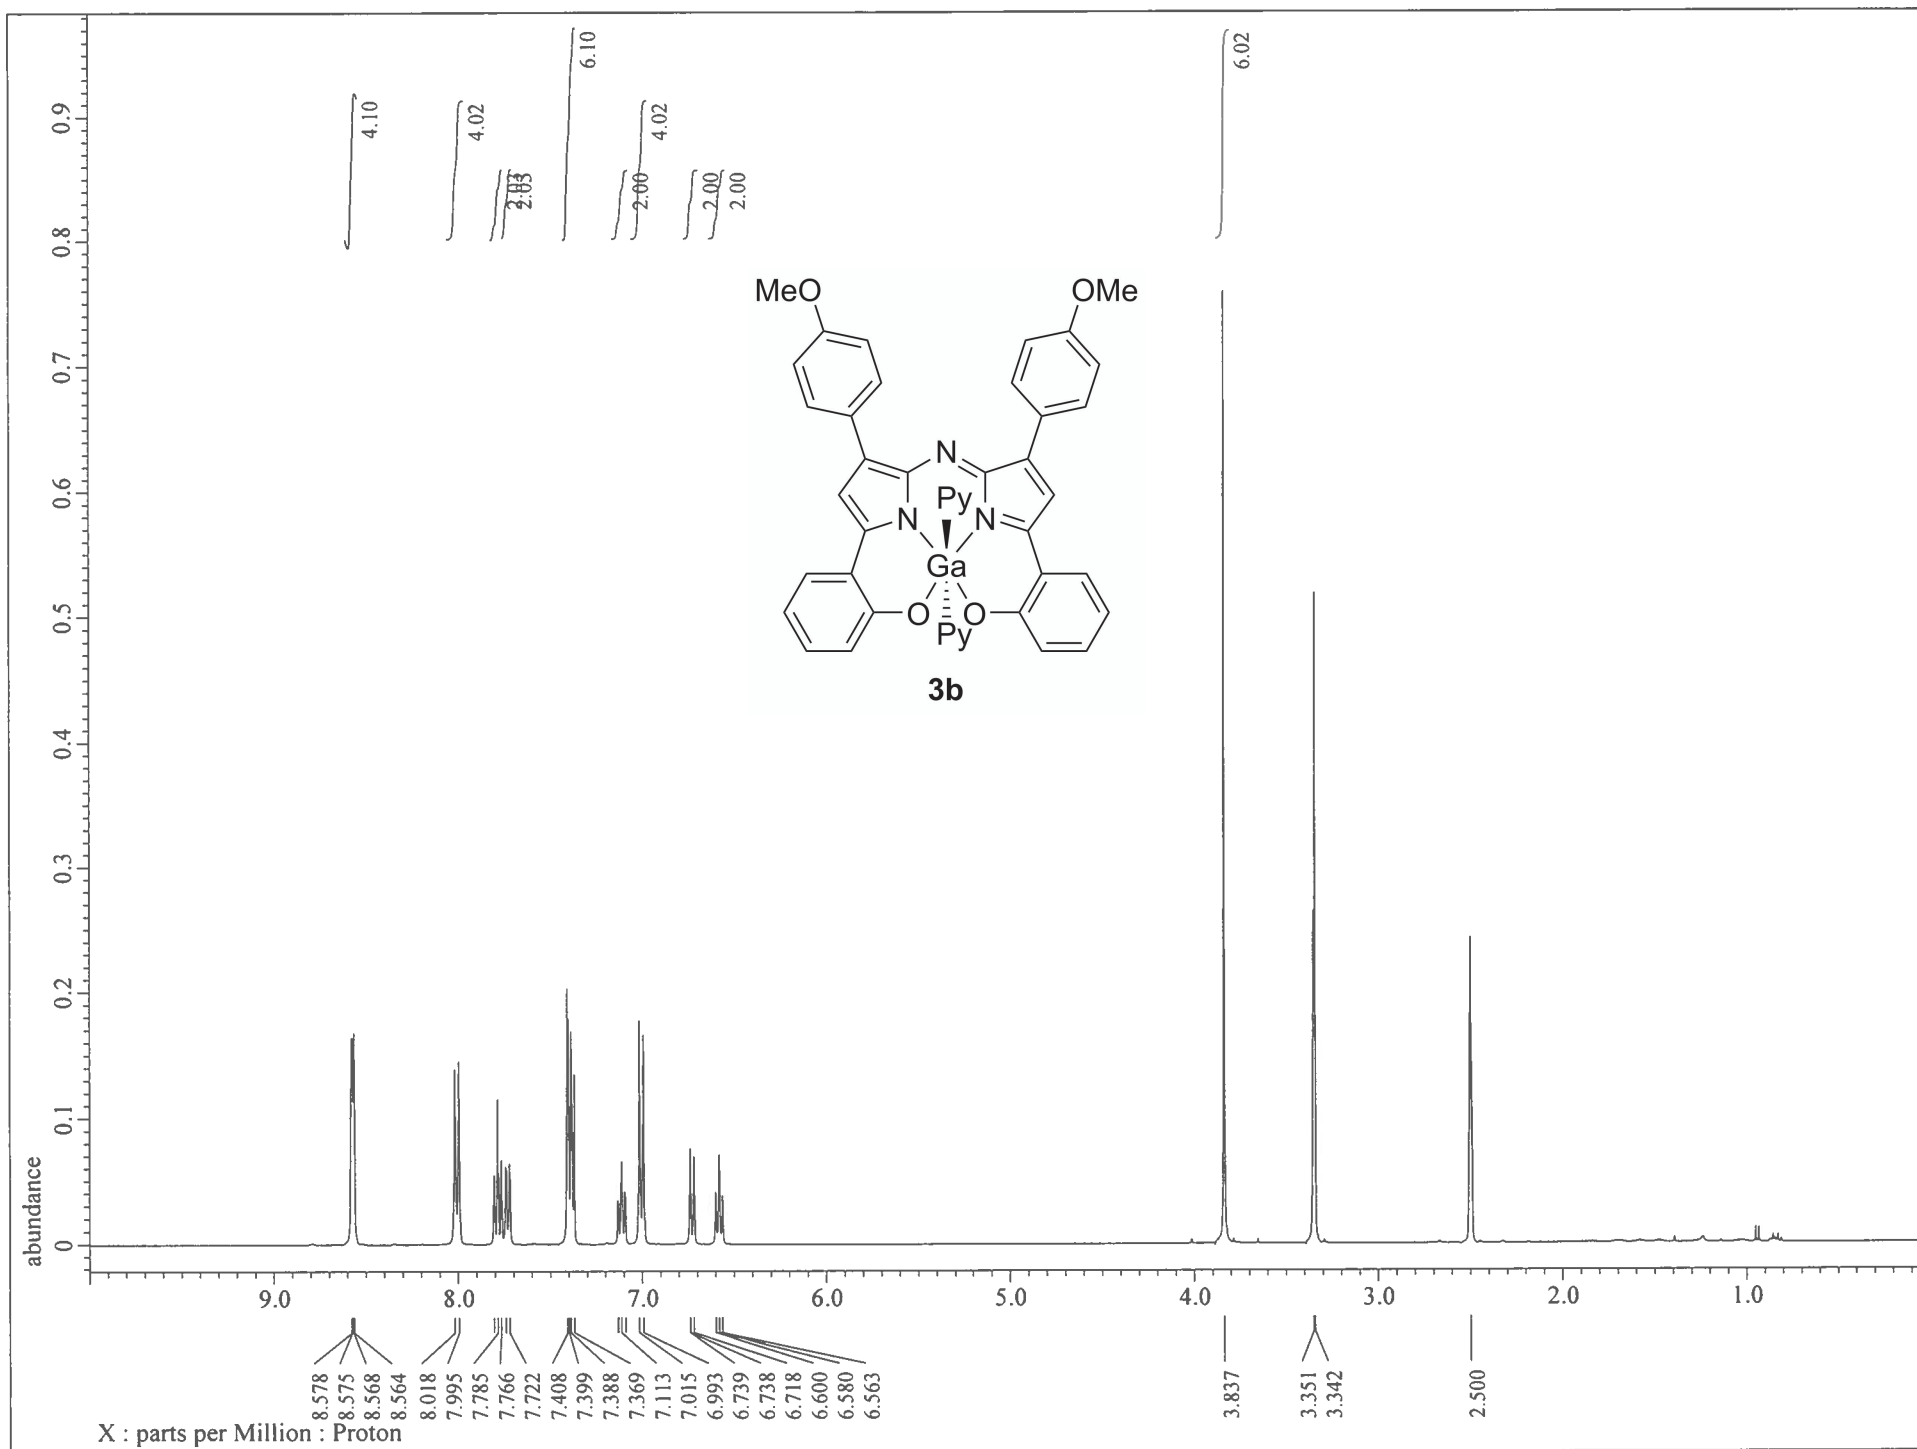

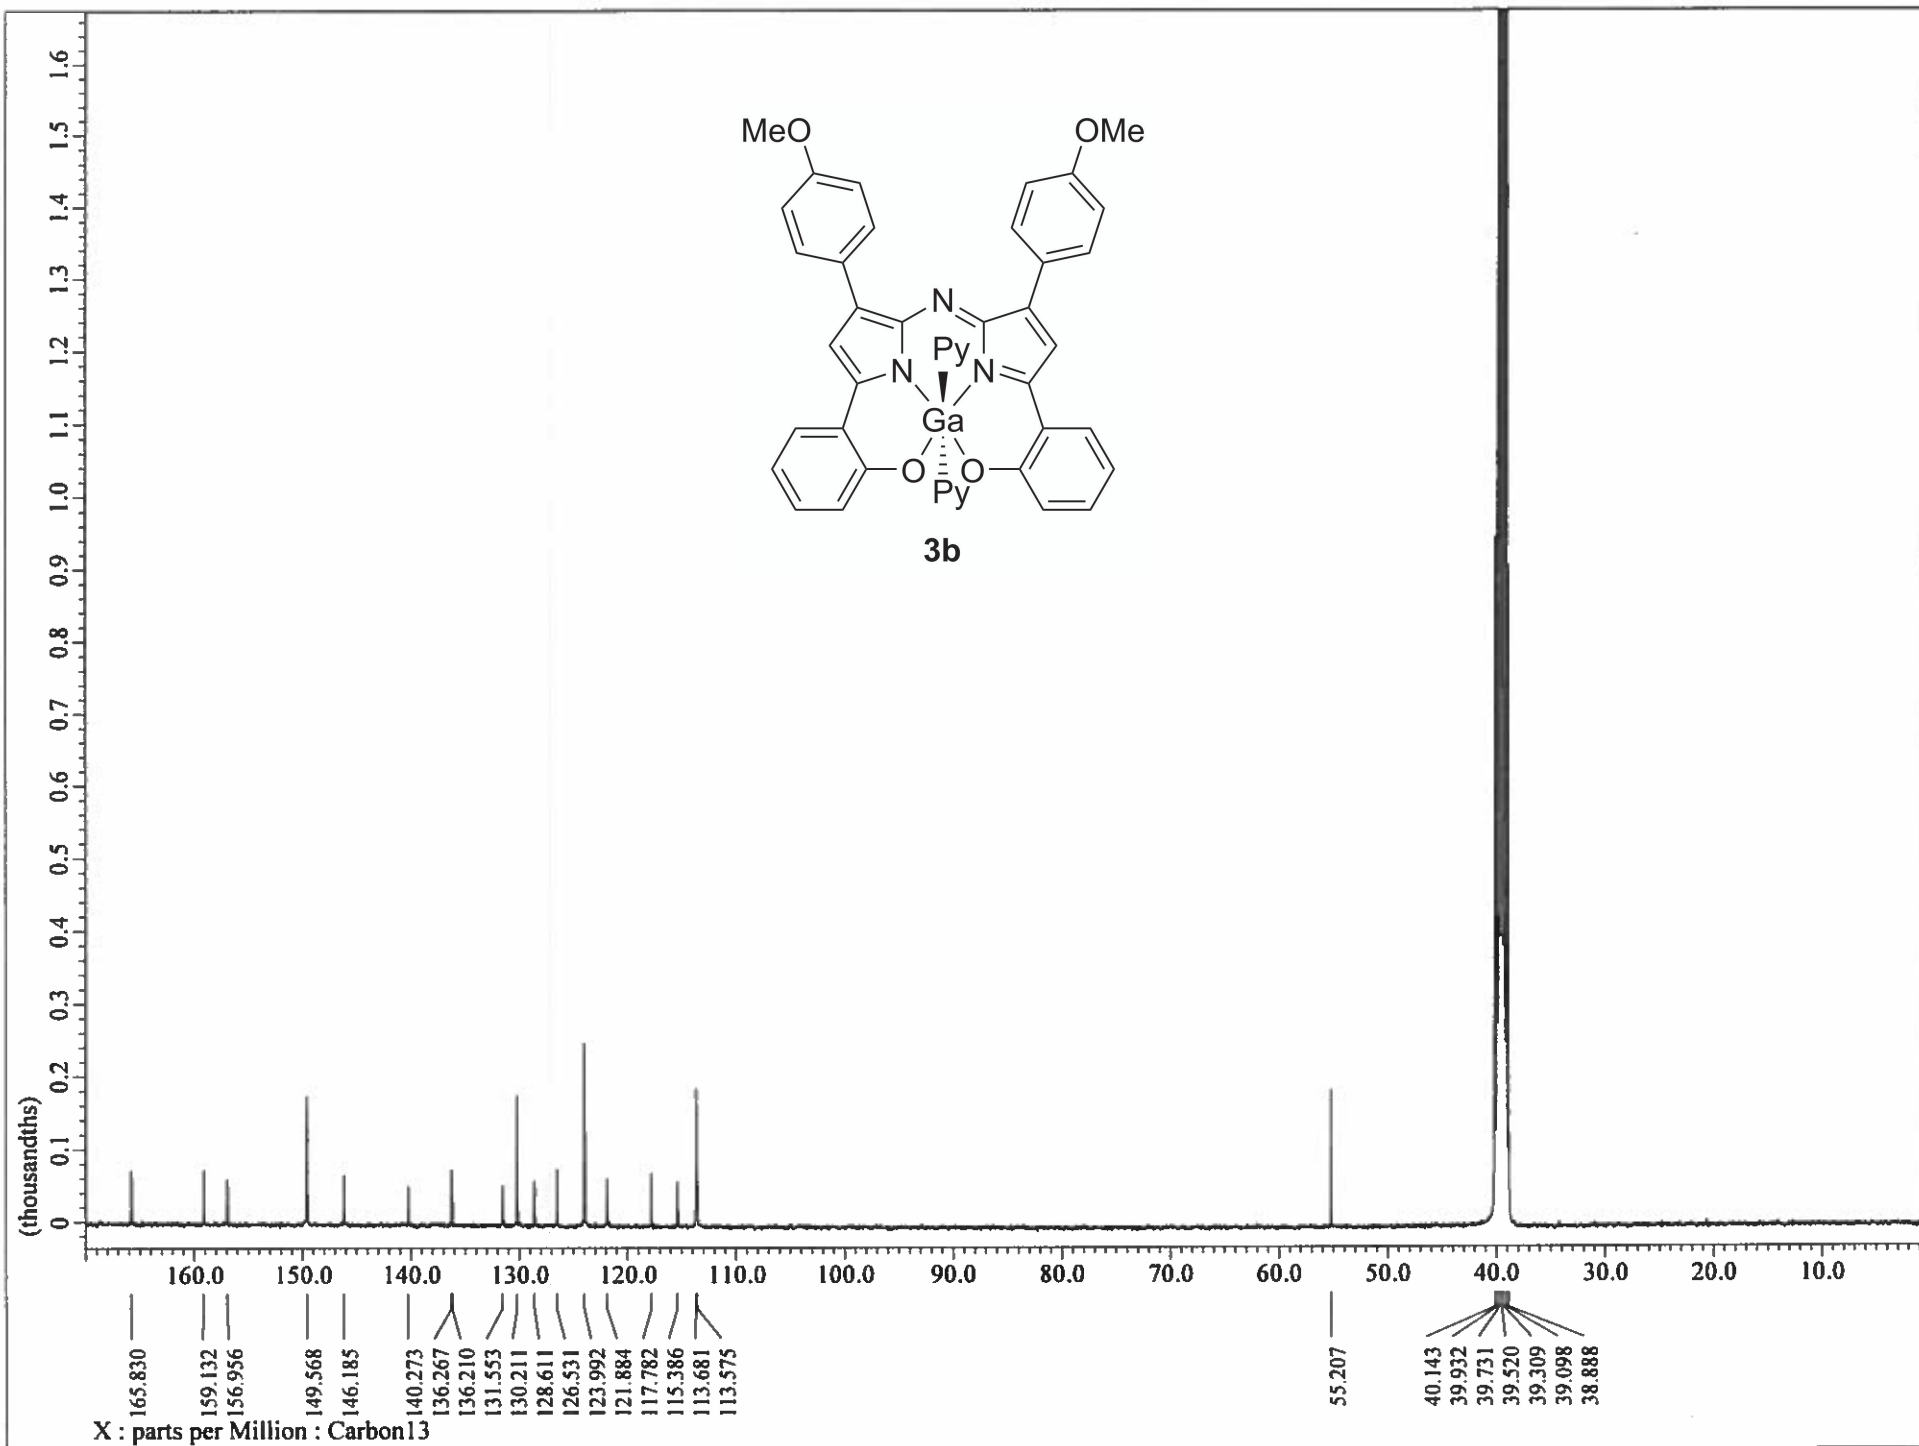

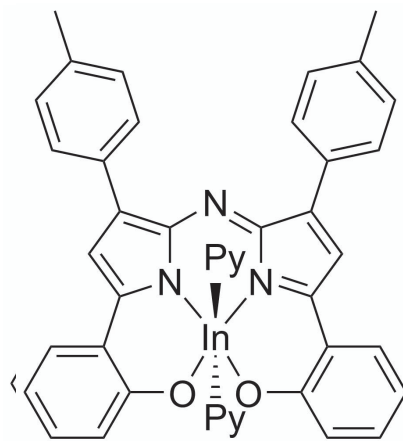

4a

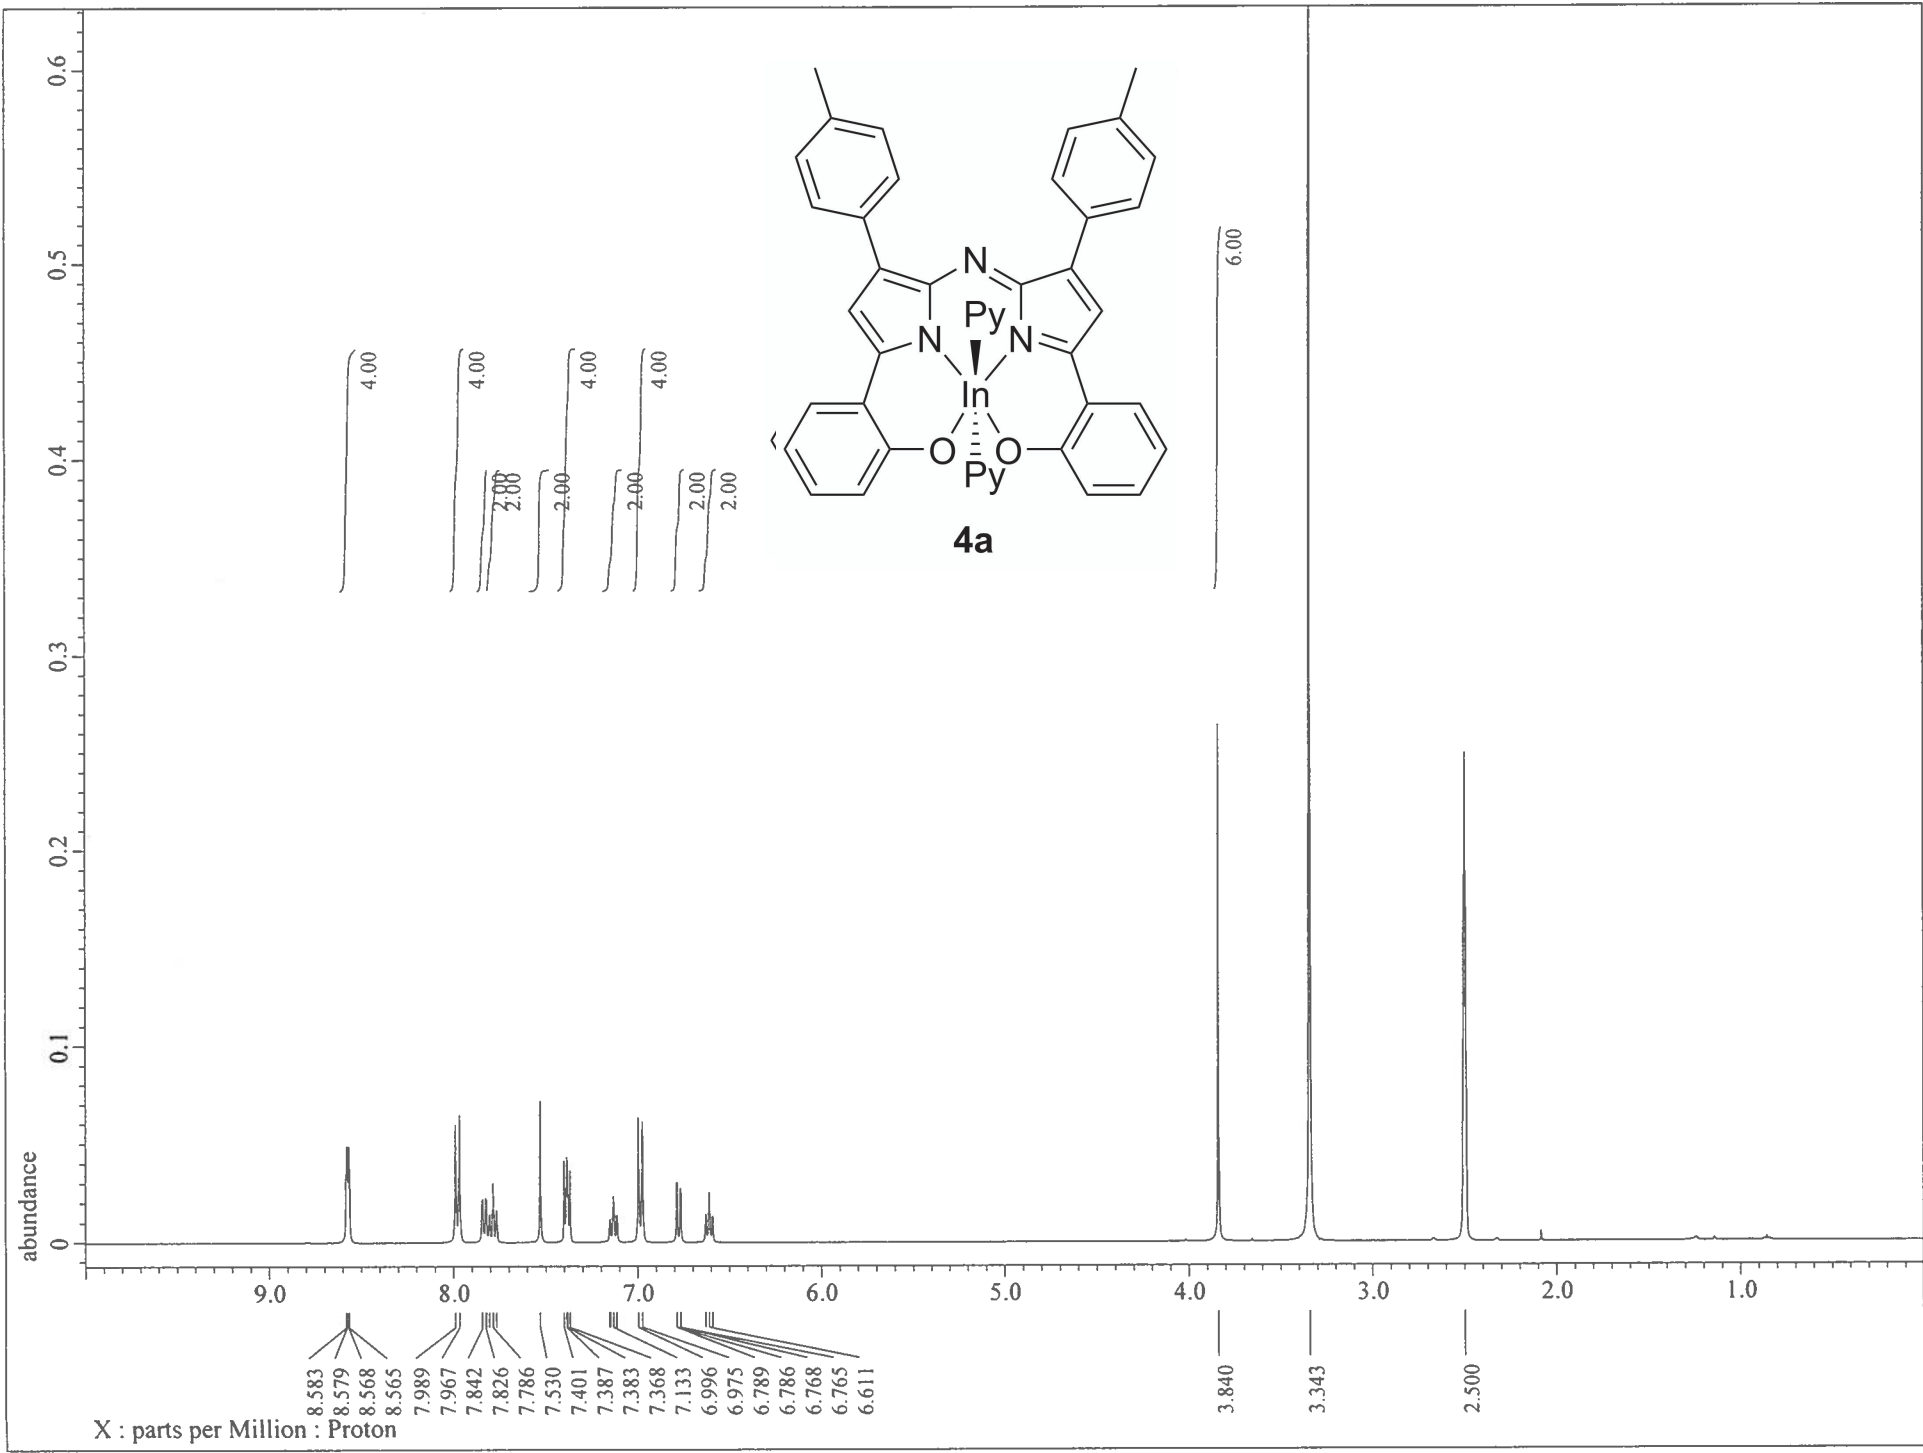

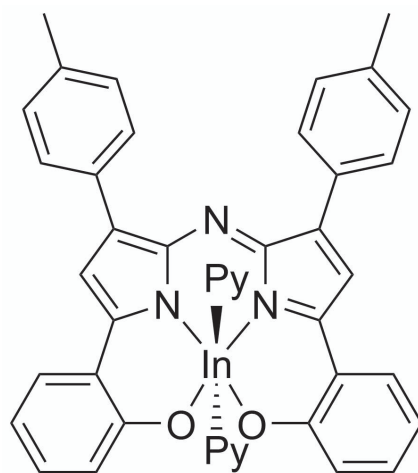

**4a**

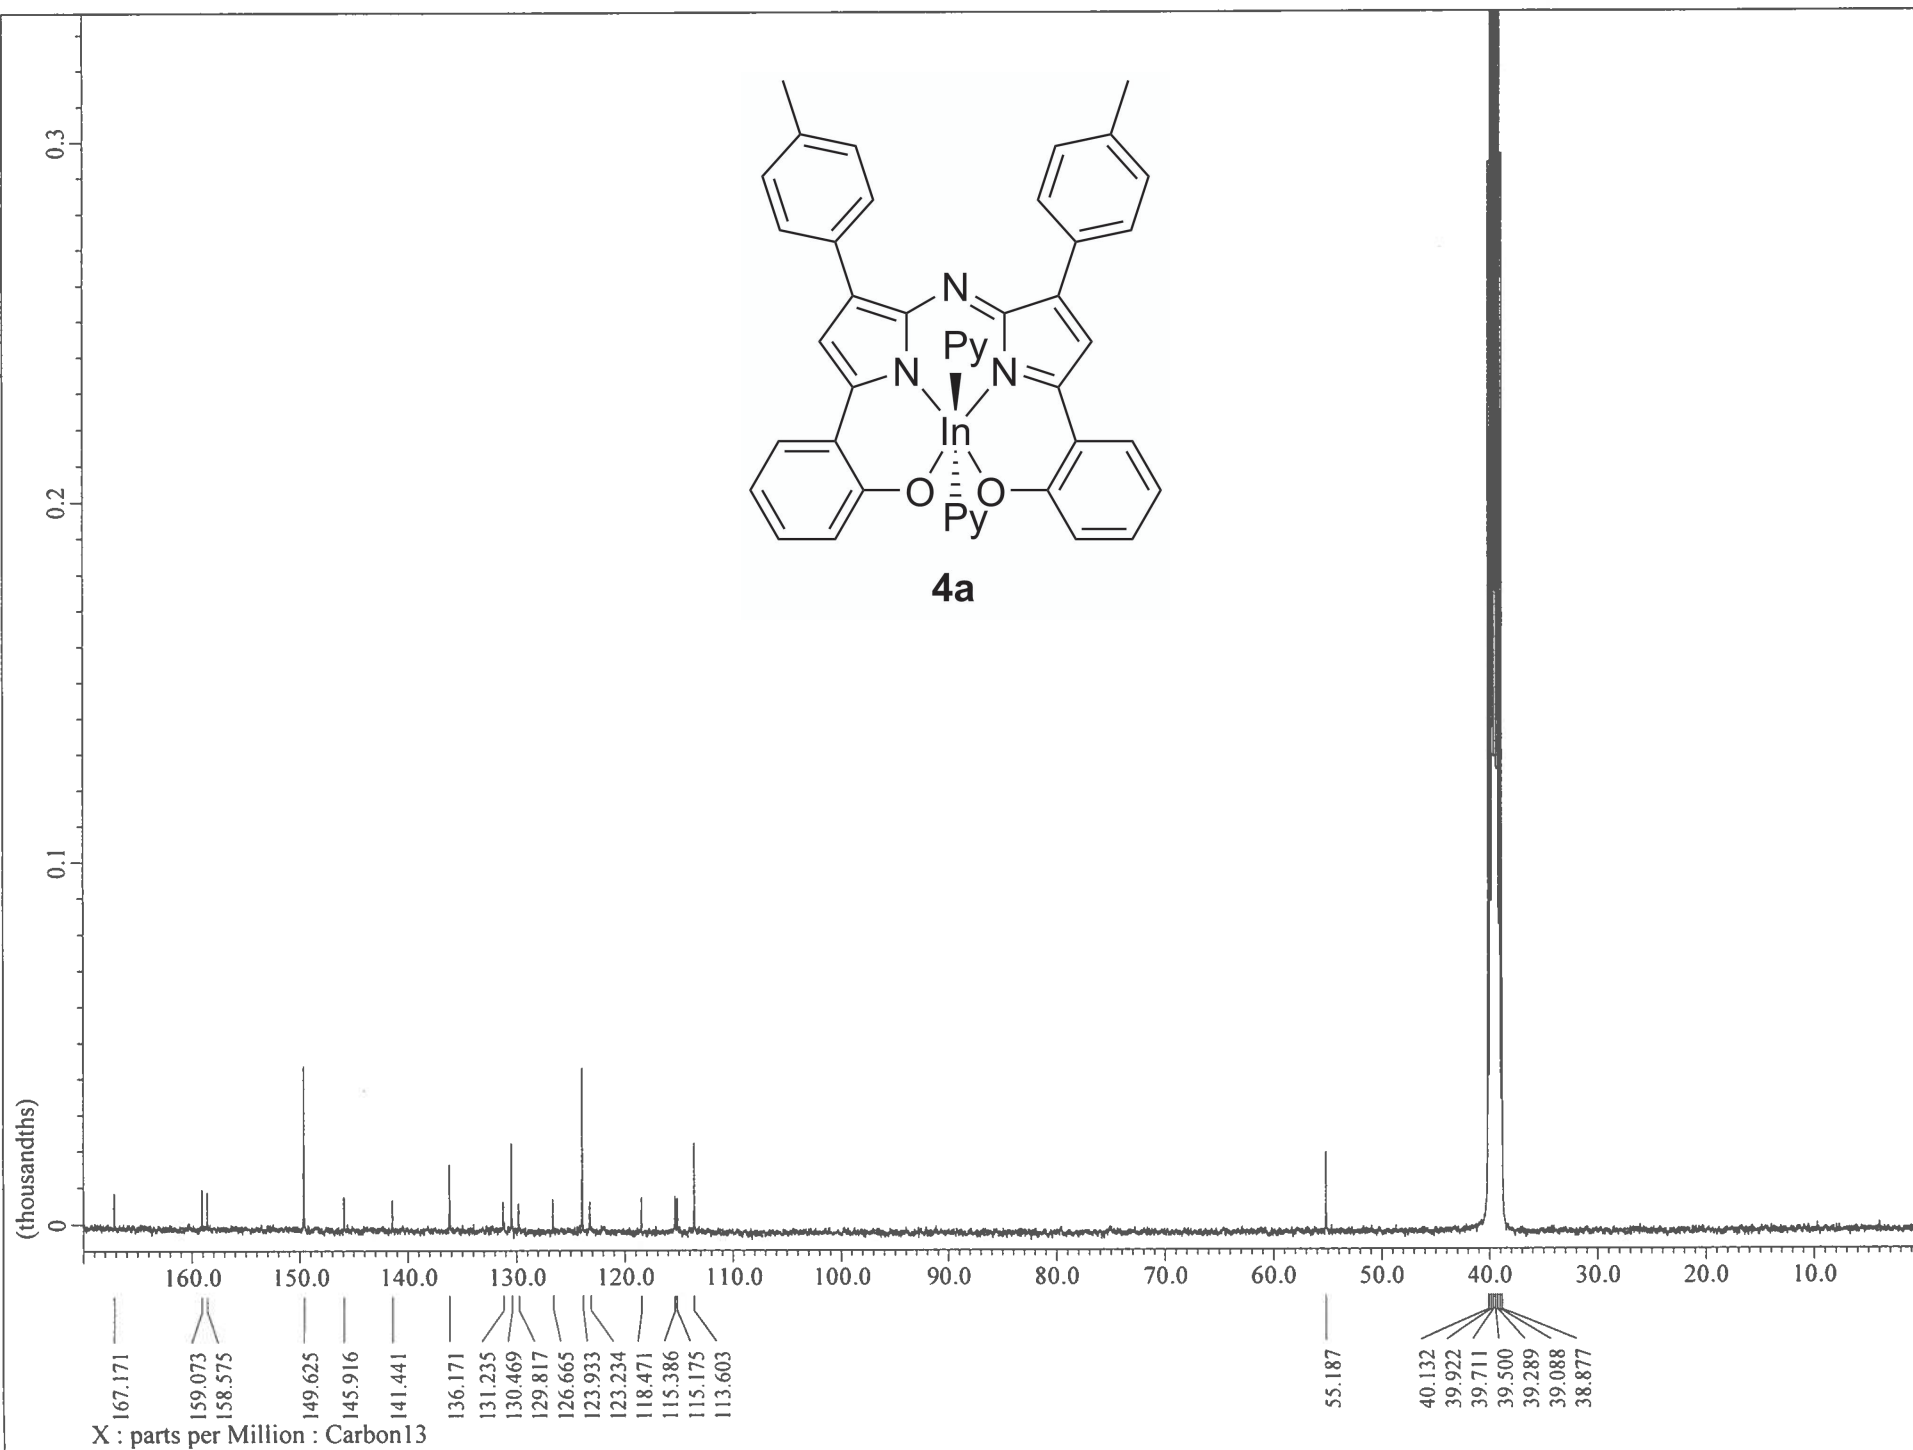

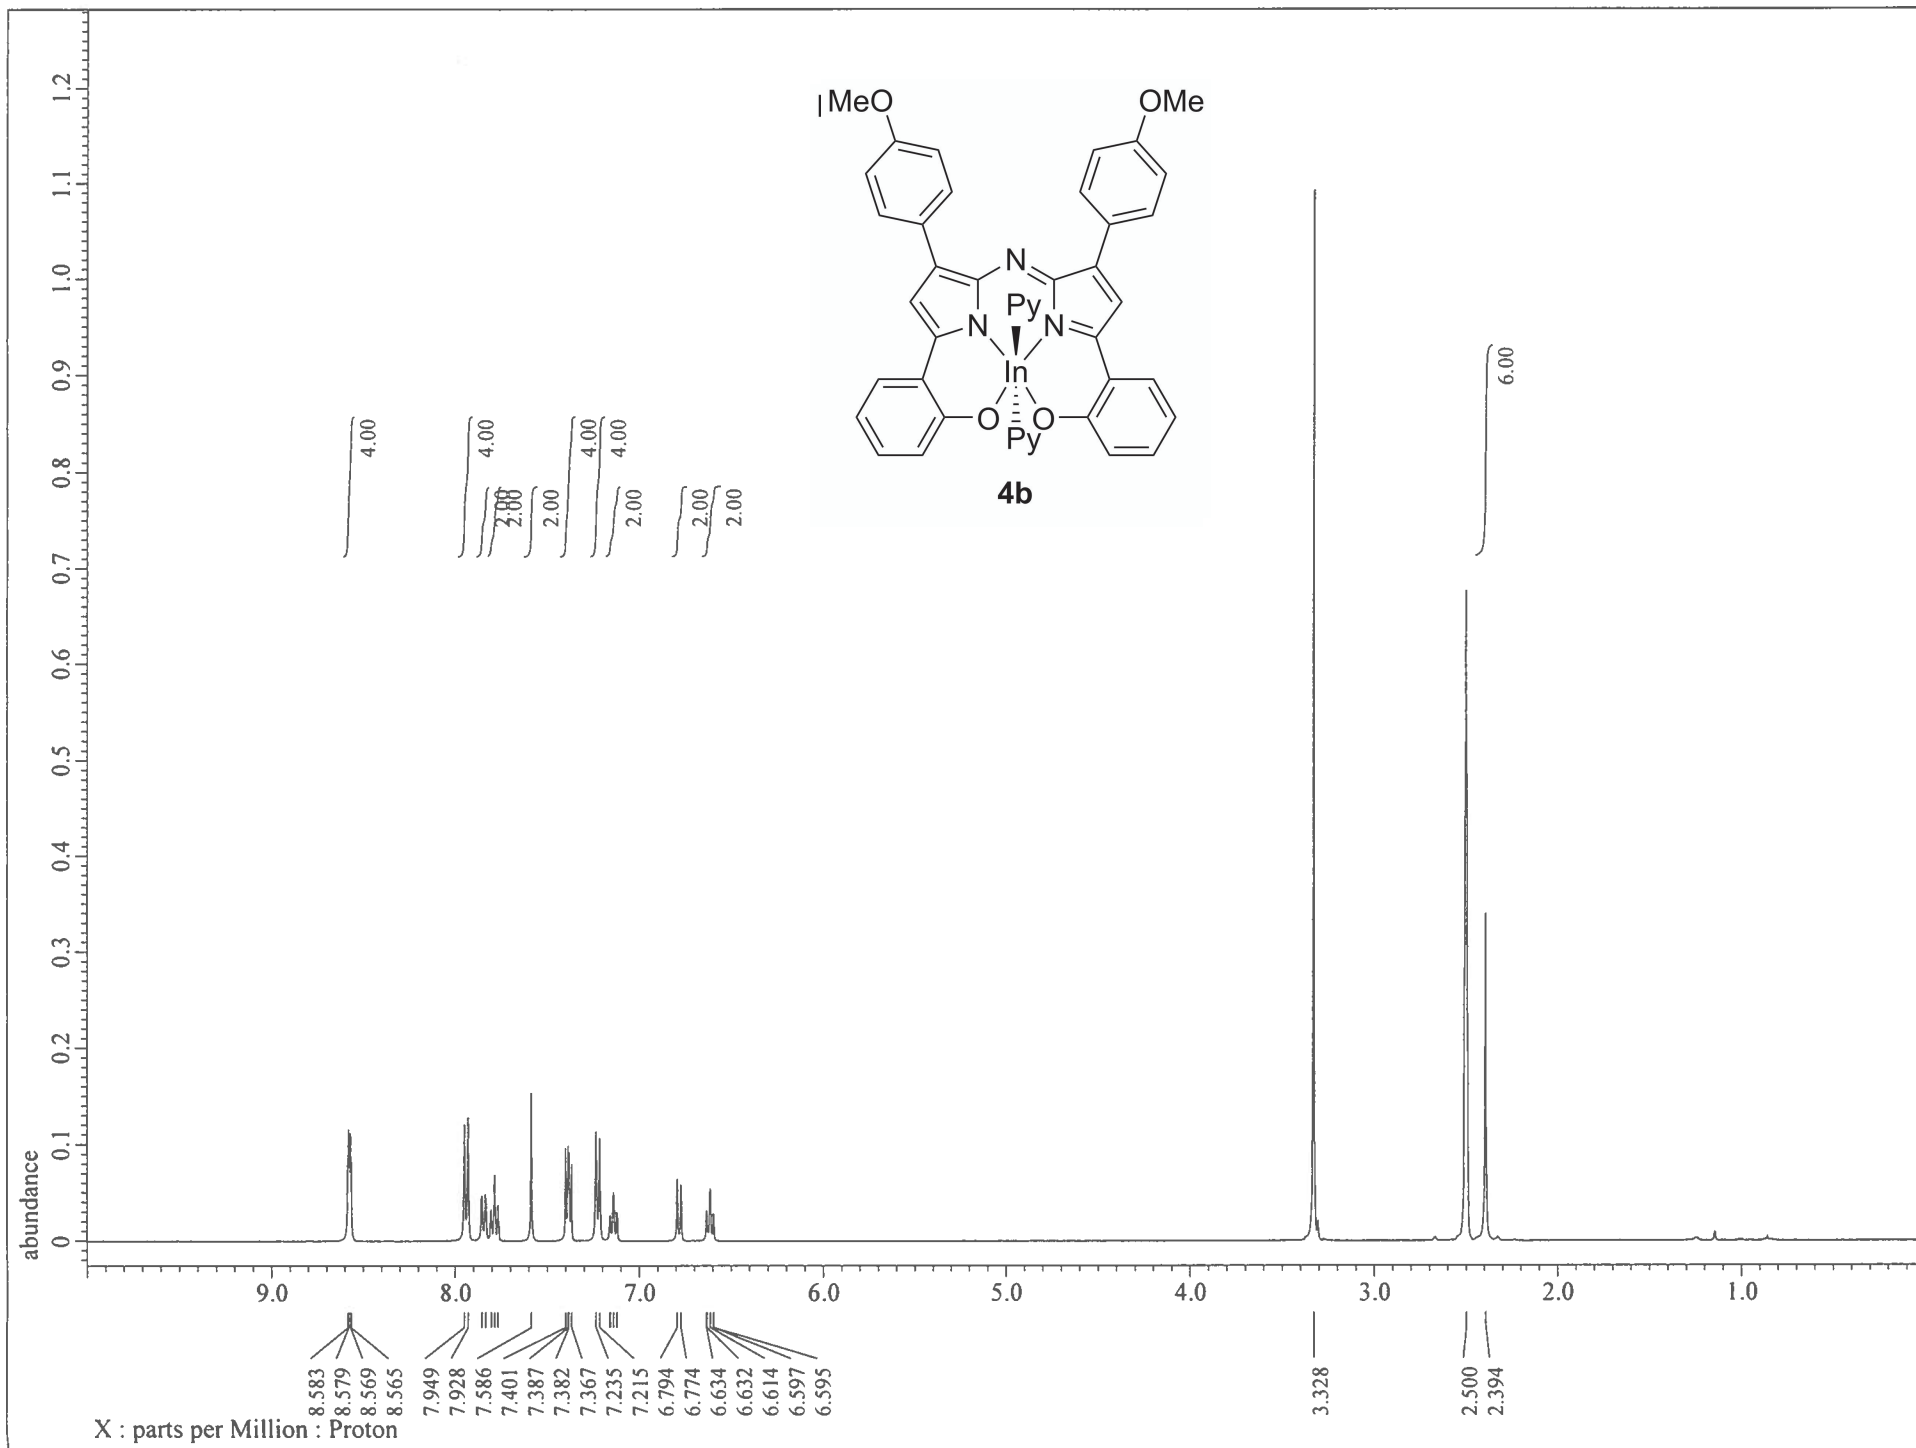

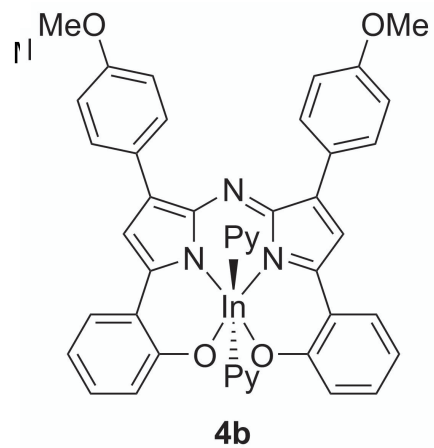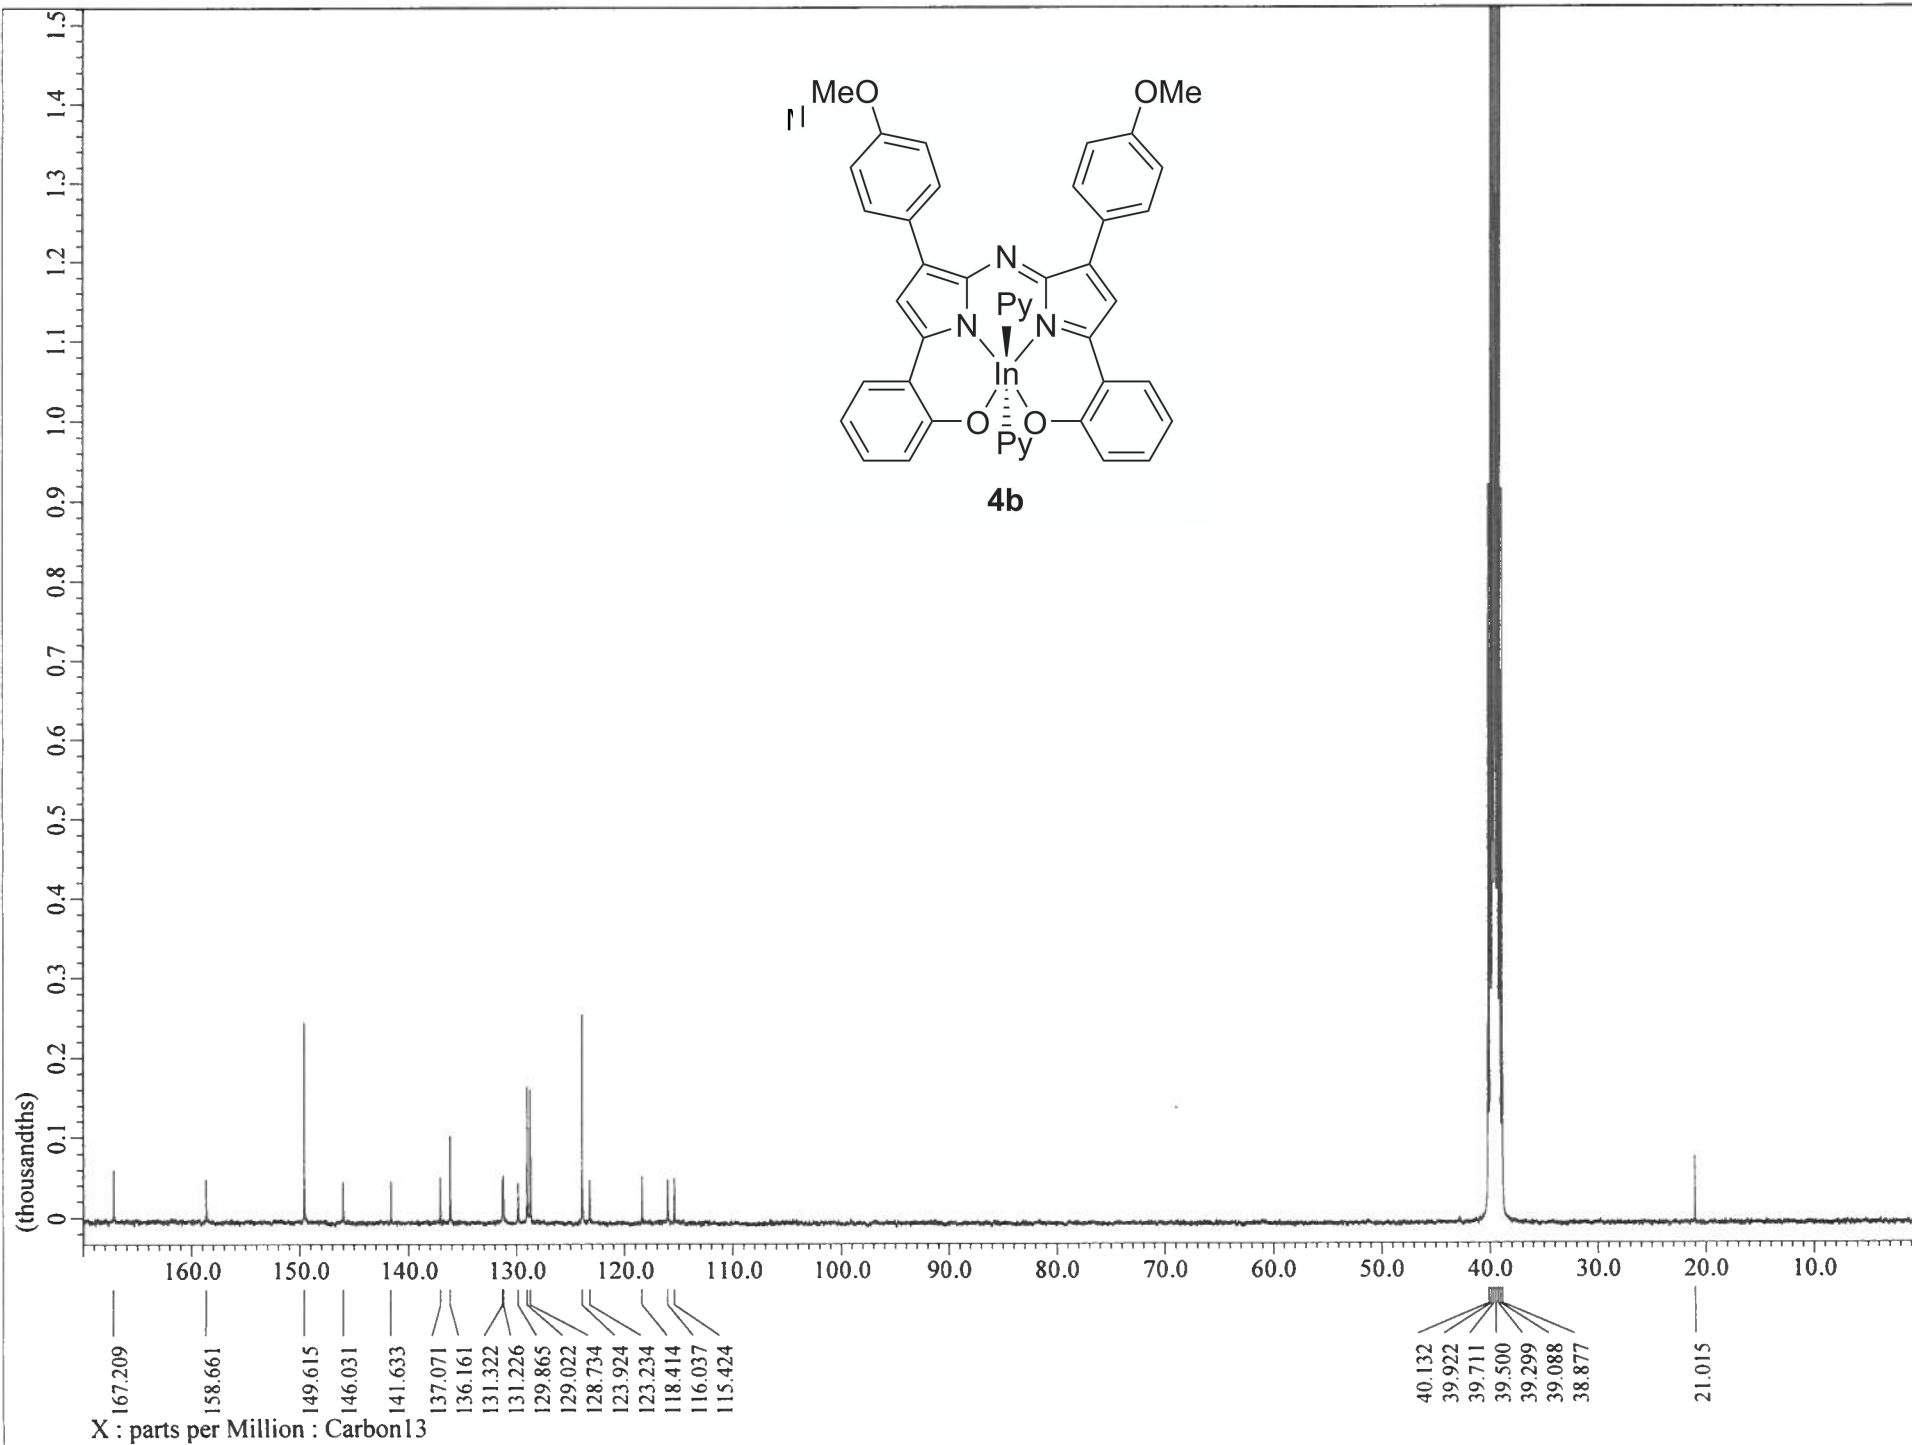

Supplement: s1 [file s1]
